# Supplementary material for: Mutations in emerging variant of concern lineages disrupt genomic sequencing of SARS-CoV-2 clinical specimens
Source: bioRxiv or medRxiv preprint supplement (doi:10.1101/2021.06.01.21258181), 2021-06-04
Supplement: Supplementary file [file media-1.pdf]

We gratefully acknowledge the following Authors from the Originating laboratories responsible for obtaining the specimens, as well as the Submitting laboratories where the genome data were generated and shared via GISAID, on which this research is based.

All Submitters of data may be contacted directly via [www.gisaid.org](http://www.gisaid.org)

Authors are sorted alphabetically.

| Accession ID                                                                        | Originating Laboratory                                                                                                          | Submitting Laboratory                                                                                              | Authors                                                                                                                                                                                                                                                                             |
|-------------------------------------------------------------------------------------|---------------------------------------------------------------------------------------------------------------------------------|--------------------------------------------------------------------------------------------------------------------|-------------------------------------------------------------------------------------------------------------------------------------------------------------------------------------------------------------------------------------------------------------------------------------|
| EPI_ISL_1000671, EPI_ISL_1000673                                                    | Instituto de Biotecnologia - UNESP-Botucatu-SP                                                                                  | Instituto de Biotecnologia - UNESP-Botucatu-SP                                                                     | Leila Sabrina Ullmann; Fábio Sossai Possebon, Camila Dantas Malossi, Paula Rahal, Paulo Inacio da Costa, João Pessoa Araújo Jr.                                                                                                                                                     |
| EPI_ISL_1000993, EPI_ISL_1001041                                                    | KU Leuven, Rega Institute, Clinical and Epidemiological Virology                                                                | KU Leuven, Rega Institute, Clinical and Epidemiological Virology                                                   | Tony Wawina-Bokalanga, Bert Vanmechelen, Joan Marti-Carerras, Piet Maes                                                                                                                                                                                                             |
| EPI_ISL_1001384, EPI_ISL_1001385                                                    | Outre mer                                                                                                                       | National Reference Center for Viruses of Respiratory Infections, Institut Pasteur, Paris                           | Marion Barbet, Sylvie Behillil, Méline Bizard, Angela Brisebarre, Camille Capel, Etienne Simon-Lorière, Vincent Enouf, Maud Vanpeene, Sylvie van der Werf, Rousset (Guy) Dominique                                                                                                  |
| EPI_ISL_1005684                                                                     | Cerballiance Monthléry                                                                                                          | Cerba                                                                                                              | Collin T, Lesenne A, Olivi M, Ricard B, Benazra M, Delaplace E, Gresset N, Haim-Boukobza S, Trombert-Paolantoni S, Lecorche E, Roquebert B                                                                                                                                          |
| EPI_ISL_1005685                                                                     | Cerballiance Monthléry                                                                                                          | Cerba                                                                                                              | Collin T, Lesenne A, Olivi M, Ricard B, Benazra M, Delaplace E, Gresset N, Trombert-Paolantoni S, Lecorche E, Haim-Boukobza S, Roquebert B                                                                                                                                          |
| EPI_ISL_1008714                                                                     | Unidad de Patología Clínica                                                                                                     | Instituto de diagnóstico y Referencia Epidemiológicos (INDRE) Departamento de Virología                            | Claudia Wong-Arambula, Abril Rodríguez-Maldonado, Fabiola Garcés-Ayala, Natividad Cruz-Ortiz, Tatiana Nunez-Garcia, Gisela Barrera-Badillo, Lucia Hernandez-Rivas, Irma Lopez-Martinez, Ernesto Ramirez-Gonzalez.                                                                   |
| EPI_ISL_1012923                                                                     | Department of Infectious Diseases, Istituto Superiore di Sanità, Rome, Italy; ASST Sette Laghi, Varese, Italy                   | Istituto Superiore di Sanità (ISS)                                                                                 | Paola Stefanelli, Angela Di Martino, Alessandra Lo Presti, Stefano Fiore, Antonella Mencacci, Barbara Camilloni, Manuela Marra, Maria Carollo, Marco Crescenzi                                                                                                                      |
| EPI_ISL_1014338                                                                     | Dutch COVID-19 response team                                                                                                    | National Institute for Public Health and the Environment (RIVM)                                                    | Adam Meijer, Harry Vennema, Dirk Eggink, Jeroen Cremer, Sharon van den Brink, Bas van der Veer, AnneMarie van den Brandt, Florian Zwagemaker, Dennis Schmitz, Chantal Reusken, on behalf of the national COVID-19 response team                                                     |
| EPI_ISL_1014545                                                                     | Department of Infectious Diseases, Istituto Superiore di Sanità, Rome, Italy; Università degli Studi di Perugia, Perugia, Italy | Istituto Superiore di Sanità (ISS)                                                                                 | Paola Stefanelli, Alessandra Lo Presti, Angela Di Martino, Stefano Fiore, Antonella Mencacci, Barbara Camilloni, Manuela Marra, Maria Carollo, Marco Crescenzi                                                                                                                      |
| EPI_ISL_1014675                                                                     | Department of Infectious Diseases, Istituto Superiore di Sanità, Rome, Italy; Università degli Studi di Perugia, Perugia, Italy | Istituto Superiore di Sanità (ISS)                                                                                 | Paola Stefanelli, Alessandra Lo Presti, Angela Di Martino, Stefano Fiore, Antonella Mencacci, Barbara Camilloni, Manuela Marra, Maria Carollo, Marco Crescenzi, Luca De Sabato                                                                                                      |
| EPI_ISL_1014940                                                                     | Algemeen Klinisch Labo Lier                                                                                                     | KU Leuven, Rega Institute, Clinical and Epidemiological Virology                                                   | Tony Wawina-Bokalanga, Bert Vanmechelen, Joan Marti-Carerras, Piet Maes                                                                                                                                                                                                             |
| EPI_ISL_1015531                                                                     | Synlab                                                                                                                          | GIGA Medical Genomics                                                                                              | Keith Durkin, Maria Artesi, Sébastien Bontems, Raphaël Boreux, Bouchra Boujemla, Cécile Meex, Pierrette Melin, Marie-Pierre Hayette, Vincent Bours                                                                                                                                  |
| EPI_ISL_1015571                                                                     | Maryland Public Health Laboratory                                                                                               | Maryland Department of Health Laboratories Administration                                                          |                                                                                                                                                                                                                                                                                     |
| EPI_ISL_1023524                                                                     | Ospedale San Camillo De Lellis di Rieti                                                                                         | INMI Lazzaro Spallanzani IRCCS                                                                                     | Cesare E.M. Gruber, Barbara Bartolini, Emanuela Giombini, Francesco Messina, Martina Rueca, Ornella Butera, Stefano Venarubea, Luca Casertano, Luisa Marchioni, Antonino Di Caro, Maria R. Capobianchi                                                                              |
| EPI_ISL_1034144                                                                     | MEDICO COMPETENTE P.O. L'AQUILA                                                                                                 | Istituto Zooprofilattico Sperimentale dell'Abruzzo e Molise *G. Caporale*                                          | Lorusso A, Marcacci M, Di Domenico M, Ancora M, Curini V, Mangone I, Rinaldi A, Scialabba S, Di Pasquale A, Cammà C, Puglia I, Calistri P, Savini G                                                                                                                                 |
| EPI_ISL_1034304, EPI_ISL_1034306                                                    | Laboratorio de Ecologia de Doencas Transmissíveis na Amazonia, Instituto Leonidas e Maria Deane - Fiocruz Amazonia              | Laboratorio de Ecologia de Doencas Transmissíveis na Amazonia, Instituto Leonidas e Maria Deane - Fiocruz Amazonia | Valdinete Nascimento, Victor Souza, André Corado, Fernanda Nascimento, George Silva, Ágatha Costa, Debora Duarte, Karina Pessoa, Matilde Mejia, Luciana Gonçalves, Maria Júlia Brandão, Michele Jesus, Felipe Naveca on behalf of the Fiocruz COVID-19 Genomic Surveillance Network |
| EPI_ISL_1035203                                                                     | Dutch COVID-19 response team                                                                                                    | National Institute for Public Health and the Environment (RIVM)                                                    | Adam Meijer, Harry Vennema, Dirk Eggink, Jeroen Cremer, Sharon van den Brink, Bas van der Veer, AnneMarie van den Brandt, Florian Zwagemaker, Dennis Schmitz, Chantal Reusken, on behalf of the national COVID-19 response team                                                     |
| EPI_ISL_1035871, EPI_ISL_1035900                                                    | Department of Infectious Diseases, Istituto Superiore di Sanità, Rome, Italy; Università degli Studi di Siena, Siena, Italy     | Istituto Superiore di Sanità (ISS)                                                                                 | Paola Stefanelli, Angela Di Martino, Alessandra Lo Presti, Stefano Fiore, Maria Grazia Cusi, Gabriele Anichini, Claudia Gandolfo, Gianni Gori Savellini, Manuela Marra, Maria Carollo, Marco Crescenzi                                                                              |
| EPI_ISL_1036239                                                                     | Center of Advanced Studies and Technology, Molecular Genetics Laboratory                                                        | Center of Advanced Studies and Technology, Molecular Genetics Laboratory                                           | Ferrante Rossella, Mandatori Domitilla, De Fabritiis Simone, Damiani Verena, Anaclerio Federico                                                                                                                                                                                     |
| EPI_ISL_1036621, EPI_ISL_1039161                                                    | Platform BIS UZA/UAntwerpen                                                                                                     | UAntwerp, Laboratory of Medical Microbiology                                                                       | Basil Britto Xavier, Jasmine Coppens, Marie Le Mercier, Christine Lammens, Veerle Matheussen, Herman Goossens                                                                                                                                                                       |
| EPI_ISL_1039691, EPI_ISL_1039692, EPI_ISL_1039693, EPI_ISL_1039694, EPI_ISL_1039695 | LACEN do Estado de Goias                                                                                                        | Instituto Adolfo Lutz, Interdisciplinary Procedures Center, Strategic Laboratory                                   | Claudio Tavares Sacchi, Cláudia Regina Gonçalves, Erica Valessa Ramos Gomes, Karoline Rodrigues Campos                                                                                                                                                                              |
| EPI_ISL_1039785                                                                     | Ospedale "F. Spaziani" Frosinone                                                                                                | INMI Lazzaro Spallanzani IRCCS                                                                                     | B Bartolini, E Giombini, C.E.M Gruber, F Messina, M Rueca, O Butera, C. Gargiulo, C Sias, R Pulselli, A Di Caro, MR Capobianchi                                                                                                                                                     |
| EPI_ISL_1039956                                                                     | Platform BIS UZA/UAntwerpen                                                                                                     | UAntwerp, Laboratory of Medical Microbiology                                                                       | Basil Britto Xavier, Jasmine Coppens, Marie Le Mercier, Christine Lammens, Veerle Matheussen, Herman Goossens                                                                                                                                                                       |
| EPI_ISL_1040362, EPI_ISL_1040363                                                    | University Hospitals of Geneva, Laboratory of Virology                                                                          | HUG, Laboratory of Virology and the Health2030 Genome Center                                                       | Samuel Cordey, Ana Rita Goncalves, Laurent Kaiser, Lorenzo Cerutti, Henri Pegeot, Melyssa Elies, Deborah Penet, Keith Harshman, Ioannis Xenarios, Emmanouil Dermitzakis                                                                                                             |
| EPI_ISL_1041509                                                                     | LACEN do Estado de Goias                                                                                                        | Instituto Adolfo Lutz, Interdisciplinary Procedures Center, Strategic Laboratory                                   | Claudio Tavares Sacchi, Cláudia Regina Gonçalves, Erica Valessa Ramos Gomes, Karoline Rodrigues Campos                                                                                                                                                                              |
| EPI_ISL_1046769                                                                     | SARS-CoV-2 testing team, National Institute of Infectious Diseases                                                              | Pathogen Genomics Center, National Institute of Infectious Diseases                                                | Tsuyoshi Sekizuka, Kentaro Itokawa, Rina Tanaka, Masanori Hashino, Koichi Ishikawa, Midori Nakamura-Hoshi, Shigeru Kusagawa, Makoto Kuroda                                                                                                                                          |
| EPI_ISL_1055003                                                                     | unknown                                                                                                                         | Instituto Nacional de Saude (INSA)                                                                                 | Borges et al                                                                                                                                                                                                                                                                        |
| EPI_ISL_1055106                                                                     | National Virus Reference Laboratory                                                                                             | National Virus Reference Laboratory                                                                                | Zoe Yandle, Gabriel Gonzalez, Michael Carr, Jonathan Dean, Cillian F De Gascun                                                                                                                                                                                                      |
| EPI_ISL_1061282                                                                     | Alaska State Virology Laboratory                                                                                                | Alaska State Virology Laboratory                                                                                   | Stephanie DeRonde, Lisa Smith, Ph.D., Jack Chen, Ph.D.                                                                                                                                                                                                                              |
| EPI_ISL_1061413                                                                     | Istanbul University-Cerrahpasa, Cerrahpasa School of Medicine, COVID-19 Laboratory                                              | Istanbul University-Cerrahpasa, Cerrahpasa School of Medicine, COVID-19 Laboratory                                 | Mert Ahmet Kuskucu, Yesim Tuyji Tok, Okan Kadir Nohut, Zarifa Abullayeva, Ebru Yucebag, Fusun Can, Serap imek Yavuz, Haluk Eraksoy, Kenan Midilli                                                                                                                                   |
| EPI_ISL_1063909                                                                     | Laboratorio Genzano - ASL RM 6                                                                                                  | INMI Lazzaro Spallanzani IRCCS                                                                                     | B Bartolini, O Butera, C.E.M Gruber, M Rueca, F Messina, E Giombini, G Tramini, E Conti, MR Capobianchi, A Di Caro                                                                                                                                                                  |
| EPI_ISL_1063910                                                                     | Ospedale San Filippo Neri                                                                                                       | INMI Lazzaro Spallanzani IRCCS                                                                                     | M Rueca, O Butera, F Messina, CEM Gruber, B Bartolini, E Giombini, M Melandri, ML Schiavone, A Di Caro, MR Capobianchi                                                                                                                                                              |
| EPI_ISL_1063969                                                                     | Ministry of Health Turkey                                                                                                       | Ministry of Health Turkey                                                                                          | Fatma Bayrakdar, Yasemin Cogun, Süleyman Yalcin, Aye Baak Alta, Gülay Korukluolu                                                                                                                                                                                                    |
| EPI_ISL_1067728                                                                     | Center for Biotechnology and Cell Therapy, São Rafael Hospital, Salvador, Brazil                                                | Central Public Health Laboratory - LACEN -Bahia, Salvador, Brazil                                                  | Stephane Tosta, Luciana Oliveira, Vanessa Nardy, Patricia Cajado, Marcela Gómez, Breno Dominguez, Jaqueline Gomes, Vagner Fonseca, Marta Giovanetti, Luiz Alcantara, Felicidade Pereira, Arabela Leal                                                                               |
| EPI_ISL_1067729, EPI_ISL_1067730, EPI_ISL_1067731                                   | Central Public Health Laboratory - LACEN -Bahia, Salvador, Brazil                                                               | Central Public Health Laboratory - LACEN -Bahia, Salvador, Brazil                                                  | Stephane Tosta, Luciana Oliveira, Vanessa Nardy, Patricia Cajado, Marcela Gómez, Breno Dominguez, Jaqueline Gomes, Vagner Fonseca, Marta Giovanetti, Luiz Alcantara, Felicidade Pereira, Arabela Leal                                                                               |

|                                                                                                                                                                                                                                                                                                                                                                                                                                                                                                                                                                                                                                                                                                                                                                                                                                                                                  |                                                                                                                    |                                                                                                                                            |                                                                                                                                                                                                                                                                                     |
|----------------------------------------------------------------------------------------------------------------------------------------------------------------------------------------------------------------------------------------------------------------------------------------------------------------------------------------------------------------------------------------------------------------------------------------------------------------------------------------------------------------------------------------------------------------------------------------------------------------------------------------------------------------------------------------------------------------------------------------------------------------------------------------------------------------------------------------------------------------------------------|--------------------------------------------------------------------------------------------------------------------|--------------------------------------------------------------------------------------------------------------------------------------------|-------------------------------------------------------------------------------------------------------------------------------------------------------------------------------------------------------------------------------------------------------------------------------------|
| EPI_ISL_1067732                                                                                                                                                                                                                                                                                                                                                                                                                                                                                                                                                                                                                                                                                                                                                                                                                                                                  | Center for Biotechnology and Cell Therapy, São Rafael Hospital, Salvador, Brazil                                   | Central Public Health Laboratory - LACEN -Bahia, Salvador, Brazil                                                                          | Stephane Tosta, Luciana Oliveira, Vanessa Nardy,Patricia Cajado,Marcela Gómez, Breno Dominguez, Jaqueline Gomes, Vagner Fonseca,Marta Giovanetti,Luiz Alcantara, Felicidade Pereira, Arabela Leal                                                                                   |
| EPI_ISL_1067733, EPI_ISL_1067734, EPI_ISL_1067735                                                                                                                                                                                                                                                                                                                                                                                                                                                                                                                                                                                                                                                                                                                                                                                                                                | Central Public Health Laboratory - LACEN -Bahia, Salvador, Brazil                                                  | Central Public Health Laboratory - LACEN -Bahia, Salvador, Brazil                                                                          | Stephane Tosta, Luciana Oliveira, Vanessa Nardy,Patricia Cajado,Marcela Gómez, Breno Dominguez, Jaqueline Gomes, Vagner Fonseca,Marta Giovanetti,Luiz Alcantara, Felicidade Pereira, Arabela Leal                                                                                   |
| EPI_ISL_1067736                                                                                                                                                                                                                                                                                                                                                                                                                                                                                                                                                                                                                                                                                                                                                                                                                                                                  | Center for Biotechnology and Cell Therapy, São Rafael Hospital, Salvador, Brazil                                   | Central Public Health Laboratory - LACEN -Bahia, Salvador, Brazil                                                                          | Stephane Tosta, Luciana Oliveira, Vanessa Nardy,Patricia Cajado,Marcela Gómez, Breno Dominguez, Jaqueline Gomes, Vagner Fonseca,Marta Giovanetti,Luiz Alcantara, Felicidade Pereira, Arabela Leal                                                                                   |
| EPI_ISL_1067737, EPI_ISL_1067738                                                                                                                                                                                                                                                                                                                                                                                                                                                                                                                                                                                                                                                                                                                                                                                                                                                 | Central Public Health Laboratory - LACEN -Bahia, Salvador, Brazil                                                  | Central Public Health Laboratory - LACEN -Bahia, Salvador, Brazil                                                                          | Stephane Tosta, Luciana Oliveira, Vanessa Nardy,Patricia Cajado,Marcela Gómez, Breno Dominguez, Jaqueline Gomes, Vagner Fonseca,Marta Giovanetti,Luiz Alcantara, Felicidade Pereira, Arabela Leal                                                                                   |
| EPI_ISL_1068110, EPI_ISL_1068111, EPI_ISL_1068112, EPI_ISL_1068114, EPI_ISL_1068149, EPI_ISL_1068150, EPI_ISL_1068151, EPI_ISL_1068154, EPI_ISL_1068156, EPI_ISL_1068157, EPI_ISL_1068158, EPI_ISL_1068159, EPI_ISL_1068160, EPI_ISL_1068169, EPI_ISL_1068181, EPI_ISL_1068221, EPI_ISL_1068222, EPI_ISL_1068225, EPI_ISL_1068226, EPI_ISL_1068243, EPI_ISL_1068248, EPI_ISL_1068249, EPI_ISL_1068258, EPI_ISL_1068260, EPI_ISL_1068261, EPI_ISL_1068262, EPI_ISL_1068263, EPI_ISL_1068264, EPI_ISL_1068266, EPI_ISL_1068268, EPI_ISL_1068270, EPI_ISL_1068271, EPI_ISL_1068272, EPI_ISL_1068273, EPI_ISL_1068274, EPI_ISL_1068275, EPI_ISL_1068278, EPI_ISL_1068280, EPI_ISL_1068281, EPI_ISL_1068282, EPI_ISL_1068283, EPI_ISL_1068284, EPI_ISL_1068285, EPI_ISL_1068286, EPI_ISL_1068287, EPI_ISL_1068288, EPI_ISL_1068289, EPI_ISL_1068290, EPI_ISL_1068291, EPI_ISL_1068292 | Laboratorio de Ecologia de Doencas Transmissíveis na Amazonia, Instituto Leonidas e Maria Deane - Fiocruz Amazonia | Laboratorio de Ecologia de Doencas Transmissíveis na Amazonia, Instituto Leonidas e Maria Deane - Fiocruz Amazonia                         | Valdinete Nascimento, Victor Souza, André Corado, Fernanda Nascimento, George Silva, Ágatha Costa, Debora Duarte, Karina Pessoa, Matilde Mejía, Luciana Gonçalves, Maria Júlia Brandão, Michele Jesus, Felipe Naveca on behalf of the Fiocruz COVID-19 Genomic Surveillance Network |
| see above                                                                                                                                                                                                                                                                                                                                                                                                                                                                                                                                                                                                                                                                                                                                                                                                                                                                        | Laboratorio de Ecologia de Doencas Transmissíveis na Amazonia, Instituto Leonidas e Maria Deane - Fiocruz Amazonia | Laboratorio de Ecologia de Doencas Transmissíveis na Amazonia, Instituto Leonidas e Maria Deane - Fiocruz Amazonia                         | Valdinete Nascimento, Victor Souza, André Corado, Fernanda Nascimento, George Silva, Ágatha Costa, Debora Duarte, Karina Pessoa, Matilde Mejía, Luciana Gonçalves, Maria Júlia Brandão, Michele Jesus, Felipe Naveca on behalf of the Fiocruz COVID-19 Genomic Surveillance Network |
| EPI_ISL_1076418                                                                                                                                                                                                                                                                                                                                                                                                                                                                                                                                                                                                                                                                                                                                                                                                                                                                  | SYNLAB - Laboratoire J. Collard                                                                                    | GIGA Medical Genomics                                                                                                                      | Keith Durkin, Maria Artesi, Sébastien Bontems, Raphaël Boreux, Bouchra Boujemla, Nathalie Renotte, Cécile Meex, Pierrette Melin, Marie-Pierre Hayette, Vincent Bours                                                                                                                |
| EPI_ISL_1076419, EPI_ISL_1076421                                                                                                                                                                                                                                                                                                                                                                                                                                                                                                                                                                                                                                                                                                                                                                                                                                                 | Department of Clinical Microbiology                                                                                | GIGA Medical Genomics                                                                                                                      | Keith Durkin, Maria Artesi, Sébastien Bontems, Raphaël Boreux, Bouchra Boujemla, Nathalie Renotte, Cécile Meex, Pierrette Melin, Marie-Pierre Hayette, Vincent Bours                                                                                                                |
| EPI_ISL_1078954                                                                                                                                                                                                                                                                                                                                                                                                                                                                                                                                                                                                                                                                                                                                                                                                                                                                  | Houston Methodist Hospital                                                                                         | Houston Methodist Hospital                                                                                                                 | S. Wesley Long, Randall J. Olsen, Paul A. Christensen, Sishir Subedi, Robert Olson, James J. Davis, Matthew Ojeda Saavedra, Prasanti Yerramilli, Layne Pruitt, Kristina Reppond, Madison N. Shyer, Jessica Cambric, Ilya J. Finkelstein, Jimmy Gollihar, and James M. Musser        |
| EPI_ISL_1078992, EPI_ISL_1079002, EPI_ISL_1079008, EPI_ISL_1079162                                                                                                                                                                                                                                                                                                                                                                                                                                                                                                                                                                                                                                                                                                                                                                                                               | IAL Regional de Bauru                                                                                              | Instituto Adolfo Lutz, Interdisciplinary Procedures Center, Strategic Laboratory                                                           | Claudio Tavares Sacchi, Claudia Regina Gonçalves, Erica Valessa Ramos Gomes, Karoline Rodrigues Campos                                                                                                                                                                              |
| EPI_ISL_1079206, EPI_ISL_1079246, EPI_ISL_1079917                                                                                                                                                                                                                                                                                                                                                                                                                                                                                                                                                                                                                                                                                                                                                                                                                                | Houston Methodist Hospital                                                                                         | Houston Methodist Hospital                                                                                                                 | S. Wesley Long, Randall J. Olsen, Paul A. Christensen, Sishir Subedi, Robert Olson, James J. Davis, Matthew Ojeda Saavedra, Prasanti Yerramilli, Layne Pruitt, Kristina Reppond, Madison N. Shyer, Jessica Cambric, Ilya J. Finkelstein, Jimmy Gollihar, and James M. Musser        |
| EPI_ISL_1084042, EPI_ISL_1084155                                                                                                                                                                                                                                                                                                                                                                                                                                                                                                                                                                                                                                                                                                                                                                                                                                                 | Lighthouse Lab in Milton Keynes                                                                                    | Wellcome Sanger Institute for the COVID-19 Genomics UK (COG-UK) Consortium                                                                 | The Lighthouse Lab in Milton Keynes and Alex Alderton, Roberto Amato, Jeffrey Barrett, Sonia Gonçalves, Ewan Harrison, David K. Jackson, Ian Johnston, Dominic Kwiatkowski, Cordelia Langford, John Sillitoe on behalf of the Wellcome Sanger Institute COVID-19 Surveillance Team  |
| EPI_ISL_1084930, EPI_ISL_1084931                                                                                                                                                                                                                                                                                                                                                                                                                                                                                                                                                                                                                                                                                                                                                                                                                                                 | University Hospitals of Geneva, Laboratory of Virology                                                             | HUG, Laboratory of Virology and the Health2030 Genome Center                                                                               | Samuel Cordey, Ana Rita Goncalves, Laurent Kaiser, Lorenzo Cerutti, Henri Pegeot, Melysa Elies, Deborah Penet, Keith Harshman, Ioannis Xenarios, Emmanouil Dermizakis                                                                                                               |
| EPI_ISL_1085358                                                                                                                                                                                                                                                                                                                                                                                                                                                                                                                                                                                                                                                                                                                                                                                                                                                                  | CH.INTERCOMMUNAL DE CRETEIL                                                                                        | Department of Virology, Henri Mondor University Hospital, Assistance Publique Hôpitaux de Paris, Université Paris-Est Créteil, INSERM U955 | Christophe Rodriguez, Slim Fourati, Vanessa Demontant, Guillaume Gricourt, Melissa N'Debi, Alexandre Soulier, Elisabeth Trawinski, Jean-Michel Pawlotsky                                                                                                                            |
| EPI_ISL_1085359                                                                                                                                                                                                                                                                                                                                                                                                                                                                                                                                                                                                                                                                                                                                                                                                                                                                  | laboratoire Belle Epine                                                                                            | Department of Virology, Henri Mondor University Hospital, Assistance Publique Hôpitaux de Paris, Université Paris-Est Créteil, INSERM U955 | Christophe Rodriguez, Slim Fourati, Vanessa Demontant, Guillaume Gricourt, Melissa N'Debi, Alexandre Soulier, Elisabeth Trawinski, Jean-Michel Pawlotsky                                                                                                                            |
| EPI_ISL_1085912                                                                                                                                                                                                                                                                                                                                                                                                                                                                                                                                                                                                                                                                                                                                                                                                                                                                  | CH.INTERCOMMUNAL DE CRETEIL                                                                                        | Department of Virology, Henri Mondor University Hospital, Assistance Publique Hôpitaux de Paris, Université Paris-Est Créteil, INSERM U955 | Christophe Rodriguez, Slim Fourati, Vanessa Demontant, Guillaume Gricourt, Melissa N'Debi, Alexandre Soulier, Elisabeth Trawinski, Jean-Michel Pawlotsky                                                                                                                            |
| EPI_ISL_1086034                                                                                                                                                                                                                                                                                                                                                                                                                                                                                                                                                                                                                                                                                                                                                                                                                                                                  | Diagnosticos da America - DASA                                                                                     | Instituto Adolfo Lutz, Interdisciplinary Procedures Center, Strategic Laboratory                                                           | Claudio Tavares Sacchi, Claudia Regina Gonçalves, Erica Valessa Ramos Gomes, Karoline Rodrigues Campos, Caio Vinicius Dias Lopes                                                                                                                                                    |
| EPI_ISL_1086035, EPI_ISL_1086036                                                                                                                                                                                                                                                                                                                                                                                                                                                                                                                                                                                                                                                                                                                                                                                                                                                 | IAL Regional de Bauru                                                                                              | Instituto Adolfo Lutz, Interdisciplinary Procedures Center, Strategic Laboratory                                                           | Claudio Tavares Sacchi, Claudia Regina Gonçalves, Erica Valessa Ramos Gomes, Karoline Rodrigues Campos, Caio Vinicius Dias Lopes                                                                                                                                                    |
| EPI_ISL_1086037, EPI_ISL_1086038, EPI_ISL_1086039, EPI_ISL_1086040, EPI_ISL_1086041, EPI_ISL_1086042, EPI_ISL_1086043                                                                                                                                                                                                                                                                                                                                                                                                                                                                                                                                                                                                                                                                                                                                                            | Diagnosticos da America - DASA                                                                                     | Instituto Adolfo Lutz, Interdisciplinary Procedures Center, Strategic Laboratory                                                           | Claudio Tavares Sacchi, Claudia Regina Gonçalves, Erica Valessa Ramos Gomes, Karoline Rodrigues Campos, Caio Vinicius Dias Lopes                                                                                                                                                    |
| EPI_ISL_1086044, EPI_ISL_1086045, EPI_ISL_1086046, EPI_ISL_1086047, EPI_ISL_1086048, EPI_ISL_1086049                                                                                                                                                                                                                                                                                                                                                                                                                                                                                                                                                                                                                                                                                                                                                                             | IAL Regional de Bauru                                                                                              | Instituto Adolfo Lutz, Interdisciplinary Procedures Center, Strategic Laboratory                                                           | Claudio Tavares Sacchi, Claudia Regina Gonçalves, Erica Valessa Ramos Gomes, Karoline Rodrigues Campos, Caio Vinicius Dias Lopes                                                                                                                                                    |
| EPI_ISL_1091365, EPI_ISL_1091366                                                                                                                                                                                                                                                                                                                                                                                                                                                                                                                                                                                                                                                                                                                                                                                                                                                 | KU Leuven, Rega Institute, Clinical and Epidemiological Virology                                                   | KU Leuven, Rega Institute, Clinical and Epidemiological Virology                                                                           | Tony Wawina-Bokalanga, Bert Vanmechelen, Joan Marti-Carerras, Piet Maes                                                                                                                                                                                                             |
| EPI_ISL_1091787                                                                                                                                                                                                                                                                                                                                                                                                                                                                                                                                                                                                                                                                                                                                                                                                                                                                  | San Gallicano Dermatological Institute I.F.O.                                                                      | INMI Lazzaro Spallanzani IRCCS                                                                                                             | B Bartolini, E Giombini, F Messina, M Rueca, O Butera, CEM Gruber, F Pimpinelli, F Ensoli, G Prignano, A Di Caro, MR Capobianchi                                                                                                                                                    |
| EPI_ISL_1091790                                                                                                                                                                                                                                                                                                                                                                                                                                                                                                                                                                                                                                                                                                                                                                                                                                                                  | San Gallicano Dermatological Institute I.F.O.                                                                      | INMI Lazzaro Spallanzani IRCCS                                                                                                             | M Rueca, O Butera, CEM Gruber, B Bartolini, E Giombini, F Messina, F Pimpinelli, F Ensoli, G D'Agosto, A Di Caro, MR Capobianchi                                                                                                                                                    |
| EPI_ISL_1091794                                                                                                                                                                                                                                                                                                                                                                                                                                                                                                                                                                                                                                                                                                                                                                                                                                                                  | Ospedale "F. Spaziani" Frosinone                                                                                   | INMI Lazzaro Spallanzani IRCCS                                                                                                             | F Messina, M Rueca, O Butera, CEM Gruber, B Bartolini, E Giombini, R Pulselli, C Sias, G Brocco, MR Capobianchi, A Di Caro                                                                                                                                                          |
| EPI_ISL_1091797                                                                                                                                                                                                                                                                                                                                                                                                                                                                                                                                                                                                                                                                                                                                                                                                                                                                  | Azienda Ospedaliera San Camillo Forlanini                                                                          | INMI Lazzaro Spallanzani IRCCS                                                                                                             | M Rueca, O Butera, CEM Gruber, B Bartolini, E Giombini, F Messina, G Parisi, D Gallone, F Basile, A Di Caro, MR Capobianchi                                                                                                                                                         |
| EPI_ISL_1091798                                                                                                                                                                                                                                                                                                                                                                                                                                                                                                                                                                                                                                                                                                                                                                                                                                                                  | Synlab Lazio S.r.l.                                                                                                | INMI Lazzaro Spallanzani IRCCS                                                                                                             | E Giombini, F Messina, M Rueca, O Butera, CEM Gruber, B Bartolini, E Trappolini, SA Santini, A Di Caro, MR Capobianchi                                                                                                                                                              |
| EPI_ISL_1093256                                                                                                                                                                                                                                                                                                                                                                                                                                                                                                                                                                                                                                                                                                                                                                                                                                                                  | KU Leuven, Rega Institute, Clinical and Epidemiological Virology                                                   | KU Leuven, Rega Institute, Clinical and Epidemiological Virology                                                                           | Tony Wawina-Bokalanga, Bert Vanmechelen, Joan Marti-Carerras, Piet Maes                                                                                                                                                                                                             |
| EPI_ISL_1095384, EPI_ISL_1095449                                                                                                                                                                                                                                                                                                                                                                                                                                                                                                                                                                                                                                                                                                                                                                                                                                                 | Laboratorio Microbiologia e Virologia P.O. Cotugno A.O. dei Colli                                                  | Laboratorio Microbiologia e Virologia P.O. Cotugno A.O. dei Colli                                                                          | Luigi Atripaldi, Claudia Tiberio, Anna Perfetti, Pellegrino Cerino, Biancamaria Pierri, Maria Concetta Cuomo                                                                                                                                                                        |
| EPI_ISL_1096120                                                                                                                                                                                                                                                                                                                                                                                                                                                                                                                                                                                                                                                                                                                                                                                                                                                                  | IAL Regional de Bauru                                                                                              | Instituto Adolfo Lutz, Interdisciplinary Procedures Center, Strategic Laboratory                                                           | Claudio Tavares Sacchi, Claudia Regina Gonçalves, Erica Valessa Ramos Gomes, Karoline Rodrigues Campos, Caio Vinicius Dias Lopes                                                                                                                                                    |
| EPI_ISL_1096121                                                                                                                                                                                                                                                                                                                                                                                                                                                                                                                                                                                                                                                                                                                                                                                                                                                                  | Diagnosticos da America - DASA                                                                                     | Instituto Adolfo Lutz, Interdisciplinary Procedures Center, Strategic Laboratory                                                           | Claudio Tavares Sacchi, Claudia Regina Gonçalves, Erica Valessa Ramos Gomes, Karoline Rodrigues Campos, Caio Vinicius Dias Lopes                                                                                                                                                    |
| EPI_ISL_1096122, EPI_ISL_1096124, EPI_ISL_1096125, EPI_ISL_1096127, EPI_ISL_1096131, EPI_ISL_1096132, EPI_ISL_1096134                                                                                                                                                                                                                                                                                                                                                                                                                                                                                                                                                                                                                                                                                                                                                            | IAL Regional de Bauru                                                                                              | Instituto Adolfo Lutz, Interdisciplinary Procedures Center, Strategic Laboratory                                                           | Claudio Tavares Sacchi, Claudia Regina Gonçalves, Erica Valessa Ramos Gomes, Karoline Rodrigues Campos, Caio Vinicius Dias Lopes                                                                                                                                                    |
| EPI_ISL_1096135                                                                                                                                                                                                                                                                                                                                                                                                                                                                                                                                                                                                                                                                                                                                                                                                                                                                  | Diagnosticos da America - DASA                                                                                     | Instituto Adolfo Lutz, Interdisciplinary Procedures Center, Strategic Laboratory                                                           | Claudio Tavares Sacchi, Claudia Regina Gonçalves, Erica Valessa Ramos Gomes, Karoline Rodrigues Campos, Caio Vinicius Dias Lopes                                                                                                                                                    |
| EPI_ISL_1096136                                                                                                                                                                                                                                                                                                                                                                                                                                                                                                                                                                                                                                                                                                                                                                                                                                                                  | IAL Regional de Bauru                                                                                              | Instituto Adolfo Lutz, Interdisciplinary Procedures Center, Strategic Laboratory                                                           | Claudio Tavares Sacchi, Claudia Regina Gonçalves, Erica Valessa Ramos Gomes, Karoline Rodrigues Campos, Caio Vinicius Dias Lopes                                                                                                                                                    |

|                                                                                                                                                                                                                                                                                                                                                                                      |                                                                                                                         |                                                                                                                                   |                                                                                                                                                                                                                                                                                                                                                                     |
|--------------------------------------------------------------------------------------------------------------------------------------------------------------------------------------------------------------------------------------------------------------------------------------------------------------------------------------------------------------------------------------|-------------------------------------------------------------------------------------------------------------------------|-----------------------------------------------------------------------------------------------------------------------------------|---------------------------------------------------------------------------------------------------------------------------------------------------------------------------------------------------------------------------------------------------------------------------------------------------------------------------------------------------------------------|
| EPI_ISL_1096262                                                                                                                                                                                                                                                                                                                                                                      | Outre mer                                                                                                               | National Reference Center for Viruses of Respiratory Infections, Institut Pasteur, Paris                                          | Marion Barbet, Sylvie Behillil, Méline Bizard, Angela Brisebarre, Camille Capel, Etienne Simon-Lorière, Vincent Enouf, Maud Vanpeene, Sylvie van der Werf, Rousset Dominique                                                                                                                                                                                        |
| EPI_ISL_1096962                                                                                                                                                                                                                                                                                                                                                                      | ASL Napoli 1 Centro                                                                                                     | AMES Centro Poldiagnostico Strumentale S.r.l.                                                                                     | "Giovanni Savarese, Raffaella Ruggiero, Eloisa Evangelista, Antonella Di Carlo, Luisa Circelli, Luigi D'Amore, Roberto Sirica, Antonio Fico"                                                                                                                                                                                                                        |
| EPI_ISL_1098878                                                                                                                                                                                                                                                                                                                                                                      | Jessa                                                                                                                   | Jessa                                                                                                                             | Cruys et al. on behalf of the Jessa_cmdLab                                                                                                                                                                                                                                                                                                                          |
| EPI_ISL_1103616, EPI_ISL_1103617                                                                                                                                                                                                                                                                                                                                                     | KU Leuven, Rega Institute, Clinical and Epidemiological Virology                                                        | KU Leuven, Rega Institute, Clinical and Epidemiological Virology                                                                  | Tony Wawina-Bokalanga, Bert Vanmechelen, Joan Marti-Carerras, Piet Maes                                                                                                                                                                                                                                                                                             |
| EPI_ISL_1104214, EPI_ISL_1104216                                                                                                                                                                                                                                                                                                                                                     | Virology Department, Royal Infirmary of Edinburgh, NHS Lothian / School of Biological Sciences, University of Edinburgh | COVID-19 Genomics UK (COG-UK) Consortium                                                                                          | McHugh M, Dewar R, Cotton S, Rooke S, O'Toole Á, Scher E, Hill V, McCrone JT, Colquhoun R, Yu X, Jackson B, Rambaut A, Templeton K                                                                                                                                                                                                                                  |
| EPI_ISL_1109859                                                                                                                                                                                                                                                                                                                                                                      | Lab voor klinische biologie                                                                                             | Lab voor klinische biologie                                                                                                       | Marija Janevska, Hannelore Hamerlinck, Bruno Verhasselt                                                                                                                                                                                                                                                                                                             |
| EPI_ISL_1111137, EPI_ISL_1111143, EPI_ISL_1111151, EPI_ISL_1111152, EPI_ISL_1111160, EPI_ISL_1111281, EPI_ISL_1111450, EPI_ISL_1111451, EPI_ISL_1111456, EPI_ISL_1111457, EPI_ISL_1111461, EPI_ISL_1111465, EPI_ISL_1111467, EPI_ISL_1111469, EPI_ISL_1111472, EPI_ISL_1111474, EPI_ISL_1111475, EPI_ISL_1111483, EPI_ISL_1111484, EPI_ISL_1111486, EPI_ISL_1111490, EPI_ISL_1111496 | Laboratorio de Referencia Nacional de Virus Respiratorio. Instituto Nacional de Salud Perú                              | Laboratorio de Referencia Nacional de Enteropatógenos. Instituto Nacional de Salud del Perú                                       | Ronnie Gavilan Chavez, Junior Caro Castro, Willi Quino Sifuentes, Veronica Hurtado Vela, Iris Silva Molina, Fiorella Orellana Peralta                                                                                                                                                                                                                               |
| see above                                                                                                                                                                                                                                                                                                                                                                            | Lighthouse Lab in Cambridge                                                                                             | Wellcome Sanger Institute for the COVID-19 Genomics UK (COG-UK) Consortium                                                        | Rob Howes, The Lighthouse Lab in Cambridge and Alex Alderton, Roberto Amato, Jeffrey Barrett, Sonia Goncalves, Ewan Harrison, David K. Jackson, Ian Johnston, Dominic Kwiatkowski, Cordelia Langford, John Sillitoe on behalf of the Wellcome Sanger Institute COVID-19 Surveillance Team                                                                           |
| EPI_ISL_1116310                                                                                                                                                                                                                                                                                                                                                                      | Instituto Nacional de Saude (INSA)                                                                                      | Instituto Nacional de Saude (INSA)                                                                                                | Borges et al                                                                                                                                                                                                                                                                                                                                                        |
| EPI_ISL_1117051                                                                                                                                                                                                                                                                                                                                                                      | SIESP DIP PREV CHIETI                                                                                                   | Istituto Zooprofilattico Sperimentale dell'Abruzzo e Molise "G. Caporale"                                                         | Lorusso A, Marcacci M, Di Domenico M, Ancora M, Curini V, Mangone I, Rinaldi A, Scialabba S, Di Pasquale A, Cammà C, Scialabba S, Puglia I, Calistri P, Savini G                                                                                                                                                                                                    |
| EPI_ISL_1117510, EPI_ISL_1117511, EPI_ISL_1117512, EPI_ISL_1117513                                                                                                                                                                                                                                                                                                                   | Viollier AG                                                                                                             | Department of Biosystems Science and Engineering, ETH Zürich                                                                      | Christian Beisel, Sarah Nadeau, Chaoran Chen, Ivan Topolsky, Philipp Jablonski, Lara Fuhrmann, David Dreifuss, Katharina Jahn, Rebecca Denes, Mirjam Feldkamp, Ina Nissen, Natascha Santacroce, Elodie Burcklen, Christiane Beckmann, Maurice Redondo, Olivier Kobel, Christoph Noppen, Sophie Seidel, Noemie Santamaria de Souza, Niko Beerenwinkel, Tanja Stadler |
| EPI_ISL_1119344                                                                                                                                                                                                                                                                                                                                                                      | SYNLAB - Laboratoire J. Collard                                                                                         | GIGA Medical Genomics                                                                                                             | Keith Durkin, Maria Artesi, Sébastien Bontems, Raphaël Boreux, Bouchra Boujemla, Nathalie Renotte, Cécile Meex, Pierrette Melin, Marie-Pierre Hayette, Vincent Bours                                                                                                                                                                                                |
| EPI_ISL_1121200                                                                                                                                                                                                                                                                                                                                                                      | Hospital E Antonio Policarpo de Oliveira                                                                                | Instituto Adolfo Lutz, Interdisciplinary Procedures Center, Strategic Laboratory                                                  | Claudio Tavares Sacchi, Claudia Regina Gonçalves, Erica Valessa Ramos Gomes, Karoline Rodrigues Campos, Caio Vinicius Dias Lopes                                                                                                                                                                                                                                    |
| EPI_ISL_1121307                                                                                                                                                                                                                                                                                                                                                                      | Hospital e Pronto Socorro Portinari                                                                                     | Instituto Adolfo Lutz, Interdisciplinary Procedures Center, Strategic Laboratory                                                  | Claudio Tavares Sacchi, Claudia Regina Gonçalves, Erica Valessa Ramos Gomes, Karoline Rodrigues Campos, Caio Vinicius Dias Lopes                                                                                                                                                                                                                                    |
| EPI_ISL_1121308                                                                                                                                                                                                                                                                                                                                                                      | UBS Jose Francisco Rezende                                                                                              | Instituto Adolfo Lutz, Interdisciplinary Procedures Center, Strategic Laboratory                                                  | Claudio Tavares Sacchi, Claudia Regina Gonçalves, Erica Valessa Ramos Gomes, Karoline Rodrigues Campos, Caio Vinicius Dias Lopes                                                                                                                                                                                                                                    |
| EPI_ISL_1121309                                                                                                                                                                                                                                                                                                                                                                      | IAL Regional de Bauru                                                                                                   | Instituto Adolfo Lutz, Interdisciplinary Procedures Center, Strategic Laboratory                                                  | Claudio Tavares Sacchi, Claudia Regina Gonçalves, Erica Valessa Ramos Gomes, Karoline Rodrigues Campos, Caio Vinicius Dias Lopes                                                                                                                                                                                                                                    |
| EPI_ISL_1121310                                                                                                                                                                                                                                                                                                                                                                      | Centro de Saude Il Dr. Jose Paione Mococa                                                                               | Instituto Adolfo Lutz, Interdisciplinary Procedures Center, Strategic Laboratory                                                  | Claudio Tavares Sacchi, Claudia Regina Gonçalves, Erica Valessa Ramos Gomes, Karoline Rodrigues Campos, Caio Vinicius Dias Lopes                                                                                                                                                                                                                                    |
| EPI_ISL_1121311                                                                                                                                                                                                                                                                                                                                                                      | IAL Regional de Bauru                                                                                                   | Instituto Adolfo Lutz, Interdisciplinary Procedures Center, Strategic Laboratory                                                  | Claudio Tavares Sacchi, Claudia Regina Gonçalves, Erica Valessa Ramos Gomes, Karoline Rodrigues Campos, Caio Vinicius Dias Lopes                                                                                                                                                                                                                                    |
| EPI_ISL_1121312, EPI_ISL_1121313, EPI_ISL_1121314, EPI_ISL_1121315                                                                                                                                                                                                                                                                                                                   | LACEN do Rio Grande do Sul                                                                                              | Instituto Adolfo Lutz, Interdisciplinary Procedures Center, Strategic Laboratory                                                  | Claudio Tavares Sacchi, Claudia Regina Gonçalves, Erica Valessa Ramos Gomes, Karoline Rodrigues Campos, Caio Vinicius Dias Lopes                                                                                                                                                                                                                                    |
| EPI_ISL_1121316                                                                                                                                                                                                                                                                                                                                                                      | Area of Virology, Serology and Virology Division (SAViD), New South Wales Health Pathology Randwick                     | Virology Research Laboratory; Area of Virology, Serology and Virology Division (SAViD), New South Wales Health Pathology Randwick | Foster, C.; Au, J.; Ruiz Silva, M.; Deveson, I.; Bull, R.; Van Hal, S.; Rawlinson, W.                                                                                                                                                                                                                                                                               |
| EPI_ISL_1121976                                                                                                                                                                                                                                                                                                                                                                      | Grupo Tecnico de Vigilancia Sanitaria e Epidemiologica                                                                  | Instituto Adolfo Lutz, Interdisciplinary Procedures Center, Strategic Laboratory                                                  | Claudio Tavares Sacchi, Claudia Regina Gonçalves, Erica Valessa Ramos Gomes, Karoline Rodrigues Campos, Caio Vinicius Dias Lopes                                                                                                                                                                                                                                    |
| EPI_ISL_1123373                                                                                                                                                                                                                                                                                                                                                                      | Florida Bureau of Public Health Laboratories                                                                            | Florida Bureau of Public Health Laboratories                                                                                      | Sarah Schmedes, Jason Blanton                                                                                                                                                                                                                                                                                                                                       |
| EPI_ISL_1132281                                                                                                                                                                                                                                                                                                                                                                      | Azienda Ospedaliero - Universitaria di Modena Policlinico - Virologia e Microbiologia Molecolare                        | Zooprofilattico Sperimentale dell'Emilia Romagna e della Lombardia (IZSLER), Risk Analysis and Genomic Epidemiology Unit          | Monica Pecorari, William Genari, Giulia Fregni Serpini, Marina Morganti, Ilaria Menozzi, Erika Scaltriti, Stefano Pongolini                                                                                                                                                                                                                                         |
| EPI_ISL_1132668                                                                                                                                                                                                                                                                                                                                                                      | IAL Regional de Ribeirao Preto                                                                                          | Instituto Adolfo Lutz, Interdisciplinary Procedures Center, Strategic Laboratory                                                  | Claudio Tavares Sacchi, Claudia Regina Gonçalves, Erica Valessa Ramos Gomes, Karoline Rodrigues Campos, Caio Vinicius Dias Lopes                                                                                                                                                                                                                                    |
| EPI_ISL_1139070                                                                                                                                                                                                                                                                                                                                                                      | amedes MVZ für Laboratoriumsmedizin Fürstfeldbruck                                                                      | Robert Koch Institute                                                                                                             | unknown                                                                                                                                                                                                                                                                                                                                                             |
| EPI_ISL_1147719                                                                                                                                                                                                                                                                                                                                                                      | LabKom - Labor Augsburg MVZ GmbH                                                                                        | Robert Koch Institute                                                                                                             | unknown                                                                                                                                                                                                                                                                                                                                                             |
| EPI_ISL_1150052                                                                                                                                                                                                                                                                                                                                                                      | SYNLAB MVZ Weiden                                                                                                       | Robert Koch Institute                                                                                                             | unknown                                                                                                                                                                                                                                                                                                                                                             |
| EPI_ISL_1150858                                                                                                                                                                                                                                                                                                                                                                      | Synlab MVZ Augsburg                                                                                                     | Robert Koch Institute                                                                                                             | unknown                                                                                                                                                                                                                                                                                                                                                             |
| EPI_ISL_1151490, EPI_ISL_1151505                                                                                                                                                                                                                                                                                                                                                     | Labor Lübeck bzw. Laborärztliche Gemeinschaftspraxis Lübeck                                                             | Robert Koch Institute                                                                                                             | unknown                                                                                                                                                                                                                                                                                                                                                             |
| EPI_ISL_1153503                                                                                                                                                                                                                                                                                                                                                                      | Synlab MVZ Augsburg                                                                                                     | Robert Koch Institute                                                                                                             | unknown                                                                                                                                                                                                                                                                                                                                                             |
| EPI_ISL_1153551                                                                                                                                                                                                                                                                                                                                                                      | LabKom - Labor Augsburg MVZ GmbH                                                                                        | Robert Koch Institute                                                                                                             | unknown                                                                                                                                                                                                                                                                                                                                                             |
| EPI_ISL_1154492                                                                                                                                                                                                                                                                                                                                                                      | Synlab MVZ Augsburg                                                                                                     | Robert Koch Institute                                                                                                             | unknown                                                                                                                                                                                                                                                                                                                                                             |
| EPI_ISL_1155793                                                                                                                                                                                                                                                                                                                                                                      | Northwestern Memorial Hospital                                                                                          | Northwestern University - Ozer Lab                                                                                                | Ramon Lorenzo-Redondo, Lacy M. Simons, Taylor J. Dean, Chad J. Achenbach, Lawrence J. Jennings, Chao Qi, Michael G. Ison, Judd F. Hultquist, Egon A. Ozer                                                                                                                                                                                                           |
| EPI_ISL_1157408                                                                                                                                                                                                                                                                                                                                                                      | Synlab MVZ Augsburg                                                                                                     | Robert Koch Institute                                                                                                             | unknown                                                                                                                                                                                                                                                                                                                                                             |
| EPI_ISL_1157727, EPI_ISL_1157733                                                                                                                                                                                                                                                                                                                                                     | UOC Microbiologia e Virologia, Azienda Ospedaliera Universitaria Senese, Siena, Italy                                   | Dipartimento di Biotecnologie Mediche                                                                                             | Maria Grazia Cusi, David Pinzauti, Claudia Gandolfo, Gabriele Anichini, Gianni Pozzi, Gianni Gori Savellini, Francesco Santoro                                                                                                                                                                                                                                      |
| EPI_ISL_1163690, EPI_ISL_1163691                                                                                                                                                                                                                                                                                                                                                     | Azienda USL Umbria 2                                                                                                    | Istituto Zooprofilattico Sperimentale dell'Abruzzo e Molise "G. Caporale"                                                         | Proietti A., Pistoni E., Lorusso A, Marcacci M, Di Domenico M, Ancora M, Curini V, Mangone I, Rinaldi A, Scialabba S, Di Pasquale A, Cammà C, Puglia I, Calistri P, Savini G                                                                                                                                                                                        |
| EPI_ISL_1163795, EPI_ISL_1163796, EPI_ISL_1163797                                                                                                                                                                                                                                                                                                                                    | see above                                                                                                               | see above                                                                                                                         | see above                                                                                                                                                                                                                                                                                                                                                           |
| EPI_ISL_1163814, EPI_ISL_1163815, EPI_ISL_1163817, EPI_ISL_1163818, EPI_ISL_1163819, EPI_ISL_1163820, EPI_ISL_1163821, EPI_ISL_1163822, EPI_ISL_1163824, EPI_ISL_1163825, EPI_ISL_1163827, EPI_ISL_1163828                                                                                                                                                                           | Università degli Studi di Perugia                                                                                       | Istituto Zooprofilattico Sperimentale dell'Abruzzo e Molise "G. Caporale"                                                         | Mencacci A., Camilloni B., Lorusso A, Marcacci M, Di Domenico M, Ancora M, Curini V, Mangone I, Rinaldi A, Scialabba S, Di Pasquale A, Cammà C, Puglia I, Calistri P, Savini G                                                                                                                                                                                      |

|                                                                                                                                                                                                            |                                                                                                                                      |                                                                                                                            |                                                                                                                                                                                                                                                                                                                                                                                                                                                                                                                                                                                                |
|------------------------------------------------------------------------------------------------------------------------------------------------------------------------------------------------------------|--------------------------------------------------------------------------------------------------------------------------------------|----------------------------------------------------------------------------------------------------------------------------|------------------------------------------------------------------------------------------------------------------------------------------------------------------------------------------------------------------------------------------------------------------------------------------------------------------------------------------------------------------------------------------------------------------------------------------------------------------------------------------------------------------------------------------------------------------------------------------------|
| EPI_ISL_1163830                                                                                                                                                                                            | Istituto Zooprofilattico Sperimentale Umbria e Marche "Togo Rosati"                                                                  | Istituto Zooprofilattico Sperimentale dell'Abruzzo e Molise "G. Caporale"                                                  | Biagetti M., Giammarioli M., Lorusso A, Marcacci M, Di Domenico M, Ancora M, Curini V, Mangone I, Rinaldi A, Scialabba S, Di Pasquale A, Cammà C, Puglia I, Calistri P, Savini G                                                                                                                                                                                                                                                                                                                                                                                                               |
| EPI_ISL_1164183                                                                                                                                                                                            | Clinical Microbiology, Nationwide Children's Hospital                                                                                | James Molecular Laboratory                                                                                                 | Huanayu Wang, Pam Snyder, Zachary Rudy, Dan Jones, Amy Leber                                                                                                                                                                                                                                                                                                                                                                                                                                                                                                                                   |
| EPI_ISL_1164754, EPI_ISL_1164755                                                                                                                                                                           | Azienda USL Umbria 2                                                                                                                 | Istituto Zooprofilattico Sperimentale dell'Abruzzo e Molise "G. Caporale"                                                  | Proietti A, Pistoni E, Lorusso A, Marcacci M, Di Domenico M, Ancora M, Curini V, Mangone I, Rinaldi A, Scialabba S, Di Pasquale A, Cammà C, Puglia I, Calistri P, Savini G                                                                                                                                                                                                                                                                                                                                                                                                                     |
| EPI_ISL_1164848                                                                                                                                                                                            | LHUB-ULB                                                                                                                             | UAntwerp, Laboratory of Medical Microbiology                                                                               | Basil Britto Xavier, Jasmine Coppens, Marie Le Mercier, Christine Lammens, Veerle Matheeußen, Herman Goossens                                                                                                                                                                                                                                                                                                                                                                                                                                                                                  |
| EPI_ISL_1164970, EPI_ISL_1164971                                                                                                                                                                           | LACEN - Laboratório Central de Saúde Pública do Ceará                                                                                | Evandro Chagas Institute                                                                                                   | Santos, M.C.; Silva, A.M.; Junior, W.D.C.; Barbagelata, L.S.; Ferreira, J.A.; Sousa, E.M.A.; da Silva, P.S.; Pinheiro, K.C.; L.C.; Sousa Junior, E.C.                                                                                                                                                                                                                                                                                                                                                                                                                                          |
| EPI_ISL_1164972                                                                                                                                                                                            | LACEN - Laboratório Central de Saúde Pública do Pará                                                                                 | Evandro Chagas Institute                                                                                                   | Santos, M.C.; Silva, A.M.; Junior, W.D.C.; Barbagelata, L.S.; Ferreira, J.A.; Sousa, E.M.A.; da Silva, P.S.; Pinheiro, K.C.; L.C.; Sousa Junior, E.C.                                                                                                                                                                                                                                                                                                                                                                                                                                          |
| EPI_ISL_1164973                                                                                                                                                                                            | LACEN - Laboratório Central de Saúde Pública do Ceará                                                                                | Evandro Chagas Institute                                                                                                   | Santos, M.C.; Silva, A.M.; Junior, W.D.C.; Barbagelata, L.S.; Ferreira, J.A.; Sousa, E.M.A.; da Silva, P.S.; Pinheiro, K.C.; L.C.; Sousa Junior, E.C.                                                                                                                                                                                                                                                                                                                                                                                                                                          |
| EPI_ISL_1164978                                                                                                                                                                                            | LACEN - Laboratório Central de Saúde Pública do Pará                                                                                 | Evandro Chagas Institute                                                                                                   | Santos, M.C.; Silva, A.M.; Junior, W.D.C.; Barbagelata, L.S.; Ferreira, J.A.; Sousa, E.M.A.; da Silva, P.S.; Pinheiro, K.C.; L.C.; Sousa Junior, E.C.                                                                                                                                                                                                                                                                                                                                                                                                                                          |
| EPI_ISL_1164980                                                                                                                                                                                            | LACEN - Laboratório Central de Saúde Pública do Ceará                                                                                | Evandro Chagas Institute                                                                                                   | Santos, M.C.; Silva, A.M.; Junior, W.D.C.; Barbagelata, L.S.; Ferreira, J.A.; Sousa, E.M.A.; da Silva, P.S.; Pinheiro, K.C.; L.C.; Sousa Junior, E.C.                                                                                                                                                                                                                                                                                                                                                                                                                                          |
| EPI_ISL_1164984                                                                                                                                                                                            | LACEN - Laboratório Central de Saúde Pública do Amapá                                                                                | Evandro Chagas Institute                                                                                                   | Santos, M.C.; Silva, A.M.; Junior, W.D.C.; Barbagelata, L.S.; Ferreira, J.A.; Sousa, E.M.A.; da Silva, P.S.; Pinheiro, K.C.; L.C.; Sousa Junior, E.C.                                                                                                                                                                                                                                                                                                                                                                                                                                          |
| EPI_ISL_1164991                                                                                                                                                                                            | LACEN - Laboratório Central de Saúde Pública do Paraíba                                                                              | Evandro Chagas Institute                                                                                                   | Santos, M.C.; Silva, A.M.; Junior, W.D.C.; Barbagelata, L.S.; Ferreira, J.A.; Sousa, E.M.A.; da Silva, P.S.; Pinheiro, K.C.; L.C.; Sousa Junior, E.C.                                                                                                                                                                                                                                                                                                                                                                                                                                          |
| EPI_ISL_1165565                                                                                                                                                                                            | Dutch COVID-19 response team                                                                                                         | National Institute for Public Health and the Environment (RIVM)                                                            | Adam Meijer, Harry Vennema, Dirk Eggink, Jeroen Cremer, Sharon van den Brink, Bas van der Veer, AnneMarie van den Brandt, Florian Zwagemaker, Dennis Schmitz, Chantal Reusken, on behalf of the national COVID-19 response team                                                                                                                                                                                                                                                                                                                                                                |
| EPI_ISL_1166149, EPI_ISL_1166151, EPI_ISL_1166156, EPI_ISL_1166157, EPI_ISL_1166160, EPI_ISL_1166163, EPI_ISL_1166164, EPI_ISL_1166165, EPI_ISL_1166167, EPI_ISL_1166168, EPI_ISL_1166170, EPI_ISL_1166171 | see above                                                                                                                            | Università degli Studi di Perugia                                                                                          | Mencacci A, Camilloni B, Lorusso A, Marcacci M, Di Domenico M, Ancora M, Curini V, Mangone I, Rinaldi A, Scialabba S, Di Pasquale A, Cammà C, Puglia I, Calistri P, Savini G                                                                                                                                                                                                                                                                                                                                                                                                                   |
| EPI_ISL_1166615                                                                                                                                                                                            | LACEN - Laboratório Central de Saúde Pública do Rio Grande do Norte                                                                  | Evandro Chagas Institute Virology                                                                                          | Santos, M.C.; Silva, A.M.; Junior, W.D.C.; Barbagelata, L.S.; Ferreira, J.A.; Sousa, E.M.A.; da Silva, P.S.; Pinheiro, K.C.; L.C.; Sousa Junior, E.C.                                                                                                                                                                                                                                                                                                                                                                                                                                          |
| EPI_ISL_1166788                                                                                                                                                                                            | University Hospitals of Geneva, Laboratory of Virology                                                                               | HUG, Laboratory of Virology and the Health2030 Genome Center                                                               | Samuel Cordey, Ana Rita Goncalves, Laurent Kaiser, Lorenzo Cerutti, Henri Pegeot, Melyssa Elies, Deborah Penet, Keith Harshman, Ioannis Xenarios, Emmanouil Dermitzakis                                                                                                                                                                                                                                                                                                                                                                                                                        |
| EPI_ISL_1169456                                                                                                                                                                                            | ASL Napoli 1 Centro                                                                                                                  | AMES Centro Polidiagnostico Strumentale S.r.l.                                                                             | "Giovanni Savarese, Raffaella Ruggiero, Eloisa Evangelista, Antonella Di Carlo, Luisa Circelli, Luigi D'Amore, Nadia Petrillo, Monica Ianniello, Roberto Sirica, Maurizio D'Amora, Antonio Fico"                                                                                                                                                                                                                                                                                                                                                                                               |
| EPI_ISL_1169498                                                                                                                                                                                            | OR State PHL-Virology/Immunology Section                                                                                             | Genomics and Discovery, Respiratory Viruses Branch, Division of Viral Diseases, Centers for Disease Control and Prevention | Krista Queen, Yan Li, Ying Tao, Jing Zhang, Anna Uehara, Anna Montmayer, Clinton R. Paden, Peter W. Cook, Rachel Marine, Mili Sheth, Jasmine Padilla, Sarah Nobles, Mark Burroughs, Lori Rowe, Haibin Wang, Ben L. Rambo-Martin, Dhvani Batra, Justin Lee, Suxiang Tong                                                                                                                                                                                                                                                                                                                        |
| EPI_ISL_1169908, EPI_ISL_1169909, EPI_ISL_1169910                                                                                                                                                          | UOC Microbiologia e Virologia, Azienda Ospedaliera Universitaria Senese, Siena, Italy                                                | Dipartimento di Biotecnologie Mediche                                                                                      | Maria Grazia Cusi, David Pinzauti, Claudia Gandolfo, Gabriele Anichini, Gianni Pozzi, Gianni Gori Savellini, Francesco Santoro                                                                                                                                                                                                                                                                                                                                                                                                                                                                 |
| EPI_ISL_1171549                                                                                                                                                                                            | SYNLAB                                                                                                                               | GIGA Medical Genomics                                                                                                      | Keith Durkin, Maria Artesi, Sébastien Bontems, Raphaël Boreux, Bouchra Boujemla, Nathalie Renotte, Cécile Meex, Pierrette Melin, Marie-Pierre Hayette, Vincent Bours                                                                                                                                                                                                                                                                                                                                                                                                                           |
| EPI_ISL_1171570, EPI_ISL_1171571, EPI_ISL_1171584                                                                                                                                                          | I.F.A.C. Hopital Princesse Paola                                                                                                     | GIGA Medical Genomics                                                                                                      | Keith Durkin, Maria Artesi, Sébastien Bontems, Raphaël Boreux, Bouchra Boujemla, Nathalie Renotte, Cécile Meex, Pierrette Melin, Marie-Pierre Hayette, Vincent Bours                                                                                                                                                                                                                                                                                                                                                                                                                           |
| EPI_ISL_1171592                                                                                                                                                                                            | SYNLAB                                                                                                                               | GIGA Medical Genomics                                                                                                      | Keith Durkin, Maria Artesi, Sébastien Bontems, Raphaël Boreux, Bouchra Boujemla, Nathalie Renotte, Cécile Meex, Pierrette Melin, Marie-Pierre Hayette, Vincent Bours                                                                                                                                                                                                                                                                                                                                                                                                                           |
| EPI_ISL_1171619                                                                                                                                                                                            | IAL Regional de Presidente Prudente                                                                                                  | Instituto Adolfo Lutz, Interdisciplinary Procedures Center, Strategic Laboratory                                           | Claudio Tavares Sacchi, Claudia Regina Gonçalves, Erica Valessa Ramos Gomes, Karoline Rodrigues Campos                                                                                                                                                                                                                                                                                                                                                                                                                                                                                         |
| EPI_ISL_1171648, EPI_ISL_1171649, EPI_ISL_1171650                                                                                                                                                          | Centro de Saude Dr. Jose Paione em Mococa                                                                                            | Instituto Adolfo Lutz, Interdisciplinary Procedures Center, Strategic Laboratory                                           | Claudio Tavares Sacchi, Claudia Regina Gonçalves, Erica Valessa Ramos Gomes, Karoline Rodrigues Campos, Caio Vinicius Dias Lopes                                                                                                                                                                                                                                                                                                                                                                                                                                                               |
| EPI_ISL_1171653, EPI_ISL_1171656, EPI_ISL_1171657, EPI_ISL_1171658, EPI_ISL_1171666, EPI_ISL_1171672, EPI_ISL_1171674                                                                                      | IAL Regional de Presidente Prudente                                                                                                  | Instituto Adolfo Lutz, Interdisciplinary Procedures Center, Strategic Laboratory                                           | Claudio Tavares Sacchi, Claudia Regina Gonçalves, Erica Valessa Ramos Gomes, Karoline Rodrigues Campos, Caio Vinicius Dias Lopes                                                                                                                                                                                                                                                                                                                                                                                                                                                               |
| EPI_ISL_1171967                                                                                                                                                                                            | Instituto Nacional de Saude (INSA)                                                                                                   | Instituto Nacional de Saude (INSA)                                                                                         | Borges et al                                                                                                                                                                                                                                                                                                                                                                                                                                                                                                                                                                                   |
| EPI_ISL_1176304                                                                                                                                                                                            | AZ Klina                                                                                                                             | AZ Klina                                                                                                                   | Dr. C. Vael                                                                                                                                                                                                                                                                                                                                                                                                                                                                                                                                                                                    |
| EPI_ISL_1178582                                                                                                                                                                                            | Department of Infectious Diseases, Istituto Superiore di Sanità, Rome, Italy; Università degli Studi di Perugia, Perugia, Italy      | Istituto Superiore di Sanità (ISS)                                                                                         | Paola Stefanelli, Alessandra Lo Presti, Angela Di Martino, Stefano Fiore, Antonella Mencacci, Barbara Camilloni, Manuela Marra, Maria Carollo, Marco Crescenzi                                                                                                                                                                                                                                                                                                                                                                                                                                 |
| EPI_ISL_1180388                                                                                                                                                                                            | National Virus Reference Laboratory                                                                                                  | National Virus Reference Laboratory                                                                                        | Zoe Yandle, Charlene Bennett, Gabriel Gonzalez, Michael Carr, Jonathan Dean, Cillian F De Gascun                                                                                                                                                                                                                                                                                                                                                                                                                                                                                               |
| EPI_ISL_1181352                                                                                                                                                                                            | Department of Infectious Diseases, Istituto Superiore di Sanità, Rome, Italy; Azienda Ospedaliera Santa Maria di Terni, Terni, Italy | Istituto Superiore di Sanità (ISS)                                                                                         | Paola Stefanelli, Angela Di Martino, Alessandra Lo Presti, Stefano Fiore, Augusto Scaccetti, Michele Palumbo, Cinzia Di Giuli, Manuela Marra, Maria Carollo, Marco Crescenzi                                                                                                                                                                                                                                                                                                                                                                                                                   |
| EPI_ISL_1182543, EPI_ISL_1182544, EPI_ISL_1182545                                                                                                                                                          | Fundação Ezequiel Dias (FUNED)                                                                                                       | Coordenação Geral de Laboratórios de Saúde Pública (CGLAB/DAEVS/SVS/MS)                                                    | Vagner Fonseca, et al.                                                                                                                                                                                                                                                                                                                                                                                                                                                                                                                                                                         |
| EPI_ISL_1182734, EPI_ISL_1182768, EPI_ISL_1182769                                                                                                                                                          | Alaska State Virology Laboratory                                                                                                     | Alaska State Virology Laboratory                                                                                           | Stephanie DeRonde, Lisa Smith, Ph.D., Jack Chen, Ph.D.                                                                                                                                                                                                                                                                                                                                                                                                                                                                                                                                         |
| EPI_ISL_1184825                                                                                                                                                                                            | National Institute of Infectious Diseases-Prof. Dr. Matei Bals Molecular Diagnostics Laboratory                                      | National Institute of Infectious Diseases-Prof. Dr. Matei Bals Molecular Diagnostics Laboratory                            | Leontina Banica, Marius Surleac, Corina Casanguiu, Petre Milu, Andreea Tudor, Simona Paraschiv, Dan Otelea                                                                                                                                                                                                                                                                                                                                                                                                                                                                                     |
| EPI_ISL_1187189                                                                                                                                                                                            | Lighthouse Lab in Cambridge                                                                                                          | Wellcome Sanger Institute for the COVID-19 Genomics UK (COG-UK) Consortium                                                 | Rob Howes, The Lighthouse Lab in Cambridge and Alex Alderton, Roberto Amato, Jeffrey Barrett, Sonia Goncalves, Ewan Harrison, David K. Jackson, Ian Johnston, Dominic Kwiatkowski, Cordelia Langford, John Sillitoe on behalf of the Wellcome Sanger Institute COVID-19 Surveillance Team                                                                                                                                                                                                                                                                                                      |
| EPI_ISL_1194849, EPI_ISL_1194852                                                                                                                                                                           | Helix/Illumina                                                                                                                       | Centers for Disease Control and Prevention Division of Viral Diseases, Pathogen Discovery                                  | Peter W. Cook, Dakota Howard, Dhvani Batra, Ben L. Rambo-Martin, Eileen de Feo, Jan Antico, Christine Tran, Matthew Tolentino, Shannon Wickline, Kim Gietzen, Brad Sickler, Jingtao Liu, Eric Allen, Phil Febbo, Summer Galloway, Nicole L. Washington, Simon White, Geraint Levan, Kelly Schiabor Barrett, Elizabeth Cirulli, Alexandre Bolze, Ary Ascencio, Charlotte Rivera-Garcia, Ryan Cho, Jason Nguyen, Sherry Wang, Jimmy Ramirez, Tyler Cassens, Efen Sandoval, Magnus Isaksson, William Lee, David Becker, Marc Laurent, James Lu, Clinton R. Paden, Suxiang Tong, Duncan MacCannell |
| EPI_ISL_1195954                                                                                                                                                                                            | Ospedale "F. Spaziani" Frosinone                                                                                                     | INMI Lazzaro Spallanzani IRCCS                                                                                             | CEM Gruber, B Bartolini, E Giombini, F Messina, M Rueca, O Butera, R Puleselli, G Brocco, C Gargiulo, MR Capobianchi, A Di Caro                                                                                                                                                                                                                                                                                                                                                                                                                                                                |
| EPI_ISL_1195963                                                                                                                                                                                            | Microbiology and Virology Unit, Florence Careggi University Hospital                                                                 | Microbiology and Virology Unit, Florence Careggi University Hospital                                                       | Vincenzo Di Pilato, Marco Coppi, Fabio Morecchiato, Noemi Aiezza, Ilaria Baccani, Nicla Giovacchini, Alberto Antonelli, Emanuele Gori, Gian Maria Rossolini                                                                                                                                                                                                                                                                                                                                                                                                                                    |
| EPI_ISL_1196296                                                                                                                                                                                            | Centro de Saude II Dr. Jose Paione Mococa                                                                                            | Instituto Adolfo Lutz, Interdisciplinary Procedures Center, Strategic Laboratory                                           | Claudio Tavares Sacchi, Claudia Regina Gonçalves, Erica Valessa Ramos Gomes, Karoline Rodrigues Campos, Caio Vinicius Dias Lopes                                                                                                                                                                                                                                                                                                                                                                                                                                                               |
| EPI_ISL_1196299                                                                                                                                                                                            | IAL Regional de Marilia                                                                                                              | Instituto Adolfo Lutz, Interdisciplinary Procedures Center,                                                                | Claudio Tavares Sacchi, Claudia Regina Gonçalves, Erica Valessa Ramos Gomes, Karoline Rodrigues Campos, Caio Vinicius Dias Lopes                                                                                                                                                                                                                                                                                                                                                                                                                                                               |

|                                                                                                                                                         |                                                                                                                                      | Strategic Laboratory                                                             |                                                                                                                                                                                                                                                                                                                                                                                                                                                                                                                                                                          |
|---------------------------------------------------------------------------------------------------------------------------------------------------------|--------------------------------------------------------------------------------------------------------------------------------------|----------------------------------------------------------------------------------|--------------------------------------------------------------------------------------------------------------------------------------------------------------------------------------------------------------------------------------------------------------------------------------------------------------------------------------------------------------------------------------------------------------------------------------------------------------------------------------------------------------------------------------------------------------------------|
| EPI_ISL_1196991, EPI_ISL_1197001, EPI_ISL_1197002, EPI_ISL_1197005                                                                                      | IZSM                                                                                                                                 | TIGEM                                                                            | Antonio Grimaldi Patrizia Annunziata Francesco Panariello Biancamaria Pierri Valentina Bouche Chiara Colantuono Maria Concetta Cuomo Denise Di Concilio Lucio Di Filippo Anna Manfredi Marcello Salvi Antonio Limone Pellegrino Cerino Andrea Ballabio Davide Cacchiarelli                                                                                                                                                                                                                                                                                               |
| EPI_ISL_1198007                                                                                                                                         | Department of Infectious Diseases, Istituto Superiore di Sanità, Rome, Italy; Azienda Ospedaliera Santa Maria di Terni, Terni, Italy | Istituto Superiore di Sanità (ISS)                                               | Paola Stefanelli, Angela Di Martino, Alessandra Lo Presti, Stefano Fiore, Augusto Scaccetti, Michele Palumbo, Cinzia Di Giulii, Manuela Marra, Maria Carollo, Marco Crescenzi                                                                                                                                                                                                                                                                                                                                                                                            |
| EPI_ISL_1198303, EPI_ISL_1199970, EPI_ISL_1200011, EPI_ISL_1200012, EPI_ISL_1200015                                                                     | Swedish national genomic surveillance program of SARS-CoV-2                                                                          | The Public Health Agency of Sweden                                               | Swedish national genomic surveillance program of SARS-CoV-2                                                                                                                                                                                                                                                                                                                                                                                                                                                                                                              |
| EPI_ISL_1200515, EPI_ISL_1200517                                                                                                                        | Department of Infectious Diseases, Istituto Superiore di Sanità, Rome, Italy; Università degli Studi di Perugia, Perugia, Italy      | Istituto Superiore di Sanità (ISS)                                               | Paola Stefanelli, Alessandra Lo Presti, Angela Di Martino, Stefano Fiore, Antonella Mencacci, Barbara Camilloni, Manuela Marra, Maria Carollo, Marco Crescenzi                                                                                                                                                                                                                                                                                                                                                                                                           |
| EPI_ISL_1200661                                                                                                                                         | BIOMNIS LYON                                                                                                                         | CNR Virus des Infections Respiratoires - France SUD                              | Antonin Bal, Gregory Destras, Gwendolynne Burfin, Hadrien Regue, Quentin Semanas, Martine Valette, Bruno Lina, Laurence Josset                                                                                                                                                                                                                                                                                                                                                                                                                                           |
| EPI_ISL_1201884                                                                                                                                         | Aeroporto Internacional de Guarulhos                                                                                                 | Instituto Adolfo Lutz, Interdisciplinary Procedures Center, Strategic Laboratory | Claudio Tavares Sacchi, Claudia Regina Gonçalves, Erica Valessa Ramos Gomes, Karoline Rodrigues Campos, Caio Vinicius Dias Lopes                                                                                                                                                                                                                                                                                                                                                                                                                                         |
| EPI_ISL_1201893                                                                                                                                         | IAL Regional de Sorocaba                                                                                                             | Instituto Adolfo Lutz, Interdisciplinary Procedures Center, Strategic Laboratory | Claudio Tavares Sacchi, Claudia Regina Gonçalves, Erica Valessa Ramos Gomes, Karoline Rodrigues Campos, Caio Vinicius Dias Lopes                                                                                                                                                                                                                                                                                                                                                                                                                                         |
| EPI_ISL_1207532                                                                                                                                         | Lighthouse Lab in Milton Keynes                                                                                                      | Wellcome Sanger Institute for the COVID-19 Genomics UK (COG-UK) Consortium       | The Lighthouse Lab in Milton Keynes and Alex Alderton, Roberto Amato, Jeffrey Barrett, Sonia Goncalves, Ewan Harrison, David K. Jackson, Ian Johnston, Dominic Kwiatkowski, Cordelia Langford, John Sillitoe on behalf of the Wellcome Sanger Institute COVID-19 Surveillance Team                                                                                                                                                                                                                                                                                       |
| EPI_ISL_1208676                                                                                                                                         | Microbiology Department, Laboratori Clinica Metropolitana Nord. Hospital Universitari Germans Trias i Pujol.                         | Can Ruti SARS-CoV-2 Sequencing Hub (HUGTIP/IRSI/CAIXA/IGTP)                      | Marc Noguera-Julian, Pilar Armengol, Ignacio Blanco, Antoni E Bordoy, Francesc Catala-Moll, Pere-Joan Cardona, Julia G Prado, Carol Galvez Maria Casadellà, Cristina Casañ, Gemma Clara, Irina Pey, Jordi Barretina, Bonaventura Clotet, Cristina Esteban, Montserrat Giménez, Mercedes Guerrero, Anna Not, Roger Paredes, Mariona Parera, Verónica Saludes, Alba Sánchez, and Elisa Marró on behalf of the Can Ruti SARS-CoV-2 Sequencing Hub.                                                                                                                          |
| EPI_ISL_1209089, EPI_ISL_1209127                                                                                                                        | UW Virology Lab                                                                                                                      | UW Virology Lab                                                                  | Pavitra Roychoudhury, Hong Xie, Lasata Shrestha, Shah Mohamed Bakhsh, Michelle Lin, Noah Baker, Sean Ellis, Saraswathi Sathees, Meei-Li Huang, Keith R Jerome, Alexander Greninger                                                                                                                                                                                                                                                                                                                                                                                       |
| EPI_ISL_1212659, EPI_ISL_1212661, EPI_ISL_1212664, EPI_ISL_1212666, EPI_ISL_1212668, EPI_ISL_1212670                                                    | Università degli Studi di Perugia                                                                                                    | Istituto Zooprofilattico Sperimentale dell'Abruzzo e Molise "G. Caporale"        | Mencacci A., Camilloni B., Lorusso A, Marcacci M, Di Domenico M, Ancora M, Curini V, Mangone I, Rinaldi A, Scialabba S, Di Pasquale A, Cammà C, Puglia I, Calistri P, Savini G                                                                                                                                                                                                                                                                                                                                                                                           |
| EPI_ISL_1213168, EPI_ISL_1213170                                                                                                                        | LAFEM/UESC                                                                                                                           | Bioinformatics Laboratory / LNCC                                                 | Alessandra P Lamarca, Luiz G P de Almeida, Ronaldo da Silva Francisco Jr, Lucymara Fassarella Agnez Lima, Kátia Castanho Scortecci, Vinicius Pietta Perez, Otavio J. Brustolini, Eduardo Sérgio Soares Sousa, Danielle Angst Secco, Angela Maria Guimarães Santos, George Rego Albuquerque, Ana Paula Melo Mariano, Bianca Mendes Maciel, Alexandra L Gerber, Ana Paula de C Guimarães, Paulo Ricardo Nascimento, Francisco Paulo Freire Neto, Sandra Rocha Gadelha, Luis Cristóvão Porto, Eloiza Helena Campana, Selma Maria Bezerra Jeronimo, Ana Tereza R Vasconcelos |
| EPI_ISL_1213171                                                                                                                                         | Laboratório HLA/UERJ                                                                                                                 | Bioinformatics Laboratory / LNCC                                                 | Alessandra P Lamarca, Luiz G P de Almeida, Ronaldo da Silva Francisco Jr, Lucymara Fassarella Agnez Lima, Kátia Castanho Scortecci, Vinicius Pietta Perez, Otavio J. Brustolini, Eduardo Sérgio Soares Sousa, Danielle Angst Secco, Angela Maria Guimarães Santos, George Rego Albuquerque, Ana Paula Melo Mariano, Bianca Mendes Maciel, Alexandra L Gerber, Ana Paula de C Guimarães, Paulo Ricardo Nascimento, Francisco Paulo Freire Neto, Sandra Rocha Gadelha, Luis Cristóvão Porto, Eloiza Helena Campana, Selma Maria Bezerra Jeronimo, Ana Tereza R Vasconcelos |
| EPI_ISL_1213173, EPI_ISL_1213175, EPI_ISL_1213177, EPI_ISL_1213178, EPI_ISL_1213180, EPI_ISL_1213182, EPI_ISL_1213183, EPI_ISL_1213185, EPI_ISL_1213187 | IMT-UFRN/RN                                                                                                                          | Bioinformatics Laboratory / LNCC                                                 | Alessandra P Lamarca, Luiz G P de Almeida, Ronaldo da Silva Francisco Jr, Lucymara Fassarella Agnez Lima, Kátia Castanho Scortecci, Vinicius Pietta Perez, Otavio J. Brustolini, Eduardo Sérgio Soares Sousa, Danielle Angst Secco, Angela Maria Guimarães Santos, George Rego Albuquerque, Ana Paula Melo Mariano, Bianca Mendes Maciel, Alexandra L Gerber, Ana Paula de C Guimarães, Paulo Ricardo Nascimento, Francisco Paulo Freire Neto, Sandra Rocha Gadelha, Luis Cristóvão Porto, Eloiza Helena Campana, Selma Maria Bezerra Jeronimo, Ana Tereza R Vasconcelos |
| EPI_ISL_1213189, EPI_ISL_1213190                                                                                                                        | LBM/UFPB                                                                                                                             | Bioinformatics Laboratory / LNCC                                                 | Alessandra P Lamarca, Luiz G P de Almeida, Ronaldo da Silva Francisco Jr, Lucymara Fassarella Agnez Lima, Kátia Castanho Scortecci, Vinicius Pietta Perez, Otavio J. Brustolini, Eduardo Sérgio Soares Sousa, Danielle Angst Secco, Angela Maria Guimarães Santos, George Rego Albuquerque, Ana Paula Melo Mariano, Bianca Mendes Maciel, Alexandra L Gerber, Ana Paula de C Guimarães, Paulo Ricardo Nascimento, Francisco Paulo Freire Neto, Sandra Rocha Gadelha, Luis Cristóvão Porto, Eloiza Helena Campana, Selma Maria Bezerra Jeronimo, Ana Tereza R Vasconcelos |
| EPI_ISL_1213192, EPI_ISL_1213194, EPI_ISL_1213196, EPI_ISL_1213197, EPI_ISL_1213199                                                                     | IMT-UFRN/RN                                                                                                                          | Bioinformatics Laboratory / LNCC                                                 | Alessandra P Lamarca, Luiz G P de Almeida, Ronaldo da Silva Francisco Jr, Lucymara Fassarella Agnez Lima, Kátia Castanho Scortecci, Vinicius Pietta Perez, Otavio J. Brustolini, Eduardo Sérgio Soares Sousa, Danielle Angst Secco, Angela Maria Guimarães Santos, George Rego Albuquerque, Ana Paula Melo Mariano, Bianca Mendes Maciel, Alexandra L Gerber, Ana Paula de C Guimarães, Paulo Ricardo Nascimento, Francisco Paulo Freire Neto, Sandra Rocha Gadelha, Luis Cristóvão Porto, Eloiza Helena Campana, Selma Maria Bezerra Jeronimo, Ana Tereza R Vasconcelos |
| EPI_ISL_1213201, EPI_ISL_1213202, EPI_ISL_1213204, EPI_ISL_1213206, EPI_ISL_1213207                                                                     | LBM/UFPB                                                                                                                             | Bioinformatics Laboratory / LNCC                                                 | Alessandra P Lamarca, Luiz G P de Almeida, Ronaldo da Silva Francisco Jr, Lucymara Fassarella Agnez Lima, Kátia Castanho Scortecci, Vinicius Pietta Perez, Otavio J. Brustolini, Eduardo Sérgio Soares Sousa, Danielle Angst Secco, Angela Maria Guimarães Santos, George Rego Albuquerque, Ana Paula Melo Mariano, Bianca Mendes Maciel, Alexandra L Gerber, Ana Paula de C Guimarães, Paulo Ricardo Nascimento, Francisco Paulo Freire Neto, Sandra Rocha Gadelha, Luis Cristóvão Porto, Eloiza Helena Campana, Selma Maria Bezerra Jeronimo, Ana Tereza R Vasconcelos |
| EPI_ISL_1214989, EPI_ISL_1215072                                                                                                                        | SYNLAB MVZ Weiden                                                                                                                    | Robert Koch Institute                                                            | unknown                                                                                                                                                                                                                                                                                                                                                                                                                                                                                                                                                                  |
| EPI_ISL_1215088, EPI_ISL_1215122, EPI_ISL_1215136                                                                                                       | Synlab MVZ Augsburg                                                                                                                  | Robert Koch Institute                                                            | unknown                                                                                                                                                                                                                                                                                                                                                                                                                                                                                                                                                                  |
| EPI_ISL_1215159, EPI_ISL_1215215                                                                                                                        | SYNLAB MVZ Weiden                                                                                                                    | Robert Koch Institute                                                            | unknown                                                                                                                                                                                                                                                                                                                                                                                                                                                                                                                                                                  |
| EPI_ISL_1217110                                                                                                                                         | Labor Dr. Wisplinghoff - Köln                                                                                                        | Robert Koch Institute                                                            | unknown                                                                                                                                                                                                                                                                                                                                                                                                                                                                                                                                                                  |
| EPI_ISL_1217383                                                                                                                                         | Laboratorio Genzano - ASL RM 10                                                                                                      | INMI Lazzaro Spallanzani IRCCS                                                   | CEM Gruber, B Bartolini, E Giombini, F Messina, M Rueca, O Butera, G Tramini, E Conti, MR Capobianchi, A Di Caro                                                                                                                                                                                                                                                                                                                                                                                                                                                         |
| EPI_ISL_1217386                                                                                                                                         | Ospedale "F. Spaziani" Frosinone                                                                                                     | INMI Lazzaro Spallanzani IRCCS                                                   | M Rueca, O Butera, CEM Gruber, B Bartolini, E Giombini, F Messina, R Pulselli, C Sias, G Brocco, A Di Caro, MR Capobianchi                                                                                                                                                                                                                                                                                                                                                                                                                                               |
| EPI_ISL_1218902, EPI_ISL_1218939                                                                                                                        | Florida Bureau of Public Health Laboratories                                                                                         | Florida Bureau of Public Health Laboratories                                     | Sarah Schmedes, Jason Ballant                                                                                                                                                                                                                                                                                                                                                                                                                                                                                                                                            |
| EPI_ISL_1219021                                                                                                                                         | Hospital Aviccena                                                                                                                    | Instituto Adolfo Lutz, Interdisciplinary Procedures Center, Strategic Laboratory | Claudio Tavares Sacchi, Claudia Regina Gonçalves, Erica Valessa Ramos Gomes, Karoline Rodrigues Campos, Caio Vinicius Dias Lopes                                                                                                                                                                                                                                                                                                                                                                                                                                         |
| EPI_ISL_1219025                                                                                                                                         | IAL Regional de Sorocaba                                                                                                             | Instituto Adolfo Lutz, Interdisciplinary Procedures Center, Strategic Laboratory | Claudio Tavares Sacchi, Claudia Regina Gonçalves, Erica Valessa Ramos Gomes, Karoline Rodrigues Campos, Caio Vinicius Dias Lopes                                                                                                                                                                                                                                                                                                                                                                                                                                         |
| EPI_ISL_1219029, EPI_ISL_1219030, EPI_ISL_1219033, EPI_ISL_1219036                                                                                      | Aeroporto Internacional de Guarulhos                                                                                                 | Instituto Adolfo Lutz, Interdisciplinary Procedures Center, Strategic Laboratory | Claudio Tavares Sacchi, Claudia Regina Gonçalves, Erica Valessa Ramos Gomes, Karoline Rodrigues Campos, Caio Vinicius Dias Lopes                                                                                                                                                                                                                                                                                                                                                                                                                                         |
| EPI_ISL_1219133                                                                                                                                         | Laboratorio Central de Saude Publica do Estado do Parana (LACEN-PR)                                                                  | Laboratory of Respiratory Viruses and Measles, Oswaldo Cruz Institute, FIOCRUZ   | Paola Resende, Luciana Appolinario, Fernando Motta, Anna Carolina Paixao, Ana Carolina Mendonca, Alice Sampaio Rocha, Renata Serrano Lopes, Maria do Carmo Debur, Inina Nastassja Riediger, Marilda Siqueira on behalf of the Fiocruz COVID-19 Genomic Surveillance Network                                                                                                                                                                                                                                                                                              |
| EPI_ISL_1219134, EPI_ISL_1219135                                                                                                                        | Laboratorio Central de Saude Publica do Estado do Alagoas (LACEN-AL)                                                                 | Laboratory of Respiratory Viruses and Measles, Oswaldo Cruz Institute, FIOCRUZ   | Paola Resende, Luciana Appolinario, Fernando Motta, Anna Carolina Paixao, Ana Carolina Mendonca, Alice Sampaio Rocha, Renata Serrano Lopes, Anderson Brandao Leite, Marilda Siqueira on behalf of the Fiocruz COVID-19 Genomic Surveillance Network                                                                                                                                                                                                                                                                                                                      |
| EPI_ISL_1219136                                                                                                                                         | Gonçalo Moniz Institute, FIOCRUZ, Bahia                                                                                              | Laboratory of Respiratory Viruses and Measles, Oswaldo Cruz Institute, FIOCRUZ   | Paola Resende, Luciana Appolinario, Fernando Motta, Anna Carolina Paixao, Ana Carolina Mendonca, Alice Sampaio Rocha, Renata Serrano Lopes, Tiago Graf, Ricardo Khouri, Marilda Siqueira on behalf of the Fiocruz COVID-19 Genomic Surveillance Network                                                                                                                                                                                                                                                                                                                  |
| EPI_ISL_1220088, EPI_ISL_1220089,                                                                                                                       | Plateforme de testing Namuroise                                                                                                      | Plateforme de testing Namuroise                                                  | ; Otto Gaetan ; Denis Olivier ; Degosserie Jonathan ; Mullier François                                                                                                                                                                                                                                                                                                                                                                                                                                                                                                   |

|                                                   |                                                                                                 |                                                                                                                                    |                                                                                                                                                                                                                                                                                                                                                                                                                                                                                                                                                                                                                                                           |                                                                                                               |
|---------------------------------------------------|-------------------------------------------------------------------------------------------------|------------------------------------------------------------------------------------------------------------------------------------|-----------------------------------------------------------------------------------------------------------------------------------------------------------------------------------------------------------------------------------------------------------------------------------------------------------------------------------------------------------------------------------------------------------------------------------------------------------------------------------------------------------------------------------------------------------------------------------------------------------------------------------------------------------|---------------------------------------------------------------------------------------------------------------|
| EPI_ISL_1220090, EPI_ISL_1220091, EPI_ISL_1220092 |                                                                                                 |                                                                                                                                    |                                                                                                                                                                                                                                                                                                                                                                                                                                                                                                                                                                                                                                                           |                                                                                                               |
| EPI_ISL_1222737                                   | AZDelta                                                                                         | AZDelta                                                                                                                            |                                                                                                                                                                                                                                                                                                                                                                                                                                                                                                                                                                                                                                                           | Geert Martens; Dieter De Smet                                                                                 |
| EPI_ISL_1229132                                   | Ospedale San Camillo De Lellis di Rieti                                                         | INMI Lazzaro Spallanzani IRCCS                                                                                                     | E Giombini, F Messina, M Rueca, O Butera, CEM Gruber, B Bartolini, S Venarubea, A De Luca, L Casertano, A Di Caro, MR Capobianchi                                                                                                                                                                                                                                                                                                                                                                                                                                                                                                                         |                                                                                                               |
| EPI_ISL_1229136                                   | Ospedale "F. Spaziani" Frosinone                                                                | INMI Lazzaro Spallanzani IRCCS                                                                                                     | F Messina, M Rueca, O Butera, CEM Gruber, B Bartolini, E Giombini, R Pulselli, C Sias, G Brocco, MR Capobianchi, A Di Caro                                                                                                                                                                                                                                                                                                                                                                                                                                                                                                                                |                                                                                                               |
| EPI_ISL_1229141                                   | Ospedale "F. Spaziani" Frosinone                                                                | INMI Lazzaro Spallanzani IRCCS                                                                                                     | F Messina, M Rueca, O Butera, CEM Gruber, B Bartolini, E Giombini, R Pulselli, C Gargiulo, C Sias, MR Capobianchi, A Di Caro                                                                                                                                                                                                                                                                                                                                                                                                                                                                                                                              |                                                                                                               |
| EPI_ISL_1237447, EPI_ISL_1238196                  | Houston Methodist Hospital                                                                      | Houston Methodist Hospital                                                                                                         | S. Wesley Long, Randall J. Olsen, Paul A. Christensen, Sishir Subedi, Robert Olson, James J. Davis, Matthew Ojeda Saavedra, Prasanti Yerramilli, Layne Pruitt, Kristina Reppond, Madison N. Shyer, Jessica Cambric, Ilya J. Finkelstein, Jimmy Gollihar, and James M. Musser                                                                                                                                                                                                                                                                                                                                                                              |                                                                                                               |
| EPI_ISL_1239012                                   | Laboratório Central de Saúde Pública do Estado de Pernambuco (LACEN-PE)                         | WallauLab, Aggeu Magalhaes Institute                                                                                               | Marcelo Henrique dos Santos Paiva, Duschinka Ribeiro Duarte Guedes, Cássia Docena, Matheus Filgueira Bezerra, Filipe Zimmer Dezordi, Lais Ceschini Machado, Larissa Krokovsky, Elisama Helvecio, Alexandre Freitas da Silva, Antonio Mauro Rezende, Sival Pinto Brandão Filho, Constandina Flávia Junqueira Ayres, Gabriel Luz Wallau on behalf of the FioCruz COVID-19 Genomic Surveillance Network                                                                                                                                                                                                                                                      |                                                                                                               |
| EPI_ISL_1239111                                   | Laboratório Central de Saúde Pública Noel Nutels                                                | Coordenação Geral de Laboratórios de Saúde Pública (CGLAB)                                                                         |                                                                                                                                                                                                                                                                                                                                                                                                                                                                                                                                                                                                                                                           | Vagner Fonseca et al,                                                                                         |
| EPI_ISL_1239119                                   | Laboratório Central de Saúde Pública do Espírito Santo                                          | Coordenação Geral de Laboratórios de Saúde Pública (CGLAB)                                                                         |                                                                                                                                                                                                                                                                                                                                                                                                                                                                                                                                                                                                                                                           | Vagner Fonseca et al,                                                                                         |
| EPI_ISL_1239137, EPI_ISL_1239138                  | Fundação Ezequiel Dias                                                                          | Coordenação Geral de Laboratórios de Saúde Pública (CGLAB)                                                                         |                                                                                                                                                                                                                                                                                                                                                                                                                                                                                                                                                                                                                                                           | Vagner Fonseca et al,                                                                                         |
| EPI_ISL_1239974                                   | Florida Bureau of Public Health Laboratories                                                    | Florida Bureau of Public Health Laboratories                                                                                       |                                                                                                                                                                                                                                                                                                                                                                                                                                                                                                                                                                                                                                                           | Sarah Schmedes, Jason Blanton                                                                                 |
| EPI_ISL_1240606                                   | National Laboratory for Health, Environment and Food, OMM, Maribor                              | CISLD (Clinical Institute of Special Laboratory Diagnostics), University Children's Hospital, University Medical Center Ljubljana  | Jernej Kova, Barbara Jenko Bizjan, Tine Tesovnik, Robert Šket, Katarina Kozmos, Ana Grom, Maruša Debeljak, Marko Pokorn, Tadej Battelino                                                                                                                                                                                                                                                                                                                                                                                                                                                                                                                  |                                                                                                               |
| EPI_ISL_1241789, EPI_ISL_1241802                  | SYNLAB                                                                                          | GIGA Medical Genomics                                                                                                              | Keith Durkin, Maria Artesi, Sébastien Bontems, Raphaël Boreux, Bouchra Boujemla, Nathalie Renotte, Cécile Meex, Pierrette Melin, Marie-Pierre Hayette, Vincent Bours                                                                                                                                                                                                                                                                                                                                                                                                                                                                                      |                                                                                                               |
| EPI_ISL_1250700                                   | LabPLUS                                                                                         | Institute of Environmental Science and Research (ESR)                                                                              | Rachel Boyle, SallyAnn Harbison, Olivia Stroeven, Xiaoyun Ren, Matt Storey, Nikki Freed, Muhammad Faisal, Jing Wang, Hermes Perez, Anja Werno, Antje van der Linden, Arlo Upton, Chris Mansell, David Hammer, Dragana Drinkovic, Gary McAuliffe, Hana Sofia Andersson, James Ussher, Jill Sherwood, Josh Freeman, Julia Howard, Juliet Elvy, Mary DeAlmeida, Matt Blakiston, Matthew Rogers, Max Bloomfield, Michael Addidle, Michelle Balm, Sally Roberts, Sarah Jefferies, Sharmine Mutaiyah, Susan Morpeth, Susan Taylor, Timothy Blackmore, Vani Sathyendran, Veronica Playle, Virginia Hope, Erasmus Smit, Lauren Jelly, Olin Silander, Joep de Ligt |                                                                                                               |
| EPI_ISL_1250798                                   | Hospital Universitari Vall d'Hebron - Vall d'Hebron Institut de Recerca                         | Hospital Universitari Vall d'Hebron - Vall d'Hebron Institut de Recerca                                                            | Cristina Andrés, Maria Piñana, Josep F Abril, Damir Garcia-Cehic, Ariadna Rando, Juliana Esperalba, Maria Gema Codina, Carla Castillo, Maria Carmen Martín, Tomás Pumarola, Josep Quer, Andrés Antón                                                                                                                                                                                                                                                                                                                                                                                                                                                      |                                                                                                               |
| EPI_ISL_1251002                                   | OSPEDALE SAN SALVATORE L'AQUILA UOC PNEUMOLOGIA                                                 | Istituto Zooprofilattico Sperimentale dell'Abruzzo e Molise "G. Caporale"                                                          | Lorusso A, Marcacci M, Di Domenico M, Ancora M, Curini V, Mangone I, Rinaldi A, Scialabba S, Di Pasquale A, Cammà C, Puglia I, Calistri P, Savini G                                                                                                                                                                                                                                                                                                                                                                                                                                                                                                       |                                                                                                               |
| EPI_ISL_1251005, EPI_ISL_1251006                  | OSPEDALE SAN SALVATORE                                                                          | Istituto Zooprofilattico Sperimentale dell'Abruzzo e Molise "G. Caporale"                                                          | Lorusso A, Marcacci M, Di Domenico M, Ancora M, Curini V, Mangone I, Rinaldi A, Scialabba S, Di Pasquale A, Cammà C, Puglia I, Calistri P, Savini G                                                                                                                                                                                                                                                                                                                                                                                                                                                                                                       |                                                                                                               |
| EPI_ISL_1255064                                   | Marche en Famenne                                                                               | Plateforme de testing Namuroise                                                                                                    |                                                                                                                                                                                                                                                                                                                                                                                                                                                                                                                                                                                                                                                           | ; Otto Gaetan ; Denis Olivier ; Degosserie Jonathan ; Mullier François                                        |
| EPI_ISL_1255085                                   | Plateforme de testing Namuroise                                                                 | Plateforme de testing Namuroise                                                                                                    |                                                                                                                                                                                                                                                                                                                                                                                                                                                                                                                                                                                                                                                           | ; Otto Gaetan ; Denis Olivier ; Degosserie Jonathan ; Mullier François                                        |
| EPI_ISL_1259194, EPI_ISL_1259195                  | Department of Virology, Istituto Zooprofilattico Sperimentale del Lazio e della Toscana (IZSLT) | Department of General Diagnostics; Department of Virology; Istituto Zooprofilattico Sperimentale del Lazio e della Toscana (IZSLT) | Patricia Alba, Giuseppe Manna, Elena L. Diaconu, Fabiola Feltrin, Raffaella Conti, Teresa Scicluna, Virginia Carfora, Antonella Cersini, Alessia Franco, Antonio Battisti.                                                                                                                                                                                                                                                                                                                                                                                                                                                                                |                                                                                                               |
| EPI_ISL_1259270                                   | Laboratoire Hospitalier Universitaire de Bruxelles (LHUB-ULB)                                   | UAntwerp, Laboratory of Medical Microbiology                                                                                       |                                                                                                                                                                                                                                                                                                                                                                                                                                                                                                                                                                                                                                                           | Basil Britto Xavier, Jasmine Coppens, Marie Le Mercier, Christine Lammens, Veerle Matheeußen, Herman Goossens |
| EPI_ISL_1259412                                   | Sant'Eugenio/CTO ASL Roma 2                                                                     | INMI Lazzaro Spallanzani IRCCS                                                                                                     | M Rueca, O Butera, CEM Gruber, B Bartolini, E Giombini, F Messina, F Santini, G Bonfiglio, F Bondanini, GC Cocciolillo, C Disegni, A Di Caro, MR Capobianchi                                                                                                                                                                                                                                                                                                                                                                                                                                                                                              |                                                                                                               |
| EPI_ISL_1260858, EPI_ISL_1260860                  | Instituto Nacional de Saude (INSA)                                                              | Instituto Nacional de Saude (INSA)                                                                                                 |                                                                                                                                                                                                                                                                                                                                                                                                                                                                                                                                                                                                                                                           | Borges et al                                                                                                  |
| EPI_ISL_1260963                                   | ULSS 04 Veneto Orientale                                                                        | Istituto Zooprofilattico Sperimentale delle Venezie                                                                                | Adelaide Milani, Alessia Schivo, Annalisa Salviato, Erika Giorgia Quaranta, Luca Tassoni, Ambra Pastori, Edoardo Giussani, Alice Fusaro, Isabella Monne, Calogero Terregino, Antonia Ricci                                                                                                                                                                                                                                                                                                                                                                                                                                                                |                                                                                                               |
| EPI_ISL_1260964                                   | Microbiologia e Virologia                                                                       | Istituto Zooprofilattico Sperimentale delle Venezie                                                                                | Adelaide Milani, Alessia Schivo, Annalisa Salviato, Erika Giorgia Quaranta, Luca Tassoni, Ambra Pastori, Edoardo Giussani, Alice Fusaro, Isabella Monne, Calogero Terregino, Antonia Ricci                                                                                                                                                                                                                                                                                                                                                                                                                                                                |                                                                                                               |
| EPI_ISL_1261683                                   | LACEN - Laboratório Central de Saúde Pública do Amazonas                                        | Evandro Chagas Institute                                                                                                           | Santos, M.C.; Silva, A.M.; Junior, W.D.C.; Barbagelata, L.S.; Ferreira, J.A.; Sousa, E.M.A.; da Silva, P.S.; Pinheiro, K.C.; L.C.; Sousa Junior, E.C.                                                                                                                                                                                                                                                                                                                                                                                                                                                                                                     |                                                                                                               |
| EPI_ISL_1261684                                   | LACEN - Laboratório Central de Saúde Pública do Ceará                                           | Evandro Chagas Institute                                                                                                           | Santos, M.C.; Silva, A.M.; Junior, W.D.C.; Barbagelata, L.S.; Ferreira, J.A.; Sousa, E.M.A.; da Silva, P.S.; Pinheiro, K.C.; L.C.; Sousa Junior, E.C.                                                                                                                                                                                                                                                                                                                                                                                                                                                                                                     |                                                                                                               |
| EPI_ISL_1261685                                   | LACEN - Laboratório Central de Saúde Pública do Amazonas                                        | Evandro Chagas Institute                                                                                                           | Santos, M.C.; Silva, A.M.; Junior, W.D.C.; Barbagelata, L.S.; Ferreira, J.A.; Sousa, E.M.A.; da Silva, P.S.; Pinheiro, K.C.; L.C.; Sousa Junior, E.C.                                                                                                                                                                                                                                                                                                                                                                                                                                                                                                     |                                                                                                               |
| EPI_ISL_1261686                                   | LACEN - Laboratório Central de Saúde Pública do Amapá                                           | Evandro Chagas Institute                                                                                                           | Santos, M.C.; Silva, A.M.; Junior, W.D.C.; Barbagelata, L.S.; Ferreira, J.A.; Sousa, E.M.A.; da Silva, P.S.; Pinheiro, K.C.; L.C.; Sousa Junior, E.C.                                                                                                                                                                                                                                                                                                                                                                                                                                                                                                     |                                                                                                               |
| EPI_ISL_1261687                                   | LACEN - Laboratório Central de Saúde Pública do Roraima                                         | Evandro Chagas Institute                                                                                                           | Santos, M.C.; Silva, A.M.; Junior, W.D.C.; Barbagelata, L.S.; Ferreira, J.A.; Sousa, E.M.A.; da Silva, P.S.; Pinheiro, K.C.; L.C.; Sousa Junior, E.C.                                                                                                                                                                                                                                                                                                                                                                                                                                                                                                     |                                                                                                               |
| EPI_ISL_1261688, EPI_ISL_1261689                  | LACEN - Laboratório Central de Saúde Pública do Amapá                                           | Evandro Chagas Institute                                                                                                           | Santos, M.C.; Silva, A.M.; Junior, W.D.C.; Barbagelata, L.S.; Ferreira, J.A.; Sousa, E.M.A.; da Silva, P.S.; Pinheiro, K.C.; L.C.; Sousa Junior, E.C.                                                                                                                                                                                                                                                                                                                                                                                                                                                                                                     |                                                                                                               |
| EPI_ISL_1261690                                   | LACEN - Laboratório Central de Saúde Pública do Amazonas                                        | Evandro Chagas Institute                                                                                                           | Santos, M.C.; Silva, A.M.; Junior, W.D.C.; Barbagelata, L.S.; Ferreira, J.A.; Sousa, E.M.A.; da Silva, P.S.; Pinheiro, K.C.; L.C.; Sousa Junior, E.C.                                                                                                                                                                                                                                                                                                                                                                                                                                                                                                     |                                                                                                               |
| EPI_ISL_1261691                                   | Laboratório Paulo C. Azevedo                                                                    | Evandro Chagas Institute                                                                                                           | Santos, M.C.; Silva, A.M.; Junior, W.D.C.; Barbagelata, L.S.; Ferreira, J.A.; Sousa, E.M.A.; da Silva, P.S.; Pinheiro, K.C.; L.C.; Sousa Junior, E.C.                                                                                                                                                                                                                                                                                                                                                                                                                                                                                                     |                                                                                                               |
| EPI_ISL_1261692                                   | LACEN - Laboratório Central de Saúde Pública do Amapá                                           | Evandro Chagas Institute                                                                                                           | Santos, M.C.; Silva, A.M.; Junior, W.D.C.; Barbagelata, L.S.; Ferreira, J.A.; Sousa, E.M.A.; da Silva, P.S.; Pinheiro, K.C.; L.C.; Sousa Junior, E.C.                                                                                                                                                                                                                                                                                                                                                                                                                                                                                                     |                                                                                                               |
| EPI_ISL_1261693                                   | LACEN - Laboratório Central de Saúde Pública do Ceará                                           | Evandro Chagas Institute                                                                                                           | Santos, M.C.; Silva, A.M.; Junior, W.D.C.; Barbagelata, L.S.; Ferreira, J.A.; Sousa, E.M.A.; da Silva, P.S.; Pinheiro, K.C.; L.C.; Sousa Junior, E.C.                                                                                                                                                                                                                                                                                                                                                                                                                                                                                                     |                                                                                                               |
| EPI_ISL_1261694                                   | LACEN - Laboratório Central de Saúde Pública do Amazonas                                        | Evandro Chagas Institute                                                                                                           | Santos, M.C.; Silva, A.M.; Junior, W.D.C.; Barbagelata, L.S.; Ferreira, J.A.; Sousa, E.M.A.; da Silva, P.S.; Pinheiro, K.C.; L.C.; Sousa Junior, E.C.                                                                                                                                                                                                                                                                                                                                                                                                                                                                                                     |                                                                                                               |
| EPI_ISL_1262813                                   | hopital                                                                                         | National Reference Center for Viruses of Respiratory Infections, Institut Pasteur, Paris                                           | Marion Barbet, Sylvie Behillil, Méline Bizard, Angela Brisebarre, Camille Capel, Etienne Simon-Lorière, Vincent Enouf, Maud Vanpeene, Sylvie van der Werf, Lueuz-Ville Marianne                                                                                                                                                                                                                                                                                                                                                                                                                                                                           |                                                                                                               |
| EPI_ISL_1262913                                   | Outre Mer                                                                                       | National Reference Center for Viruses of Respiratory Infections, Institut Pasteur, Paris                                           | Marion Barbet, Sylvie Behillil, Méline Bizard, Angela Brisebarre, Camille Capel, Etienne Simon-Lorière, Vincent Enouf, Maud Vanpeene, Sylvie van der Werf, Rousset Dominique                                                                                                                                                                                                                                                                                                                                                                                                                                                                              |                                                                                                               |
| EPI_ISL_1262988                                   | Hopital                                                                                         | National Reference Center for Viruses of Respiratory Infections, Institut Pasteur, Paris                                           | Marion Barbet, Sylvie Behillil, Méline Bizard, Angela Brisebarre, Camille Capel, Etienne Simon-Lorière, Vincent Enouf, Maud Vanpeene, Sylvie van der Werf, Woerel Isabelle                                                                                                                                                                                                                                                                                                                                                                                                                                                                                |                                                                                                               |
| EPI_ISL_1263298                                   | Ministry of Health Turkey                                                                       | Ministry of Health Turkey                                                                                                          |                                                                                                                                                                                                                                                                                                                                                                                                                                                                                                                                                                                                                                                           | Fatma Bayraktar, Yasemin Cosgun, Suleyman Yalcin, Gulay Korukluoglu                                           |
| EPI_ISL_1263461                                   | UW Virology Lab                                                                                 | UW Virology Lab                                                                                                                    | Pavitra Roychoudhury, Hong Xie, Lasata Shrestha, Shah Mohamed Bakhsh, Michelle Lin, Noah Baker, Sean Ellis, Saraswathi Sathees, Meei-Li Huang, Keith R Jerome, Alexander Greninger                                                                                                                                                                                                                                                                                                                                                                                                                                                                        |                                                                                                               |

|                                                                                                                                                                                           |                                                                                                                 |                                                                                                                         |                                                                                                                                                                                                                                                                                                                                                                                                                                                                                                                                                                                                                                                                                                                                                                                                                                                                                                                                                                                                                                   |
|-------------------------------------------------------------------------------------------------------------------------------------------------------------------------------------------|-----------------------------------------------------------------------------------------------------------------|-------------------------------------------------------------------------------------------------------------------------|-----------------------------------------------------------------------------------------------------------------------------------------------------------------------------------------------------------------------------------------------------------------------------------------------------------------------------------------------------------------------------------------------------------------------------------------------------------------------------------------------------------------------------------------------------------------------------------------------------------------------------------------------------------------------------------------------------------------------------------------------------------------------------------------------------------------------------------------------------------------------------------------------------------------------------------------------------------------------------------------------------------------------------------|
| EPI_ISL_1265833                                                                                                                                                                           | CERBALLIANCE PACA                                                                                               | CNR Virus des Infections Respiratoires - France SUD                                                                     | Antonin Bal, Gregory Destras, Gwendolyne Burfin, Hadrien Regue, Quentin Semanas, Martine Valette, Bruno Lina, Laurence Josset                                                                                                                                                                                                                                                                                                                                                                                                                                                                                                                                                                                                                                                                                                                                                                                                                                                                                                     |
| EPI_ISL_1273117, EPI_ISL_1273136                                                                                                                                                          | Lab voor klinische biologie                                                                                     | Lab voor klinische biologie                                                                                             | Marija Janevska, Hannelore Hamerlinck, Bruno Verhasselt                                                                                                                                                                                                                                                                                                                                                                                                                                                                                                                                                                                                                                                                                                                                                                                                                                                                                                                                                                           |
| EPI_ISL_1277629                                                                                                                                                                           | Lighthouse Lab in Glasgow                                                                                       | Wellcome Sanger Institute for the COVID-19 Genomics UK (COG-UK) Consortium                                              | Harper VanSteenhouse, Yumi Kasai, David Gray, Carol Clugston, Anna Dominiczak and Alex Alderton, Roberto Amato, Jeffrey Barrett, Sonia Goncalves, Ewan Harrison, David K. Jackson, Ian Johnston, Dominic Kwiatkowski, Cordelia Langford, John Sillitoe on behalf of the Wellcome Sanger Institute COVID-19 Surveillance Team                                                                                                                                                                                                                                                                                                                                                                                                                                                                                                                                                                                                                                                                                                      |
| EPI_ISL_1279276                                                                                                                                                                           | Centro de Investigación Biomédica del Noreste (CIBIN)                                                           | Instituto Nacional de Enfermedades Respiratorias (INER):<br>Centro de Investigación en Enfermedades Infecciosas (CIENI) | Consortio Mexicano de Vigilancia Genómica (CoViGen-Mex). Authors (in alphabetical order): Julio Elias Alvarado-Yaah, Carlos F. Arias, Santiago Ávila-Ríos, Víctor Hugo Borja-Aburto, Celia Boukadida, Juan Bautista Chale-Dzul , José Antonio Enciso-Moreno, Gloria Elena Espinoza-Ayala, Fernando Fontove-Herrera, Concepción Grajales-Muñiz, Ricardo Grande, Alfredo Herrera-Estrella, Carla Ivón Herrera-Najera, Pavel Isa, Brenda Irasema Maldonado-Meza, Bernardo Martínez-Miguel, Margarita Matías-Florentino, María Guadalupe de Jesús Mireles-Rivera, Gloria María Molina-Salinas, Hector Montoya-Fuentes, José Esteban Muñoz-Medina, José de Jesús Nuñez-Contreras, Alicia Ocaña-Mondragón, Luis Alberto Ochoa-Carrera, Hector Esteban Paz-Juárez, Francisco Pulido, Helen Haydee Fernanda Ramirez-Plascencia, Angel Gustavo Salas-Lais, Jorge Ivan Salinal-Nevarez, Alejandro Sanchez-Flores, Clara Esperanza Santacruz-Tinoco, María Guadalupe Santiago-Mauricio , Nelly Sélem-Mojica, Blanca Taboada , Gloria Vazquez |
| EPI_ISL_1280655                                                                                                                                                                           | Bayerisches Landesamt für Gesundheit und Lebensmittelsicherheit (LGL)                                           | Robert Koch Institute                                                                                                   | unknown                                                                                                                                                                                                                                                                                                                                                                                                                                                                                                                                                                                                                                                                                                                                                                                                                                                                                                                                                                                                                           |
| EPI_ISL_1281024                                                                                                                                                                           | SYNLAB MVZ Weiden                                                                                               | Robert Koch Institute                                                                                                   | unknown                                                                                                                                                                                                                                                                                                                                                                                                                                                                                                                                                                                                                                                                                                                                                                                                                                                                                                                                                                                                                           |
| EPI_ISL_1282219, EPI_ISL_1282294, EPI_ISL_1282302                                                                                                                                         | LabKom - Labor Augsburg MVZ GmbH                                                                                | Robert Koch Institute                                                                                                   | unknown                                                                                                                                                                                                                                                                                                                                                                                                                                                                                                                                                                                                                                                                                                                                                                                                                                                                                                                                                                                                                           |
| EPI_ISL_1284388, EPI_ISL_1286854                                                                                                                                                          | SYNLAB MVZ Weiden                                                                                               | Robert Koch Institute                                                                                                   | unknown                                                                                                                                                                                                                                                                                                                                                                                                                                                                                                                                                                                                                                                                                                                                                                                                                                                                                                                                                                                                                           |
| EPI_ISL_1286876                                                                                                                                                                           | Synlab MVZ Augsburg                                                                                             | Robert Koch Institute                                                                                                   | unknown                                                                                                                                                                                                                                                                                                                                                                                                                                                                                                                                                                                                                                                                                                                                                                                                                                                                                                                                                                                                                           |
| EPI_ISL_1287630, EPI_ISL_1287632, EPI_ISL_1287633, EPI_ISL_1287634, EPI_ISL_1287635, EPI_ISL_1287636, EPI_ISL_1287637, EPI_ISL_1287638, EPI_ISL_1287639, EPI_ISL_1287640, EPI_ISL_1287641 |                                                                                                                 |                                                                                                                         |                                                                                                                                                                                                                                                                                                                                                                                                                                                                                                                                                                                                                                                                                                                                                                                                                                                                                                                                                                                                                                   |
| see above                                                                                                                                                                                 | Istituto Zooprofilattico Sperimentale del Mezzogiorno                                                           | TIGEM                                                                                                                   | Antonio Grimaldi Patrizia Annunziata Francesco Panariello Biancamaria Pierrri Claudia Tiberio Valentina Bouche Chiara Colantuono Maria Concetta Cuomo Denise Di Concilio Lucio Di Filippo Anna Manfredi Marcello Salvi Antonio Limone Luigi Atripaldi Pellegrino Cerino Andrea Ballabio Davide Cacchiarelli                                                                                                                                                                                                                                                                                                                                                                                                                                                                                                                                                                                                                                                                                                                       |
| EPI_ISL_1289218, EPI_ISL_1289219, EPI_ISL_1289220, EPI_ISL_1289221, EPI_ISL_1289222, EPI_ISL_1289223, EPI_ISL_1289224                                                                     | Dutch COVID-19 response team                                                                                    | National Institute for Public Health and the Environment (RIVM)                                                         | Adam Meijer, Harry Vennema, Dirk Eggink, Jeroen Cremer, Sharon van den Brink, Bas van der Veer, AnneMarie van den Brandt, Florian Zwagemaker, Dennis Schmitz, Chantal Reusken, on behalf of the national COVID-19 response team                                                                                                                                                                                                                                                                                                                                                                                                                                                                                                                                                                                                                                                                                                                                                                                                   |
| EPI_ISL_1289960                                                                                                                                                                           | Laboratory of Virology, Ribeirão Preto General Hospital, Ribeirão Preto Medical School, University of São Paulo | Laboratory of Oncology, Blood Center of Ribeirão Preto, Ribeirão Preto School of Medicine, University of São Paulo      | CAMPOS, MR.; SANTOS, A.L.P.; YAMAMOTO, A.Y.; COLLI, L.M.; FONSECA, B.A.L.; BELLISSIMO-RODRIGUES, F.                                                                                                                                                                                                                                                                                                                                                                                                                                                                                                                                                                                                                                                                                                                                                                                                                                                                                                                               |
| EPI_ISL_1290803                                                                                                                                                                           | INMI Lazzaro Spallanzani IRCCS                                                                                  | INMI Lazzaro Spallanzani IRCCS                                                                                          | E Giombini, F Messina, M Rueca, O Butera, CEM Gruber, F Santini, B Bartolini, G Bonfiglio, A Di Caro, MR Capobianchi                                                                                                                                                                                                                                                                                                                                                                                                                                                                                                                                                                                                                                                                                                                                                                                                                                                                                                              |
| EPI_ISL_1293053, EPI_ISL_1293054, EPI_ISL_1293055                                                                                                                                         | LACEN de Rondonia                                                                                               | Instituto Adolfo Lutz, Interdisciplinary Procedures Center, Strategic Laboratory                                        | Claudio Tavares Sacchi, Claudia Regina Gonçalves, Erica Valessa Ramos Gomes, Karoline Rodrigues Campos, Caio Vinicius Dias Lopes                                                                                                                                                                                                                                                                                                                                                                                                                                                                                                                                                                                                                                                                                                                                                                                                                                                                                                  |
| EPI_ISL_1293059, EPI_ISL_1293063, EPI_ISL_1293067, EPI_ISL_1293075, EPI_ISL_1293077, EPI_ISL_1293080                                                                                      | IAL Regional de Sorocaba                                                                                        | Instituto Adolfo Lutz, Interdisciplinary Procedures Center, Strategic Laboratory                                        | Claudio Tavares Sacchi, Claudia Regina Gonçalves, Erica Valessa Ramos Gomes, Karoline Rodrigues Campos, Caio Vinicius Dias Lopes                                                                                                                                                                                                                                                                                                                                                                                                                                                                                                                                                                                                                                                                                                                                                                                                                                                                                                  |
| EPI_ISL_1293215                                                                                                                                                                           | Yale Clinical Virology Lab                                                                                      | Grubaugh Lab - Yale School of Public Health                                                                             | Joseph Fauver, Mallory Breban, Isabell Ott, Tara Alpert, Mary Petrone, Chantal Brito, Chantal Vogels, Annie Watkins, Chaney Kalinich, Jessica Rothman, Marie L. Landry, Nathan Grubaugh                                                                                                                                                                                                                                                                                                                                                                                                                                                                                                                                                                                                                                                                                                                                                                                                                                           |
| EPI_ISL_1295608                                                                                                                                                                           | Ospedale "F. Spaziani" Frosinone                                                                                | INMI Lazzaro Spallanzani IRCCS                                                                                          | B Bartolini, E Giombini, F Messina, M Rueca, G Bonfiglio, O Butera, CEM Gruber, F Santini, R Pulselli, C Gargiulo, C Sias, A Di Caro, MR Capobianchi                                                                                                                                                                                                                                                                                                                                                                                                                                                                                                                                                                                                                                                                                                                                                                                                                                                                              |
| EPI_ISL_1295609                                                                                                                                                                           | INMI Lazzaro Spallanzani IRCCS                                                                                  | INMI Lazzaro Spallanzani IRCCS                                                                                          | F Messina, M Rueca, G Bonfiglio, O Butera, CEM Gruber, F Santini, B Bartolini, E Giombini, A Di Caro, MR Capobianchi                                                                                                                                                                                                                                                                                                                                                                                                                                                                                                                                                                                                                                                                                                                                                                                                                                                                                                              |
| EPI_ISL_1295610                                                                                                                                                                           | Presidio Ospedaliero G. B. Grassi ASL RM3                                                                       | INMI Lazzaro Spallanzani IRCCS                                                                                          | O Butera, CEM Gruber, F Santini, B Bartolini, E Giombini, F Messina, M Rueca, G Bonfiglio, F Tabacco, E Ristori, MR Capobianchi, A Di Caro                                                                                                                                                                                                                                                                                                                                                                                                                                                                                                                                                                                                                                                                                                                                                                                                                                                                                        |
| EPI_ISL_1295611                                                                                                                                                                           | Ospedale "F. Spaziani" Frosinone                                                                                | INMI Lazzaro Spallanzani IRCCS                                                                                          | M Rueca, G Bonfiglio, O Butera, CEM Gruber, F Santini, B Bartolini, E Giombini, F Messina, R Pulselli, G Brocco, C Gargiulo, MR Capobianchi, A Di Caro                                                                                                                                                                                                                                                                                                                                                                                                                                                                                                                                                                                                                                                                                                                                                                                                                                                                            |
| EPI_ISL_1295612                                                                                                                                                                           | Ospedale "F. Spaziani" Frosinone                                                                                | INMI Lazzaro Spallanzani IRCCS                                                                                          | F Messina, M Rueca, G Bonfiglio, O Butera, CEM Gruber, F Santini, B Bartolini, E Giombini, R Pulselli, C Sias, G Brocco, A Di Caro, MR Capobianchi                                                                                                                                                                                                                                                                                                                                                                                                                                                                                                                                                                                                                                                                                                                                                                                                                                                                                |
| EPI_ISL_1295613                                                                                                                                                                           | Fondazione Policlinico Universitario "A. Gemelli" IRCCS                                                         | INMI Lazzaro Spallanzani IRCCS                                                                                          | B Bartolini, E Giombini, F Messina, M Rueca, G Bonfiglio, O Butera, CEM Gruber, F Santini, P Cattani, M Sanguinetti, A Di Caro, MR Capobianchi                                                                                                                                                                                                                                                                                                                                                                                                                                                                                                                                                                                                                                                                                                                                                                                                                                                                                    |
| EPI_ISL_1296218, EPI_ISL_1296219, EPI_ISL_1296220                                                                                                                                         | University Hospitals of Geneva, Laboratory of Virology                                                          | HUG, Laboratory of Virology and the Health2030 Genome Center                                                            | Samuel Cordey, Ana Rita Goncalves, Laurent Kaiser, Lorenzo Cerutti, Henri Peugeot, Melyssa Elies, Deborah Penet, Keith Harshman, Ioannis Xenarios, Emmanouil Dermitzakis                                                                                                                                                                                                                                                                                                                                                                                                                                                                                                                                                                                                                                                                                                                                                                                                                                                          |
| EPI_ISL_1296238, EPI_ISL_1296239, EPI_ISL_1296240, EPI_ISL_1296241, EPI_ISL_1296242, EPI_ISL_1296248, EPI_ISL_1296249, EPI_ISL_1296250, EPI_ISL_1296251                                   | Università degli Studi di Perugia                                                                               | Istituto Zooprofilattico Sperimentale dell'Abruzzo e Molise "G. Caporale"                                               | Mencacci A, Camilloni B, Lorusso A, Marcacci M, Di Domenico M, Ancora M, Curini V, Mangone I, Rinaldi A, Scialabba S, Di Pasquale A, Cammà C, Puglia I, Calistri P, Savini G                                                                                                                                                                                                                                                                                                                                                                                                                                                                                                                                                                                                                                                                                                                                                                                                                                                      |
| EPI_ISL_1296253, EPI_ISL_1296254, EPI_ISL_1296255, EPI_ISL_1296256                                                                                                                        | Laboratorio Analisi Osp. Città di Castello - Azienda USL Umbria 1                                               | Istituto Zooprofilattico Sperimentale dell'Abruzzo e Molise "G. Caporale"                                               | Malagigi V, Tacconi P, Mencacci A, Camilloni B, Lorusso A, Marcacci M, Di Domenico M, Ancora M, Curini V, Mangone I, Rinaldi A, Scialabba S, Di Pasquale A, Cammà C, Puglia I, Calistri P, Savini G                                                                                                                                                                                                                                                                                                                                                                                                                                                                                                                                                                                                                                                                                                                                                                                                                               |
| EPI_ISL_1296258                                                                                                                                                                           | Università degli Studi di Perugia                                                                               | Istituto Zooprofilattico Sperimentale dell'Abruzzo e Molise "G. Caporale"                                               | Mencacci A, Camilloni B, Lorusso A, Marcacci M, Di Domenico M, Ancora M, Curini V, Mangone I, Rinaldi A, Scialabba S, Di Pasquale A, Cammà C, Puglia I, Calistri P, Savini G                                                                                                                                                                                                                                                                                                                                                                                                                                                                                                                                                                                                                                                                                                                                                                                                                                                      |
| EPI_ISL_1296264                                                                                                                                                                           | Azienda Ospedaliera Terni                                                                                       | Istituto Zooprofilattico Sperimentale dell'Abruzzo e Molise "G. Caporale"                                               | Palumbo M, Scaccetti A, Lorusso A, Marcacci M, Di Domenico M, Ancora M, Curini V, Mangone I, Rinaldi A, Scialabba S, Di Pasquale A, Cammà C, Puglia I, Calistri P, Savini G                                                                                                                                                                                                                                                                                                                                                                                                                                                                                                                                                                                                                                                                                                                                                                                                                                                       |
| EPI_ISL_1296268                                                                                                                                                                           | Università degli Studi di Perugia                                                                               | Istituto Zooprofilattico Sperimentale dell'Abruzzo e Molise "G. Caporale"                                               | Mencacci A, Camilloni B, Lorusso A, Marcacci M, Di Domenico M, Ancora M, Curini V, Mangone I, Rinaldi A, Scialabba S, Di Pasquale A, Cammà C, Puglia I, Calistri P, Savini G                                                                                                                                                                                                                                                                                                                                                                                                                                                                                                                                                                                                                                                                                                                                                                                                                                                      |
| EPI_ISL_1296272                                                                                                                                                                           | Azienda Ospedaliera Terni                                                                                       | Istituto Zooprofilattico Sperimentale dell'Abruzzo e Molise "G. Caporale"                                               | Palumbo M, Scaccetti A, Lorusso A, Marcacci M, Di Domenico M, Ancora M, Curini V, Mangone I, Rinaldi A, Scialabba S, Di Pasquale A, Cammà C, Puglia I, Calistri P, Savini G                                                                                                                                                                                                                                                                                                                                                                                                                                                                                                                                                                                                                                                                                                                                                                                                                                                       |
| EPI_ISL_1296279                                                                                                                                                                           | Università degli Studi di Perugia                                                                               | Istituto Zooprofilattico Sperimentale dell'Abruzzo e Molise "G. Caporale"                                               | Mencacci A, Camilloni B, Lorusso A, Marcacci M, Di Domenico M, Ancora M, Curini V, Mangone I, Rinaldi A, Scialabba S, Di Pasquale A, Cammà C, Puglia I, Calistri P, Savini G                                                                                                                                                                                                                                                                                                                                                                                                                                                                                                                                                                                                                                                                                                                                                                                                                                                      |
| EPI_ISL_1296285, EPI_ISL_1296286, EPI_ISL_1296287                                                                                                                                         | Azienda Ospedaliera Terni                                                                                       | Istituto Zooprofilattico Sperimentale dell'Abruzzo e Molise "G. Caporale"                                               | Palumbo M, Scaccetti A, Lorusso A, Marcacci M, Di Domenico M, Ancora M, Curini V, Mangone I, Rinaldi A, Scialabba S, Di Pasquale A, Cammà C, Puglia I, Calistri P, Savini G                                                                                                                                                                                                                                                                                                                                                                                                                                                                                                                                                                                                                                                                                                                                                                                                                                                       |
| EPI_ISL_1296288                                                                                                                                                                           | Università degli Studi di Perugia                                                                               | Istituto Zooprofilattico Sperimentale dell'Abruzzo e Molise "G. Caporale"                                               | Mencacci A, Camilloni B, Lorusso A, Marcacci M, Di Domenico M, Ancora M, Curini V, Mangone I, Rinaldi A, Scialabba S, Di Pasquale A, Cammà C, Puglia I, Calistri P, Savini G                                                                                                                                                                                                                                                                                                                                                                                                                                                                                                                                                                                                                                                                                                                                                                                                                                                      |
| EPI_ISL_1296289, EPI_ISL_1296290, EPI_ISL_1296291                                                                                                                                         | Università degli Studi di Perugia                                                                               | Istituto Zooprofilattico Sperimentale dell'Abruzzo e Molise "G. Caporale"                                               | Mencacci A, Camilloni B, Lorusso A, Marcacci M, Di Domenico M, Ancora M, Curini V, Mangone I, Rinaldi A, Scialabba S, Di Pasquale A, Cammà C, Puglia I, Calistri P, Savini G                                                                                                                                                                                                                                                                                                                                                                                                                                                                                                                                                                                                                                                                                                                                                                                                                                                      |
| EPI_ISL_1299500                                                                                                                                                                           | Azienda USL Umbria 2                                                                                            | Istituto Zooprofilattico Sperimentale dell'Abruzzo e Molise "G. Caporale"                                               | Proietti A, Pistoni E, Lorusso A, Marcacci M, Di Domenico M, Ancora M, Curini V, Mangone I, Rinaldi A, Scialabba S, Di Pasquale A, Cammà C, Puglia I, Calistri P, Savini G                                                                                                                                                                                                                                                                                                                                                                                                                                                                                                                                                                                                                                                                                                                                                                                                                                                        |

|                                                                                                                                                                          |                                                                     |                                                                                  |                                                                                                                                                                                                                                                                                                            |
|--------------------------------------------------------------------------------------------------------------------------------------------------------------------------|---------------------------------------------------------------------|----------------------------------------------------------------------------------|------------------------------------------------------------------------------------------------------------------------------------------------------------------------------------------------------------------------------------------------------------------------------------------------------------|
| EPI_ISL_1299502, EPI_ISL_1299503                                                                                                                                         | Azienda Ospedaliera Terni                                           | Istituto Zooprofilattico Sperimentale dell'Abruzzo e Molise "G. Caporale"        | Palumbo M, ScaccettiA, Lorusso A, Marcacci M, Di Domenico M, Ancora M, Curini V, Mangone I, Rinaldi A, Scialabba S, Di Pasquale A, Cammà C, Puglia I, Calistri P, Savini G                                                                                                                                 |
| EPI_ISL_1299512, EPI_ISL_1299513, EPI_ISL_1299517, EPI_ISL_1299518                                                                                                       | Azienda Ospedaliera Terni                                           | Istituto Zooprofilattico Sperimentale dell'Abruzzo e Molise "G. Caporale"        | Palumbo m, Scaccetti A, Lorusso A, Marcacci M, Di Domenico M, Ancora M, Curini V, Mangone I, Rinaldi A, Scialabba S, Di Pasquale A, Cammà C, Puglia I, Calistri P, Savini G                                                                                                                                |
| EPI_ISL_1299532                                                                                                                                                          | Azienda USL Umbria 2                                                | Istituto Zooprofilattico Sperimentale dell'Abruzzo e Molise "G. Caporale"        | Proietti A, Pistoni E, Lorusso A, Marcacci M, Di Domenico M, Ancora M, Curini V, Mangone I, Rinaldi A, Scialabba S, Di Pasquale A, Cammà C, Puglia I, Calistri P, Savini G                                                                                                                                 |
| EPI_ISL_1299536, EPI_ISL_1299540                                                                                                                                         | Istituto Zooprofilattico Sperimentale Umbria e Marche "Togo Rosati" | Istituto Zooprofilattico Sperimentale dell'Abruzzo e Molise "G. Caporale"        | Biagetti M, Giammarioli M, Lorusso A, Marcacci M, Di Domenico M, Ancora M, Curini V, Mangone I, Rinaldi A, Scialabba S, Di Pasquale A, Cammà C, Puglia I, Calistri P, Savini G                                                                                                                             |
| EPI_ISL_1299543                                                                                                                                                          | Azienda USL Umbria 2                                                | Istituto Zooprofilattico Sperimentale dell'Abruzzo e Molise "G. Caporale"        | Proietti A, Pistoni E, Lorusso A, Marcacci M, Di Domenico M, Ancora M, Curini V, Mangone I, Rinaldi A, Scialabba S, Di Pasquale A, Cammà C, Puglia I, Calistri P, Savini G                                                                                                                                 |
| EPI_ISL_1299544                                                                                                                                                          | Istituto Zooprofilattico Sperimentale Umbria e Marche "Togo Rosati" | Istituto Zooprofilattico Sperimentale dell'Abruzzo e Molise "G. Caporale"        | Biagetti M, Giammarioli M, Lorusso A, Marcacci M, Di Domenico M, Ancora M, Curini V, Mangone I, Rinaldi A, Scialabba S, Di Pasquale A, Cammà C, Puglia I, Calistri P, Savini G                                                                                                                             |
| EPI_ISL_1299546, EPI_ISL_1299547, EPI_ISL_1299548, EPI_ISL_1299553                                                                                                       | Laboratorio Analisi Osp. Città di Castello - Azienda USL Umbria1    | Istituto Zooprofilattico Sperimentale dell'Abruzzo e Molise "G. Caporale"        | Malagigi V, Tacconi P, Lorusso A, Marcacci M, Di Domenico M, Ancora M, Curini V, Mangone I, Rinaldi A, Scialabba S, Di Pasquale A, Cammà C, Puglia I, Calistri P, Savini G                                                                                                                                 |
| EPI_ISL_1299554                                                                                                                                                          | Azienda USL Umbria 2                                                | Istituto Zooprofilattico Sperimentale dell'Abruzzo e Molise "G. Caporale"        | Proietti A, Pistoni E, Lorusso A, Marcacci M, Di Domenico M, Ancora M, Curini V, Mangone I, Rinaldi A, Scialabba S, Di Pasquale A, Cammà C, Puglia I, Calistri P, Savini G                                                                                                                                 |
| EPI_ISL_1299555                                                                                                                                                          | Laboratorio Analisi Osp. Città di Castello - Azienda USL Umbria1    | Istituto Zooprofilattico Sperimentale dell'Abruzzo e Molise "G. Caporale"        | Malagigi V, Tacconi P, Lorusso A, Marcacci M, Di Domenico M, Ancora M, Curini V, Mangone I, Rinaldi A, Scialabba S, Di Pasquale A, Cammà C, Puglia I, Calistri P, Savini G                                                                                                                                 |
| EPI_ISL_1299556, EPI_ISL_1299557, EPI_ISL_1299558, EPI_ISL_1299559, EPI_ISL_1299560, EPI_ISL_1299561, EPI_ISL_1299562, EPI_ISL_1299564, EPI_ISL_1299565, EPI_ISL_1299566 | Università degli Studi di Perugia                                   | Istituto Zooprofilattico Sperimentale dell'Abruzzo e Molise "G. Caporale"        | Mencacci A, Camilloni B, Lorusso A, Marcacci M, Di Domenico M, Ancora M, Curini V, Mangone I, Rinaldi A, Scialabba S, Di Pasquale A, Cammà C, Puglia I, Calistri P, Savini G                                                                                                                               |
| EPI_ISL_1301964                                                                                                                                                          | National Virus Reference Laboratory                                 | National Virus Reference Laboratory                                              | Zoe Yandle, Charlene Bennett, Gabriel Gonzalez, Michael Carr, Jonathan Dean, Cillian F De Gascun                                                                                                                                                                                                           |
| EPI_ISL_1303502, EPI_ISL_1303503                                                                                                                                         | LACEN de Rondonia                                                   | Instituto Adolfo Lutz, Interdisciplinary Procedures Center, Strategic Laboratory | Claudio Tavares Sacchi, Claudia Regina Gonçalves, Erica Valessa Ramos Gomes, Karoline Rodrigues Campos, Caio Vinicius Dias Lopes                                                                                                                                                                           |
| EPI_ISL_1303506                                                                                                                                                          | LACEN do Distrito Federal                                           | Instituto Adolfo Lutz, Interdisciplinary Procedures Center, Strategic Laboratory | Claudio Tavares Sacchi, Claudia Regina Gonçalves, Erica Valessa Ramos Gomes, Karoline Rodrigues Campos, Caio Vinicius Dias Lopes                                                                                                                                                                           |
| EPI_ISL_1303509                                                                                                                                                          | LACEN do Estado de Tocantins                                        | Instituto Adolfo Lutz, Interdisciplinary Procedures Center, Strategic Laboratory | Claudio Tavares Sacchi, Claudia Regina Gonçalves, Erica Valessa Ramos Gomes, Karoline Rodrigues Campos, Caio Vinicius Dias Lopes                                                                                                                                                                           |
| EPI_ISL_1303512, EPI_ISL_1303513, EPI_ISL_1303514, EPI_ISL_1303515                                                                                                       | LACEN do Estado de Goias                                            | Instituto Adolfo Lutz, Interdisciplinary Procedures Center, Strategic Laboratory | Claudio Tavares Sacchi, Claudia Regina Gonçalves, Erica Valessa Ramos Gomes, Karoline Rodrigues Campos, Caio Vinicius Dias Lopes                                                                                                                                                                           |
| EPI_ISL_1303520, EPI_ISL_1303522, EPI_ISL_1303525, EPI_ISL_1303529                                                                                                       | IAL Regional de São Jose do Rio Preto                               | Instituto Adolfo Lutz, Interdisciplinary Procedures Center, Strategic Laboratory | Claudio Tavares Sacchi, Claudia Regina Gonçalves, Erica Valessa Ramos Gomes, Karoline Rodrigues Campos, Caio Vinicius Dias Lopes                                                                                                                                                                           |
| EPI_ISL_1303536                                                                                                                                                          | Hospital Heliopolis                                                 | Instituto Adolfo Lutz, Interdisciplinary Procedures Center, Strategic Laboratory | Claudio Tavares Sacchi, Claudia Regina Gonçalves, Erica Valessa Ramos Gomes, Karoline Rodrigues Campos, Caio Vinicius Dias Lopes                                                                                                                                                                           |
| EPI_ISL_1303537                                                                                                                                                          | Hospital Estadual de Vila Alpina                                    | Instituto Adolfo Lutz, Interdisciplinary Procedures Center, Strategic Laboratory | Claudio Tavares Sacchi, Claudia Regina Gonçalves, Erica Valessa Ramos Gomes, Karoline Rodrigues Campos, Caio Vinicius Dias Lopes                                                                                                                                                                           |
| EPI_ISL_1303539                                                                                                                                                          | Hospital Presidente                                                 | Instituto Adolfo Lutz, Interdisciplinary Procedures Center, Strategic Laboratory | Claudio Tavares Sacchi, Claudia Regina Gonçalves, Erica Valessa Ramos Gomes, Karoline Rodrigues Campos, Caio Vinicius Dias Lopes                                                                                                                                                                           |
| EPI_ISL_1303541                                                                                                                                                          | Hospital Municipal Cidade Tiradentes Carmen Prudente                | Instituto Adolfo Lutz, Interdisciplinary Procedures Center, Strategic Laboratory | Claudio Tavares Sacchi, Claudia Regina Gonçalves, Erica Valessa Ramos Gomes, Karoline Rodrigues Campos, Caio Vinicius Dias Lopes                                                                                                                                                                           |
| EPI_ISL_1303542, EPI_ISL_1303543                                                                                                                                         | Hospital Estadual de Campanha Barradas                              | Instituto Adolfo Lutz, Interdisciplinary Procedures Center, Strategic Laboratory | Claudio Tavares Sacchi, Claudia Regina Gonçalves, Erica Valessa Ramos Gomes, Karoline Rodrigues Campos, Caio Vinicius Dias Lopes                                                                                                                                                                           |
| EPI_ISL_1303545                                                                                                                                                          | Hospital Municipal Cidade Tiradentes Carmen Prudente                | Instituto Adolfo Lutz, Interdisciplinary Procedures Center, Strategic Laboratory | Claudio Tavares Sacchi, Claudia Regina Gonçalves, Erica Valessa Ramos Gomes, Karoline Rodrigues Campos, Caio Vinicius Dias Lopes                                                                                                                                                                           |
| EPI_ISL_1303546, EPI_ISL_1303547, EPI_ISL_1303548, EPI_ISL_1303549                                                                                                       | UPA Vila Santa Catarina                                             | Instituto Adolfo Lutz, Interdisciplinary Procedures Center, Strategic Laboratory | Claudio Tavares Sacchi, Claudia Regina Gonçalves, Erica Valessa Ramos Gomes, Karoline Rodrigues Campos, Caio Vinicius Dias Lopes                                                                                                                                                                           |
| EPI_ISL_1305221, EPI_ISL_1305222, EPI_ISL_1305226                                                                                                                        | Houston Methodist Hospital                                          | Houston Methodist Hospital                                                       | S. Wesley Long, Randall J. Olsen, Paul A. Christensen, Sishir Subedi, Robert Olson, James J. Davis, Matthew Ojeda Saavedra, Prasanti Yerramilli, Layne Pruitt, Kristina Reppond, Madison N. Shtyer, Jessica Cambric, Ilya J. Finkelstein, Jimmy Gollihar, and James M. Musser                              |
| EPI_ISL_1307416                                                                                                                                                          | Pandemic Response Lab - NYC                                         | Pandemic Response Lab, R&D                                                       | Henry Lee, Michael Hammerling, Melissa Hopkins, Cybill del Castillo, Shinyoung Clair Kang, William Ward, Pradeep Bugga, Sol Rey, Dylan Law, Haiping Hao, Jon Laurent                                                                                                                                       |
| EPI_ISL_1307715                                                                                                                                                          | Hospital General Universitario Gregorio Marañón                     | Hospital General Universitario Gregorio Marañón                                  | Sergio Buenestado Serrano, Pedro Sola Campoy, Laura Pérez-Lago, Cristina Rodríguez-Grande, Pilar Catalán, Patricia Muñoz, Darío García de Viedma                                                                                                                                                           |
| EPI_ISL_1307757, EPI_ISL_1307791, EPI_ISL_1307792, EPI_ISL_1307795                                                                                                       | Istituto Zooprofilattico Sperimentale del Mezzogiorno               | TIGEM                                                                            | Antonio Girmaldi Patrizia Annunziata Francesco Panariello Biancamaria Pierri Claudia Tiberio Valentina Bouche Chiara Colantuono Maria Concetta Cuomo Denise Di Concilio Lucio Di Filippo Anna Manfredi Marcello Salvi Antonio Limone Luigi Atripaldi Pellegrino Cerino Andrea Ballabio Davide Cacchiarelli |
| EPI_ISL_1310787                                                                                                                                                          | Ohio State University Wexner Medical Center                         | James Polaris Molecular Laboratory                                               | Garee J, Ru P, Chappell D, Chang Y-S, Tu H, Snyder P, Pancholi P, Koenig S, Corcoran S, Jones D                                                                                                                                                                                                            |
| EPI_ISL_1310788                                                                                                                                                          | Ohio State University Wexner Medical Center                         | James Polaris Molecular Laboratory                                               | Garee J, Tu H, Snyder P, Pancholi P, Koenig S, Corcoran S, Jones D                                                                                                                                                                                                                                         |
| EPI_ISL_1312150, EPI_ISL_1312153, EPI_ISL_1312187, EPI_ISL_1312245, EPI_ISL_1312266, EPI_ISL_1312267                                                                     | KU Leuven, Rega Institute, Clinical and Epidemiological Virology    | KU Leuven, Rega Institute, Clinical and Epidemiological Virology                 | Tony Wawina-Bokalanga, Bert Vanmechelen, Joan Marti-Carerras, Piet Maes                                                                                                                                                                                                                                    |
| EPI_ISL_1313008                                                                                                                                                          | LBA                                                                 | CNR Virus des Infections Respiratoires - France SUD                              | Antonin Bal, Gregory Destras, Gwendolyne Burfin, Hadrien Regue, Quentin Semanas, Martine Valette, Bruno Lina, Laurence Josset                                                                                                                                                                              |
| EPI_ISL_1313158                                                                                                                                                          | BIOMNIS LYON                                                        | CNR Virus des Infections Respiratoires - France SUD                              | Antonin Bal, Gregory Destras, Gwendolyne Burfin, Hadrien Regue, Quentin Semanas, Martine Valette, Bruno Lina, Laurence Josset                                                                                                                                                                              |
| EPI_ISL_1315073                                                                                                                                                          | San Diego County Public Health Laboratory                           | Andersen lab at Scripps Research                                                 | SEARCH Alliance San Diego with Tracy Basler, Jovan Shephard, Brett Austin                                                                                                                                                                                                                                  |
| EPI_ISL_1315652                                                                                                                                                          | Lighthouse Lab in Cambridge                                         | Wellcome Sanger Institute for the COVID-19 Genomics UK (COG-UK) Consortium       | Rob Howes, The Lighthouse Lab in Cambridge and Alex Alderton, Roberto Amato, Jeffrey Barrett, Sonia Goncalves, Ewan Harrison, David K. Jackson, Ian Johnston, Dominic Kwiatkowski, Cordelia Langford, John Sillitoe on behalf of the Wellcome Sanger Institute COVID-19 Surveillance Team                  |
| EPI_ISL_1318167                                                                                                                                                          | SYNLAB                                                              | GIGA Medical Genomics                                                            | Keith Durkin, Maria Artesi, Sébastien Bontems, Raphaël Boreux, Bouchra Boujemla, Nathalie Renotte, Cécile Meex, Pierrette Melin, Marie-Pierre Hayette, Vincent Bours                                                                                                                                       |
| EPI_ISL_1318194                                                                                                                                                          | University of Liège COVID-19 testing center                         | GIGA Medical Genomics                                                            | Keith Durkin, Maria Artesi, Sébastien Bontems, Raphaël Boreux, Bouchra Boujemla, Nathalie Renotte, Cécile Meex, Pierrette Melin, Marie-Pierre Hayette, Vincent Bours                                                                                                                                       |



|                                                                                                                                                                                                                                                               |                                                               |                                                                       |                                                                                                                                                                 |                                                                                                                                                                                                                                                                                                                                                                                                                                                                                                                                                                                                 |
|---------------------------------------------------------------------------------------------------------------------------------------------------------------------------------------------------------------------------------------------------------------|---------------------------------------------------------------|-----------------------------------------------------------------------|-----------------------------------------------------------------------------------------------------------------------------------------------------------------|-------------------------------------------------------------------------------------------------------------------------------------------------------------------------------------------------------------------------------------------------------------------------------------------------------------------------------------------------------------------------------------------------------------------------------------------------------------------------------------------------------------------------------------------------------------------------------------------------|
| EPI_ISL_1321468, EPI_ISL_1321469, EPI_ISL_1321470, EPI_ISL_1321471, EPI_ISL_1321472, EPI_ISL_1321473                                                                                                                                                          | Genetica Molecular and Subdepartamento de Virologia ISP Chile | Instituto de Salud Publica de Chile                                   | Javier Tognarelli, Karen Orostica, Barbara Parra, Loredana Arata, Jaime Lagos, Gisselle Barra, Patricia Bustos, Rodrigo Fasce, Andres Castillo, Jorge Fernandez |                                                                                                                                                                                                                                                                                                                                                                                                                                                                                                                                                                                                 |
| EPI_ISL_1321734, EPI_ISL_1321735, EPI_ISL_1321736, EPI_ISL_1321737, EPI_ISL_1321738, EPI_ISL_1321739, EPI_ISL_1321740, EPI_ISL_1321741, EPI_ISL_1321742, EPI_ISL_1321743, EPI_ISL_1321747, EPI_ISL_1321748, EPI_ISL_1321750, EPI_ISL_1321751, EPI_ISL_1321752 | see above                                                     | Università degli Studi di Perugia                                     | Istituto Zooprofilattico Sperimentale dell'Abruzzo e Molise "G. Caporale"                                                                                       | Mencacci A, Camilloni B, Lorusso A, Marccacci M, Di Domenico M, Ancora M, Curini V, Mangone I, Rinaldi A, Scialabba S, Di Pasquale A, Cammà C, Puglia I, Calistri P, Savini G                                                                                                                                                                                                                                                                                                                                                                                                                   |
| EPI_ISL_1321759, EPI_ISL_1321761, EPI_ISL_1321765, EPI_ISL_1321778, EPI_ISL_1321781, EPI_ISL_1321790                                                                                                                                                          |                                                               | Azienda Ospedaliera Terni                                             | Istituto Zooprofilattico Sperimentale dell'Abruzzo e Molise "G. Caporale"                                                                                       | Palumbo M, Scaccetti A, Lorusso A, Marccacci M, Di Domenico M, Ancora M, Curini V, Mangone I, Rinaldi A, Scialabba S, Di Pasquale A, Cammà C, Puglia I, Calistri P, Savini G                                                                                                                                                                                                                                                                                                                                                                                                                    |
| EPI_ISL_1321803                                                                                                                                                                                                                                               |                                                               | Istituto Zooprofilattico Sperimentale Umbria e Marche "Togo Rosati"   | Istituto Zooprofilattico Sperimentale dell'Abruzzo e Molise "G. Caporale"                                                                                       | Biagetti M, Giammarioli M, Lorusso A, Marccacci M, Di Domenico M, Ancora M, Curini V, Mangone I, Rinaldi A, Scialabba S, Di Pasquale A, Cammà C, Puglia I, Calistri P, Savini G                                                                                                                                                                                                                                                                                                                                                                                                                 |
| EPI_ISL_1321805, EPI_ISL_1321806                                                                                                                                                                                                                              |                                                               | Università degli Studi di Perugia                                     | Istituto Zooprofilattico Sperimentale dell'Abruzzo e Molise "G. Caporale"                                                                                       | Mencacci A, Camilloni B, Lorusso A, Marccacci M, Di Domenico M, Ancora M, Curini V, Mangone I, Rinaldi A, Scialabba S, Di Pasquale A, Cammà C, Puglia I, Calistri P, Savini G                                                                                                                                                                                                                                                                                                                                                                                                                   |
| EPI_ISL_1322021                                                                                                                                                                                                                                               |                                                               | Lab voor klinische biologie                                           | Lab voor klinische biologie                                                                                                                                     | Marija Janevska, Hannelore Hamerlinck, Bruno Verhasselt                                                                                                                                                                                                                                                                                                                                                                                                                                                                                                                                         |
| EPI_ISL_1322682, EPI_ISL_1322684, EPI_ISL_1322685, EPI_ISL_1322686, EPI_ISL_1322687, EPI_ISL_1322688, EPI_ISL_1322689                                                                                                                                         |                                                               | KU Leuven, Rega Institute, Clinical and Epidemiological Virology      | KU Leuven, Rega Institute, Clinical and Epidemiological Virology                                                                                                | Tony Wawina-Bokalanga, Bert Vanmechelen, Joan Marti-Carerras, Piet Maes                                                                                                                                                                                                                                                                                                                                                                                                                                                                                                                         |
| EPI_ISL_1323769                                                                                                                                                                                                                                               |                                                               | National Virus Reference Laboratory                                   | National Virus Reference Laboratory                                                                                                                             | Zoe Yandle, Charlene Bennett, Gabriel Gonzalez, Michael Carr, Jonathan Dean, Cillian F De Gascun                                                                                                                                                                                                                                                                                                                                                                                                                                                                                                |
| EPI_ISL_1327150, EPI_ISL_1327174, EPI_ISL_1327496, EPI_ISL_1327504, EPI_ISL_1327564, EPI_ISL_1327636, EPI_ISL_1327671, EPI_ISL_1329244, EPI_ISL_1329280, EPI_ISL_1332711                                                                                      |                                                               | Lighthouse Lab in Cambridge                                           | Wellcome Sanger Institute for the COVID-19 Genomics UK (COG-UK) Consortium                                                                                      | Rob Howes, The Lighthouse Lab in Cambridge and Alex Alderton, Roberto Amato, Jeffrey Barrett, Sonia Goncalves, Ewan Harrison, David K. Jackson, Ian Johnston, Dominic Kwiatkowski, Cordelia Langford, John Sillitoe on behalf of the Wellcome Sanger Institute COVID-19 Surveillance Team                                                                                                                                                                                                                                                                                                       |
| EPI_ISL_1332747                                                                                                                                                                                                                                               |                                                               | Lighthouse Lab in Glasgow                                             | Wellcome Sanger Institute for the COVID-19 Genomics UK (COG-UK) Consortium                                                                                      | Harper VanSteenhouse, Yumi Kasai, David Gray, Carol Clugston, Anna Dominiczak and Alex Alderton, Roberto Amato, Jeffrey Barrett, Sonia Goncalves, Ewan Harrison, David K. Jackson, Ian Johnston, Dominic Kwiatkowski, Cordelia Langford, John Sillitoe on behalf of the Wellcome Sanger Institute COVID-19 Surveillance Team                                                                                                                                                                                                                                                                    |
| EPI_ISL_1336178                                                                                                                                                                                                                                               |                                                               | Azienda Ospedaliera Terni                                             | Istituto Zooprofilattico Sperimentale dell'Abruzzo e Molise "G. Caporale"                                                                                       | Palumbo M, Scaccetti A, Lorusso A, Marccacci M, Di Domenico M, Ancora M, Curini V, Mangone I, Rinaldi A, Scialabba S, Di Pasquale A, Cammà C, Puglia I, Calistri P, Savini G                                                                                                                                                                                                                                                                                                                                                                                                                    |
| EPI_ISL_1336264                                                                                                                                                                                                                                               |                                                               | ALGEMEEN MEDISCH LABO                                                 | UAntwerp, Laboratory of Medical Microbiology                                                                                                                    | Basil Britto Xavier, Jasmine Coppens, Marie Le Mercier, Christine Lammens, Veerle Matheussen, Herman Goossens                                                                                                                                                                                                                                                                                                                                                                                                                                                                                   |
| EPI_ISL_1336265, EPI_ISL_1336269                                                                                                                                                                                                                              |                                                               | Platform BIS UZA/UAntwerpen                                           | UAntwerp, Laboratory of Medical Microbiology                                                                                                                    | Basil Britto Xavier, Jasmine Coppens, Marie Le Mercier, Christine Lammens, Veerle Matheussen, Herman Goossens                                                                                                                                                                                                                                                                                                                                                                                                                                                                                   |
| EPI_ISL_1336800, EPI_ISL_1336808, EPI_ISL_1336810, EPI_ISL_1336831, EPI_ISL_1336833, EPI_ISL_1336834, EPI_ISL_1336849                                                                                                                                         |                                                               | Azienda Ospedaliera Terni                                             | Istituto Zooprofilattico Sperimentale dell'Abruzzo e Molise "G. Caporale"                                                                                       | Palumbo M, Scaccetti A, Lorusso A, Marccacci M, Di Domenico M, Ancora M, Curini V, Mangone I, Rinaldi A, Scialabba S, Caporale M, Di Pasquale A, Cammà C, Puglia I, Calistri P, Savini G                                                                                                                                                                                                                                                                                                                                                                                                        |
| EPI_ISL_1336863                                                                                                                                                                                                                                               |                                                               | Laboratorio Analisi Osp. Città di Castello - Azienda USL Umbria1      | Istituto Zooprofilattico Sperimentale dell'Abruzzo e Molise "G. Caporale"                                                                                       | Malagigi V, Tacconi P, Lorusso A, Marccacci M, Di Domenico M, Ancora M, Curini V, Mangone I, Rinaldi A, Scialabba S, Caporale M, Di Pasquale A, Cammà C, Puglia I, Calistri P, Savini G                                                                                                                                                                                                                                                                                                                                                                                                         |
| EPI_ISL_1336864                                                                                                                                                                                                                                               |                                                               | Laboratorio Analisi Osp. Città di Castello - Azienda USL Umbria2      | Istituto Zooprofilattico Sperimentale dell'Abruzzo e Molise "G. Caporale"                                                                                       | Malagigi V, Tacconi P, Lorusso A, Marccacci M, Di Domenico M, Ancora M, Curini V, Mangone I, Rinaldi A, Scialabba S, Caporale M, Di Pasquale A, Cammà C, Puglia I, Calistri P, Savini G                                                                                                                                                                                                                                                                                                                                                                                                         |
| EPI_ISL_1336865                                                                                                                                                                                                                                               |                                                               | Laboratorio Analisi Osp. Città di Castello - Azienda USL Umbria3      | Istituto Zooprofilattico Sperimentale dell'Abruzzo e Molise "G. Caporale"                                                                                       | Malagigi V, Tacconi P, Lorusso A, Marccacci M, Di Domenico M, Ancora M, Curini V, Mangone I, Rinaldi A, Scialabba S, Caporale M, Di Pasquale A, Cammà C, Puglia I, Calistri P, Savini G                                                                                                                                                                                                                                                                                                                                                                                                         |
| EPI_ISL_1336866                                                                                                                                                                                                                                               |                                                               | Laboratorio Analisi Osp. Città di Castello - Azienda USL Umbria4      | Istituto Zooprofilattico Sperimentale dell'Abruzzo e Molise "G. Caporale"                                                                                       | Malagigi V, Tacconi P, Lorusso A, Marccacci M, Di Domenico M, Ancora M, Curini V, Mangone I, Rinaldi A, Scialabba S, Caporale M, Di Pasquale A, Cammà C, Puglia I, Calistri P, Savini G                                                                                                                                                                                                                                                                                                                                                                                                         |
| EPI_ISL_1336867                                                                                                                                                                                                                                               |                                                               | Laboratorio Analisi Osp. Città di Castello - Azienda USL Umbria5      | Istituto Zooprofilattico Sperimentale dell'Abruzzo e Molise "G. Caporale"                                                                                       | Malagigi V, Tacconi P, Lorusso A, Marccacci M, Di Domenico M, Ancora M, Curini V, Mangone I, Rinaldi A, Scialabba S, Caporale M, Di Pasquale A, Cammà C, Puglia I, Calistri P, Savini G                                                                                                                                                                                                                                                                                                                                                                                                         |
| EPI_ISL_1336868                                                                                                                                                                                                                                               |                                                               | Laboratorio Analisi Osp. Città di Castello - Azienda USL Umbria6      | Istituto Zooprofilattico Sperimentale dell'Abruzzo e Molise "G. Caporale"                                                                                       | Malagigi V, Tacconi P, Lorusso A, Marccacci M, Di Domenico M, Ancora M, Curini V, Mangone I, Rinaldi A, Scialabba S, Caporale M, Di Pasquale A, Cammà C, Puglia I, Calistri P, Savini G                                                                                                                                                                                                                                                                                                                                                                                                         |
| EPI_ISL_1336869                                                                                                                                                                                                                                               |                                                               | Laboratorio Analisi Osp. Città di Castello - Azienda USL Umbria7      | Istituto Zooprofilattico Sperimentale dell'Abruzzo e Molise "G. Caporale"                                                                                       | Malagigi V, Tacconi P, Lorusso A, Marccacci M, Di Domenico M, Ancora M, Curini V, Mangone I, Rinaldi A, Scialabba S, Caporale M, Di Pasquale A, Cammà C, Puglia I, Calistri P, Savini G                                                                                                                                                                                                                                                                                                                                                                                                         |
| EPI_ISL_1336870                                                                                                                                                                                                                                               |                                                               | Laboratorio Analisi Osp. Città di Castello - Azienda USL Umbria8      | Istituto Zooprofilattico Sperimentale dell'Abruzzo e Molise "G. Caporale"                                                                                       | Malagigi V, Tacconi P, Lorusso A, Marccacci M, Di Domenico M, Ancora M, Curini V, Mangone I, Rinaldi A, Scialabba S, Caporale M, Di Pasquale A, Cammà C, Puglia I, Calistri P, Savini G                                                                                                                                                                                                                                                                                                                                                                                                         |
| EPI_ISL_1336872                                                                                                                                                                                                                                               |                                                               | Università degli Studi di Perugia                                     | Istituto Zooprofilattico Sperimentale dell'Abruzzo e Molise "G. Caporale"                                                                                       | Mencacci A, Camilloni B, Lorusso A, Marccacci M, Di Domenico M, Ancora M, Curini V, Mangone I, Rinaldi A, Scialabba S, Caporale M, Di Pasquale A, Cammà C, Puglia I, Calistri P, Savini G                                                                                                                                                                                                                                                                                                                                                                                                       |
| EPI_ISL_1336873                                                                                                                                                                                                                                               |                                                               | Istituto Zooprofilattico Sperimentale Umbria e Marche "Togo Rosati"   | Istituto Zooprofilattico Sperimentale dell'Abruzzo e Molise "G. Caporale"                                                                                       | Biagetti M, Giammarioli M, Lorusso A, Marccacci M, Di Domenico M, Ancora M, Curini V, Mangone I, Rinaldi A, Scialabba S, Caporale M, Di Pasquale A, Cammà C, Puglia I, Calistri P, Savini G                                                                                                                                                                                                                                                                                                                                                                                                     |
| EPI_ISL_1336874, EPI_ISL_1336876, EPI_ISL_1336877                                                                                                                                                                                                             |                                                               | Università degli Studi di Perugia                                     | Istituto Zooprofilattico Sperimentale dell'Abruzzo e Molise "G. Caporale"                                                                                       | Mencacci A, Camilloni B, Lorusso A, Marccacci M, Di Domenico M, Ancora M, Curini V, Mangone I, Rinaldi A, Scialabba S, Caporale M, Di Pasquale A, Cammà C, Puglia I, Calistri P, Savini G                                                                                                                                                                                                                                                                                                                                                                                                       |
| EPI_ISL_1337127, EPI_ISL_1337128, EPI_ISL_1337165, EPI_ISL_1337196, EPI_ISL_1337333, EPI_ISL_1337346, EPI_ISL_1337348                                                                                                                                         |                                                               | Helix/Illumina                                                        | Centers for Disease Control and Prevention Division of Viral Diseases, Pathogen Discovery                                                                       | Peter W. Cook, Dakota Howard, Dhvani Batra, Ben L. Rambo-Martin, Eileen de Feo, Jan Antico, Christine Tran, Matthew Tolentino, Shannon Wickline, Kim Gietzen, Brad Sickler, Jingtao Liu, Eric Allen, Phil Febbo, Summer Galloway, Nicole L. Washington, Simon White, Geraint Levan, Kelly Schiabor Barrett, Elizabeth Cirulli, Alexandre Bolze, Ary Ascencio, Charlotte Rivera-Garcia, Ryan Cho, Jason Nguyen, Sherry Wang, Jimmy Ramirez, Tyler Cassens, Efrén Sandoval, Magnus Isaksson, William Lee, David Becker, Marc Laurent, James Lu, Clinton R. Paden, Suxiang Tong, Duncan MacCannell |
| EPI_ISL_1337455                                                                                                                                                                                                                                               |                                                               | Platform BIS UZA/UAntwerpen                                           | UAntwerp, Laboratory of Medical Microbiology                                                                                                                    | Basil Britto Xavier, Jasmine Coppens, Marie Le Mercier, Christine Lammens, Veerle Matheussen, Herman Goossens                                                                                                                                                                                                                                                                                                                                                                                                                                                                                   |
| EPI_ISL_1340837, EPI_ISL_1340838, EPI_ISL_1340849, EPI_ISL_1340856                                                                                                                                                                                            |                                                               | Northwestern Memorial Hospital                                        | Northwestern University - Ozer Lab                                                                                                                              | Ramon Lorenzo-Redondo, Lacy M. Simons, Taylor J. Dean, Chad J. Achenbach, Lawrence J. Jennings, Chao Qi, Michael G. Ison, Judd F. Hultquist, Egon A. Ozer                                                                                                                                                                                                                                                                                                                                                                                                                                       |
| EPI_ISL_1341741                                                                                                                                                                                                                                               |                                                               | UW Virology Lab                                                       | UW Virology Lab                                                                                                                                                 | Pavitra Roychoudhury, Hong Xie, Lasata Shrestha, Shah Mohamed Bakhsh, Michelle Lin, Noah R. Baker, Sean Ellis, Saraswathi Sathees, Meei-Li Huang, Keith R Jerome, Alexander Greninger                                                                                                                                                                                                                                                                                                                                                                                                           |
| EPI_ISL_1348076                                                                                                                                                                                                                                               |                                                               | SYNLAB MVZ Leinfelden-Echterdingen                                    | Robert Koch Institute                                                                                                                                           | unknown                                                                                                                                                                                                                                                                                                                                                                                                                                                                                                                                                                                         |
| EPI_ISL_1349052, EPI_ISL_1349066, EPI_ISL_1349073                                                                                                                                                                                                             |                                                               | Bayerisches Landesamt für Gesundheit und Lebensmittelsicherheit (LGL) | Robert Koch Institute                                                                                                                                           | unknown                                                                                                                                                                                                                                                                                                                                                                                                                                                                                                                                                                                         |
| EPI_ISL_1350502                                                                                                                                                                                                                                               |                                                               | Limbach - MVZ Humangenetik Ulm                                        | Robert Koch Institute                                                                                                                                           | unknown                                                                                                                                                                                                                                                                                                                                                                                                                                                                                                                                                                                         |
| EPI_ISL_1350795, EPI_ISL_1350914,                                                                                                                                                                                                                             |                                                               | Synlab MVZ Augsburg                                                   | Robert Koch Institute                                                                                                                                           | unknown                                                                                                                                                                                                                                                                                                                                                                                                                                                                                                                                                                                         |

|                                                                                                                                                                                                                                                                                                                                      |                                                                                            |                                                                                                                                              |                                                                                                                                                                                                                                                                                                                                                                    |
|--------------------------------------------------------------------------------------------------------------------------------------------------------------------------------------------------------------------------------------------------------------------------------------------------------------------------------------|--------------------------------------------------------------------------------------------|----------------------------------------------------------------------------------------------------------------------------------------------|--------------------------------------------------------------------------------------------------------------------------------------------------------------------------------------------------------------------------------------------------------------------------------------------------------------------------------------------------------------------|
| EPI_ISL_1352872, EPI_ISL_1352910<br>EPI_ISL_1354017                                                                                                                                                                                                                                                                                  | Bioscientia Labor Wermsdorf                                                                | Robert Koch Institute                                                                                                                        | unknown                                                                                                                                                                                                                                                                                                                                                            |
| EPI_ISL_1357775, EPI_ISL_1357776<br>EPI_ISL_1358285                                                                                                                                                                                                                                                                                  | National Virus Reference Laboratory<br>Centro de Treinamento e Referencia DST AIDS         | National Virus Reference Laboratory<br>Instituto Adolfo Lutz, Interdisciplinary Procedures Center,<br>Strategic Laboratory                   | Fiona Crispie, Calum Walsh, Zoe Yandle, Charlene Bennet, Gabriel Gonzalez, Michael Carr, Jonathan Dean, Paul Cotter, Cillian F De Gascun<br>Claudio Tavares Sacchi, Claudia Regina Gonçalves, Erica Valessa Ramos Gomes, Karoline Rodrigues Campos, Caio Vinicius Dias Lopes                                                                                       |
| EPI_ISL_1358286                                                                                                                                                                                                                                                                                                                      | Hospital Municipal Josanias Castanha Braga                                                 | Instituto Adolfo Lutz, Interdisciplinary Procedures Center,<br>Strategic Laboratory                                                          | Claudio Tavares Sacchi, Claudia Regina Gonçalves, Erica Valessa Ramos Gomes, Karoline Rodrigues Campos, Caio Vinicius Dias Lopes                                                                                                                                                                                                                                   |
| EPI_ISL_1358287                                                                                                                                                                                                                                                                                                                      | Hospital Nipo Brasileiro                                                                   | Instituto Adolfo Lutz, Interdisciplinary Procedures Center,<br>Strategic Laboratory                                                          | Claudio Tavares Sacchi, Claudia Regina Gonçalves, Erica Valessa Ramos Gomes, Karoline Rodrigues Campos, Caio Vinicius Dias Lopes                                                                                                                                                                                                                                   |
| EPI_ISL_1358288, EPI_ISL_1358289,<br>EPI_ISL_1358290                                                                                                                                                                                                                                                                                 | IAL Regional de Aracatuba                                                                  | Instituto Adolfo Lutz, Interdisciplinary Procedures Center,<br>Strategic Laboratory                                                          | Claudio Tavares Sacchi, Claudia Regina Gonçalves, Erica Valessa Ramos Gomes, Karoline Rodrigues Campos, Caio Vinicius Dias Lopes                                                                                                                                                                                                                                   |
| EPI_ISL_1358292, EPI_ISL_1358293                                                                                                                                                                                                                                                                                                     | IAL Regional de Santo Andre                                                                | Instituto Adolfo Lutz, Interdisciplinary Procedures Center,<br>Strategic Laboratory                                                          | Claudio Tavares Sacchi, Claudia Regina Gonçalves, Erica Valessa Ramos Gomes, Karoline Rodrigues Campos, Caio Vinicius Dias Lopes                                                                                                                                                                                                                                   |
| EPI_ISL_1358300, EPI_ISL_1358301                                                                                                                                                                                                                                                                                                     | Lacen de Tocantins                                                                         | Instituto Adolfo Lutz, Interdisciplinary Procedures Center,<br>Strategic Laboratory                                                          | Claudio Tavares Sacchi, Claudia Regina Gonçalves, Erica Valessa Ramos Gomes, Karoline Rodrigues Campos, Caio Vinicius Dias Lopes                                                                                                                                                                                                                                   |
| EPI_ISL_1358304                                                                                                                                                                                                                                                                                                                      | LACEN do Mato Grosso do Sul                                                                | Instituto Adolfo Lutz, Interdisciplinary Procedures Center,<br>Strategic Laboratory                                                          | Claudio Tavares Sacchi, Claudia Regina Gonçalves, Erica Valessa Ramos Gomes, Karoline Rodrigues Campos, Caio Vinicius Dias Lopes                                                                                                                                                                                                                                   |
| EPI_ISL_1358318, EPI_ISL_1358319,<br>EPI_ISL_1358320, EPI_ISL_1358321                                                                                                                                                                                                                                                                | UPA Vila Santa Catarina                                                                    | Instituto Adolfo Lutz, Interdisciplinary Procedures Center,<br>Strategic Laboratory                                                          | Claudio Tavares Sacchi, Claudia Regina Gonçalves, Erica Valessa Ramos Gomes, Karoline Rodrigues Campos, Caio Vinicius Dias Lopes                                                                                                                                                                                                                                   |
| EPI_ISL_1358351, EPI_ISL_1358352<br>EPI_ISL_1359892                                                                                                                                                                                                                                                                                  | Ministry of Health Turkey<br>BIOLAC - SIEGE                                                | Ministry of Health Turkey<br>CNR Virus des Infections Respiratoires - France SUD                                                             | Fatma Bayrakdar, Yaserin Cogun, Süleyman Yalcin, Gülay Korukluolu<br>Antonin Bal, Gregory Destras, Gwendolyne Burfin, Hadrien Regue, Quentin Semanas, Martine Valette, Bruno Lina, Laurence Josset                                                                                                                                                                 |
| EPI_ISL_1360098, EPI_ISL_1360099                                                                                                                                                                                                                                                                                                     | SYNLAB                                                                                     | GIGA Medical Genomics                                                                                                                        | Keith Durkin, Maria Artesi, Sébastien Bontems, Raphaël Boreux, Bouchra Boujemla, Nathalie Renotte, Cécile Meex, Pierrette Melin, Marie-Pierre Hayette, Vincent Bours                                                                                                                                                                                               |
| EPI_ISL_1361446                                                                                                                                                                                                                                                                                                                      | Viollier AG                                                                                | Department of Biosystems Science and Engineering, ETH<br>Zürich                                                                              | Christian Beisel, Sarah Nadeau, Chaoran Chen, Ivan Topolsky, Philipp Jablonski, Lara Fuhrmann, David Drefuss, Katharina Jahn, Rebecca Denes, Mirjam Feldkamp, Ina Nissen, Natascha Santacroce, Elodie Burcklen, Christiane Beckmann, Maurice Redondo, Olivier Kobel, Christoph Noppen, Sophie Seidel, Noemie Santamaria de Souza, Niko Beerenwinkel, Tanja Stadler |
| EPI_ISL_1364274, EPI_ISL_1364318,<br>EPI_ISL_1364406                                                                                                                                                                                                                                                                                 | Swedish national genomic surveillance program of<br>SARS-CoV-2                             | The Public Health Agency of Sweden                                                                                                           | Swedish national genomic surveillance program of SARS-CoV-2                                                                                                                                                                                                                                                                                                        |
| EPI_ISL_1364902                                                                                                                                                                                                                                                                                                                      | Bundeswehrzentral Krankenhaus Koblenz                                                      | Bundeswehr Institute of Microbiology                                                                                                         | Markus Antwerpen, Alexandra Rehn, Mathias Walter, Malena Bestehorn-Willmann, Mike Pillukat, Sabine Zange, Enrico Georgi, Roman Wölfel                                                                                                                                                                                                                              |
| EPI_ISL_1365182                                                                                                                                                                                                                                                                                                                      | Lighthouse Lab in Cambridge                                                                | Wellcome Sanger Institute for the COVID-19 Genomics UK<br>(COG-UK) Consortium                                                                | Rob Howes, The Lighthouse Lab in Cambridge and Alex Alderton, Roberto Amato, Jeffrey Barrett, Sonia Goncalves, Ewan Harrison, David K. Jackson, Ian Johnston, Dominic Kwiatkowski, Cordelia Langford, John Sillitoe on behalf of the Wellcome Sanger Institute COVID-19 Surveillance Team                                                                          |
| EPI_ISL_1365746                                                                                                                                                                                                                                                                                                                      | Laboratorio di Riferimento Regionale della Sicilia Occidentale<br>per l'Emergenza COVID-19 | Laboratorio di Riferimento Regionale della Sicilia Occidentale<br>per l'Emergenza COVID-19                                                   | Fabio Tramuto, Carmelo Massimo Maida, Daniela Di Naro, Giulia Randazzo, Walter Mazzucco, Giorgio Graziano, Vincenzo Restivo, Claudio Costantino, Francesco Vitale                                                                                                                                                                                                  |
| EPI_ISL_1365747                                                                                                                                                                                                                                                                                                                      | Associação Fundo de Incentivo a Pesquisa                                                   | Associação Fundo de Incentivo a Pesquisa                                                                                                     | Priscila Farias Tempaku, Juliana Nogueira Martins Rodrigues, Erika Rodrigues de Oliveira, Soraya Sgambatti de Andrade, Debora Ribeiro Ramadan, Sergio Tufik                                                                                                                                                                                                        |
| EPI_ISL_1366655                                                                                                                                                                                                                                                                                                                      | Usansolo-Galdakao University Hospital                                                      | Cruces University Hospital                                                                                                                   | Ana Gual-de-Torrella, Izaskun Alejo-Cancho, mikel Gallego; Ana Belén de la Hoz                                                                                                                                                                                                                                                                                     |
| EPI_ISL_1366657                                                                                                                                                                                                                                                                                                                      | Usansolo-Galdakao University Hospital                                                      | Cruces University Hospital                                                                                                                   | Ana Gual-de-Torrella, Izaskun Alejo-Cancho, Mikel Gallego, Ana Belén de la OZ                                                                                                                                                                                                                                                                                      |
| EPI_ISL_1369135                                                                                                                                                                                                                                                                                                                      | Lab voor klinische biologie                                                                | Lab voor klinische biologie                                                                                                                  | Marija Janevska, Hannelore Hamerlinck, Bruno Verhasselt                                                                                                                                                                                                                                                                                                            |
| EPI_ISL_1369506, EPI_ISL_1369512,<br>EPI_ISL_1369531, EPI_ISL_1369541                                                                                                                                                                                                                                                                | University Hospitals of Geneva, Laboratory of Virology                                     | HUG, Laboratory of Virology and the Health2030 Genome<br>Center                                                                              | Samuel Cordey, Ana Rita Goncalves, Laurent Kaiser, Lorenzo Cerutti, Henri Pageot, Melyssa Elies, Deborah Penet, Keith Harshman, Ioannis Xenarios, Emmanouil Dermitzakis                                                                                                                                                                                            |
| EPI_ISL_1370399                                                                                                                                                                                                                                                                                                                      | VIDYMED EPALINGES                                                                          | Laboratory of genomics and metagenomics, Institute of<br>Microbiology, University Hospital Centre and University of<br>Lausanne, Switzerland | Trestan Pillonel, Damien Jacot, Sébastien Aeby, Gilbert Greub, Claire Bertelli                                                                                                                                                                                                                                                                                     |
| EPI_ISL_1370577, EPI_ISL_1370615, EPI_ISL_1370834, EPI_ISL_1370893, EPI_ISL_1370903, EPI_ISL_1371081,<br>see above                                                                                                                                                                                                                   | Dutch COVID-19 response team                                                               | National Institute for Public Health and the Environment<br>(RIVM)                                                                           | Adam Meijer, Harry Vennema, Dirk Eggink, Jeroen Cremer, Sharon van den Brink, Bas van der Veer, AnneMarie van den Brandt, Florian Zwagemaker, Dennis Schmitz, Chantal Reusken, on behalf of the national COVID-19 response team                                                                                                                                    |
| EPI_ISL_1371772, EPI_ISL_1371773<br>EPI_ISL_1372185                                                                                                                                                                                                                                                                                  | MIRIALIS CLUSES BECHET<br>Cliniques universitaires Saint-Luc                               | CNR Virus des Infections Respiratoires - France SUD<br>UCLouvain/IREC/MBLG                                                                   | Antonin Bal, Gregory Destras, Gwendolyne Burfin, Hadrien Regue, Quentin Semanas, Martine Valette, Bruno Lina, Laurence Josset<br>Jean Ruelle, Lysa Pinsmaye, Eleonore Ngyuvula Mantu, Benoit Kabamba Mukadi                                                                                                                                                        |
| EPI_ISL_1372420, EPI_ISL_1372421,<br>EPI_ISL_1372422                                                                                                                                                                                                                                                                                 | OLVZ Aalst                                                                                 | OLVZ Aalst                                                                                                                                   | Astrid Holderbeke                                                                                                                                                                                                                                                                                                                                                  |
| EPI_ISL_1372646                                                                                                                                                                                                                                                                                                                      | Maine Health and Environmental Testing Laboratory                                          | Tewhey Lab, The Jackson Laboratory                                                                                                           | Matluk,N., Dewey,H., Iosue,F., Barter,M., Lynch,R., Munger,H. and Tewhey,R.                                                                                                                                                                                                                                                                                        |
| EPI_ISL_1373447, EPI_ISL_1373457                                                                                                                                                                                                                                                                                                     | UNC-CH COVID Surveillance Lab                                                              | Jeremy Wang                                                                                                                                  | Jeremy Wang, Alexander Rubinsteyn, Melissa Miller, Corbin Jones, Amy James Loftis, Amir Barzin, Susan Fiscus                                                                                                                                                                                                                                                       |
| EPI_ISL_1374108                                                                                                                                                                                                                                                                                                                      | Lighthouse Lab in Cambridge                                                                | Wellcome Sanger Institute for the COVID-19 Genomics UK<br>(COG-UK) Consortium                                                                | Rob Howes, The Lighthouse Lab in Cambridge and Alex Alderton, Roberto Amato, Jeffrey Barrett, Sonia Goncalves, Ewan Harrison, David K. Jackson, Ian Johnston, Dominic Kwiatkowski, Cordelia Langford, John Sillitoe on behalf of the Wellcome Sanger Institute COVID-19 Surveillance Team                                                                          |
| EPI_ISL_1374280                                                                                                                                                                                                                                                                                                                      | Randex Laboratories                                                                        | Wellcome Sanger Institute for the COVID-19 Genomics UK<br>(COG-UK) Consortium                                                                | Randex Laboratories and Alex Alderton, Roberto Amato, Jeffrey Barrett, Sonia Goncalves, Ewan Harrison, David K. Jackson, Ian Johnston, Dominic Kwiatkowski, Cordelia Langford, John Sillitoe on behalf of the Wellcome Sanger Institute COVID-19 Surveillance Team                                                                                                 |
| EPI_ISL_1377092, EPI_ISL_1377095                                                                                                                                                                                                                                                                                                     | Lighthouse Lab in Cambridge                                                                | Wellcome Sanger Institute for the COVID-19 Genomics UK<br>(COG-UK) Consortium                                                                | Rob Howes, The Lighthouse Lab in Cambridge and Alex Alderton, Roberto Amato, Jeffrey Barrett, Sonia Goncalves, Ewan Harrison, David K. Jackson, Ian Johnston, Dominic Kwiatkowski, Cordelia Langford, John Sillitoe on behalf of the Wellcome Sanger Institute COVID-19 Surveillance Team                                                                          |
| EPI_ISL_1378750                                                                                                                                                                                                                                                                                                                      | Yale Clinical Virology Lab                                                                 | Grubaugh Lab - Yale School of Public Health                                                                                                  | Joseph Fauver, Mallery Breban, Isabell Ott, Tara Alpert, Mary Petrone, Anderson Brito, Chantal Vogels, Annie Watkins, Chaney Kalinich, Jessica Rothman, Marie L. Landry, Nathan Grubaugh                                                                                                                                                                           |
| EPI_ISL_1380667, EPI_ISL_1380742, EPI_ISL_1380774, EPI_ISL_1380807, EPI_ISL_1380809, EPI_ISL_1380839, EPI_ISL_1380845, EPI_ISL_1380872, EPI_ISL_1380874, EPI_ISL_1380909, EPI_ISL_1380910, EPI_ISL_1380932, EPI_ISL_1380981, EPI_ISL_1380988, EPI_ISL_1380992, EPI_ISL_1381007, EPI_ISL_1381022,<br>EPI_ISL_1381035, EPI_ISL_1381036 | see above                                                                                  | KU Leuven, Rega Institute, Clinical and Epidemiological<br>Virology                                                                          | Tony Wawina-Bokalanga, Bert Vanmechelen, Joan Marti-Carerras, Piet Maes                                                                                                                                                                                                                                                                                            |
| EPI_ISL_1381045, EPI_ISL_1381047, EPI_ISL_1381048, EPI_ISL_1381050, EPI_ISL_1381052, EPI_ISL_1381055, EPI_ISL_1381056, EPI_ISL_1381057, EPI_ISL_1381059, EPI_ISL_1381060, EPI_ISL_1381061, EPI_ISL_1381062, EPI_ISL_1381063, EPI_ISL_1381065<br>see above                                                                            | IAL Regional de Santo Andre                                                                | Instituto Adolfo Lutz, Interdisciplinary Procedures Center,<br>Strategic Laboratory                                                          | Claudio Tavares Sacchi, Claudia Regina Gonçalves, Erica Valessa Ramos Gomes, Karoline Rodrigues Campos, Caio Vinicius Dias Lopes                                                                                                                                                                                                                                   |
| EPI_ISL_1381068                                                                                                                                                                                                                                                                                                                      | Conjunto Hospitalar do Mandaqui de Sao Paulo                                               | Instituto Adolfo Lutz, Interdisciplinary Procedures Center,                                                                                  | Claudio Tavares Sacchi, Claudia Regina Gonçalves, Erica Valessa Ramos Gomes, Karoline Rodrigues Campos, Caio Vinicius Dias Lopes                                                                                                                                                                                                                                   |

|                                                                                                                                                                                                                                                                                                                                                                                                                                                                                                                                                                                                                                                                                                                                                           |                                                                                                                |                                                                                                                |                                                                                                                                                                                                                                                                                                                           |
|-----------------------------------------------------------------------------------------------------------------------------------------------------------------------------------------------------------------------------------------------------------------------------------------------------------------------------------------------------------------------------------------------------------------------------------------------------------------------------------------------------------------------------------------------------------------------------------------------------------------------------------------------------------------------------------------------------------------------------------------------------------|----------------------------------------------------------------------------------------------------------------|----------------------------------------------------------------------------------------------------------------|---------------------------------------------------------------------------------------------------------------------------------------------------------------------------------------------------------------------------------------------------------------------------------------------------------------------------|
|                                                                                                                                                                                                                                                                                                                                                                                                                                                                                                                                                                                                                                                                                                                                                           |                                                                                                                | Strategic Laboratory                                                                                           |                                                                                                                                                                                                                                                                                                                           |
| EPI_ISL_1381069                                                                                                                                                                                                                                                                                                                                                                                                                                                                                                                                                                                                                                                                                                                                           | Hospital Heliopolis                                                                                            | Instituto Adolfo Lutz, Interdisciplinary Procedures Center, Strategic Laboratory                               | Claudio Tavares Sacchi, Claudia Regina Gonçalves, Erica Valessa Ramos Gomes, Karoline Rodrigues Campos, Caio Vinicius Dias Lopes                                                                                                                                                                                          |
| EPI_ISL_1381070, EPI_ISL_1381071                                                                                                                                                                                                                                                                                                                                                                                                                                                                                                                                                                                                                                                                                                                          | Hospital Municipal Cidade Tiradentes Carmem Prudente                                                           | Instituto Adolfo Lutz, Interdisciplinary Procedures Center, Strategic Laboratory                               | Claudio Tavares Sacchi, Claudia Regina Gonçalves, Erica Valessa Ramos Gomes, Karoline Rodrigues Campos, Caio Vinicius Dias Lopes                                                                                                                                                                                          |
| EPI_ISL_1381213                                                                                                                                                                                                                                                                                                                                                                                                                                                                                                                                                                                                                                                                                                                                           | Hospital                                                                                                       | National Reference Center for Viruses of Respiratory Infections, Institut Pasteur, Paris                       | Marion Barbet, Sylvie Behillil, Méline Bizard, Angela Brisebarre, Camille Capel, Louise Lefrançois, Etienne Simon-Lorière, Vincent Enouf, Maud Vanpeene, Sylvie van der Werf, Louvet Laurence                                                                                                                             |
| EPI_ISL_1381214                                                                                                                                                                                                                                                                                                                                                                                                                                                                                                                                                                                                                                                                                                                                           | Sentinelles Paris                                                                                              | National Reference Center for Viruses of Respiratory Infections, Institut Pasteur, Paris                       | Marion Barbet, Sylvie Behillil, Méline Bizard, Angela Brisebarre, Camille Capel, Louise Lefrançois, Etienne Simon-Lorière, Vincent Enouf, Maud Vanpeene, Sylvie van der Werf, Rousset Dominique                                                                                                                           |
| EPI_ISL_1381216, EPI_ISL_1381217                                                                                                                                                                                                                                                                                                                                                                                                                                                                                                                                                                                                                                                                                                                          | Hospital                                                                                                       | National Reference Center for Viruses of Respiratory Infections, Institut Pasteur, Paris                       | Marion Barbet, Sylvie Behillil, Méline Bizard, Angela Brisebarre, Camille Capel, Louise Lefrançois, Etienne Simon-Lorière, Vincent Enouf, Maud Vanpeene, Sylvie van der Werf, Rousset Dominique                                                                                                                           |
| EPI_ISL_1381222                                                                                                                                                                                                                                                                                                                                                                                                                                                                                                                                                                                                                                                                                                                                           | Labo Analyses Med                                                                                              | National Reference Center for Viruses of Respiratory Infections, Institut Pasteur, Paris                       | Marion Barbet, Sylvie Behillil, Méline Bizard, Angela Brisebarre, Camille Capel, Louise Lefrançois, Etienne Simon-Lorière, Vincent Enouf, Maud Vanpeene, Sylvie van der Werf, Rousset Dominique                                                                                                                           |
| EPI_ISL_1381872                                                                                                                                                                                                                                                                                                                                                                                                                                                                                                                                                                                                                                                                                                                                           | Hospital General Universitario Gregorio Marañón                                                                | Hospital General Universitario Gregorio Marañón                                                                | Sergio Buenestado Serrano, Pedro Sola Campoy, Laura Pérez-Lago, Cristina Rodríguez-Grande, Pilar Catalán, Patricia Muñoz, Darío García de Viedma                                                                                                                                                                          |
| EPI_ISL_1382059, EPI_ISL_1382060, EPI_ISL_1382061                                                                                                                                                                                                                                                                                                                                                                                                                                                                                                                                                                                                                                                                                                         | SYNLAB                                                                                                         | GIGA Medical Genomics                                                                                          | Keith Durkin, Maria Artesi, Sébastien Bontems, Raphaël Boreux, Bouchra Boujemla, Nathalie Renotte, Cécile Meex, Pierrette Melin, Marie-Pierre Hayette, Vincent Bours                                                                                                                                                      |
| EPI_ISL_1382062                                                                                                                                                                                                                                                                                                                                                                                                                                                                                                                                                                                                                                                                                                                                           | Department of Clinical Microbiology                                                                            | GIGA Medical Genomics                                                                                          | Keith Durkin, Maria Artesi, Sébastien Bontems, Raphaël Boreux, Bouchra Boujemla, Nathalie Renotte, Cécile Meex, Pierrette Melin, Marie-Pierre Hayette, Vincent Bours                                                                                                                                                      |
| EPI_ISL_1382063, EPI_ISL_1382064                                                                                                                                                                                                                                                                                                                                                                                                                                                                                                                                                                                                                                                                                                                          | SYNLAB                                                                                                         | GIGA Medical Genomics                                                                                          | Keith Durkin, Maria Artesi, Sébastien Bontems, Raphaël Boreux, Bouchra Boujemla, Nathalie Renotte, Cécile Meex, Pierrette Melin, Marie-Pierre Hayette, Vincent Bours                                                                                                                                                      |
| EPI_ISL_1382151, EPI_ISL_1382203, EPI_ISL_1382204, EPI_ISL_1382205, EPI_ISL_1382211, EPI_ISL_1382212, EPI_ISL_1382215, EPI_ISL_1382266, EPI_ISL_1382288, EPI_ISL_1382289, EPI_ISL_1382293, EPI_ISL_1382312, EPI_ISL_1382314, EPI_ISL_1382316, EPI_ISL_1382319, EPI_ISL_1382326, EPI_ISL_1382391, EPI_ISL_1382426, EPI_ISL_1382468, EPI_ISL_1382510, EPI_ISL_1382630, EPI_ISL_1382681, EPI_ISL_1382682, EPI_ISL_1382683, EPI_ISL_1382684, EPI_ISL_1382685, EPI_ISL_1382688, EPI_ISL_1382689, EPI_ISL_1382702, EPI_ISL_1382709, EPI_ISL_1382714, EPI_ISL_1382721, EPI_ISL_1382739, EPI_ISL_1382740, EPI_ISL_1382753, EPI_ISL_1382756, EPI_ISL_1382767, EPI_ISL_1382787, EPI_ISL_1382788, EPI_ISL_1382809, EPI_ISL_1382818, EPI_ISL_1382821, EPI_ISL_1382828 |                                                                                                                |                                                                                                                |                                                                                                                                                                                                                                                                                                                           |
| see above                                                                                                                                                                                                                                                                                                                                                                                                                                                                                                                                                                                                                                                                                                                                                 | KU Leuven, Rega Institute, Clinical and Epidemiological Virology                                               | KU Leuven, Rega Institute, Clinical and Epidemiological Virology                                               | Tony Wawina-Bokalanga, Bert Vanmechelen, Joan Marti-Carreras, Piet Maes                                                                                                                                                                                                                                                   |
| EPI_ISL_1383410, EPI_ISL_1384156                                                                                                                                                                                                                                                                                                                                                                                                                                                                                                                                                                                                                                                                                                                          | Laboratoire national de sante, Microbiology, Virology                                                          | Laboratoire national de sante, Microbiology, Microbial Genomics Platform                                       | Anke Wienecke-Baldacchino, Catherine Ragimbeau, Jessica Tapp, Fatu Djabi, Lise Pignon, Raoul Salmon, Trung Nguyen Nguyen, Tamir Abdelrahman                                                                                                                                                                               |
| EPI_ISL_1384478                                                                                                                                                                                                                                                                                                                                                                                                                                                                                                                                                                                                                                                                                                                                           | Laboratoires d'analyses medicales - Ketterthill                                                                | Laboratoire national de sante, Microbiology, Microbial Genomics Platform                                       | Anke Wienecke-Baldacchino, Catherine Ragimbeau, Jessica Tapp, Fatu Djabi, Lise Pignon, Raoul Salmon, Serge Vedy, Caroline Scheiber, Tamir Abdelrahman                                                                                                                                                                     |
| EPI_ISL_1384919, EPI_ISL_1385487, EPI_ISL_1385576, EPI_ISL_1385656, EPI_ISL_1385740, EPI_ISL_1385758, EPI_ISL_1385771                                                                                                                                                                                                                                                                                                                                                                                                                                                                                                                                                                                                                                     | Pandemic Response Lab - NYC                                                                                    | Pandemic Response Lab, R&D                                                                                     | Henry Lee, Michael Hammerling, Melissa Hopkins, Cybill del Castillo, Shinyoung Clair Kang, William Ward, Pradeep Bugga, Sol Rey, Dylan Law, Haiping Hao, Jon Laurent                                                                                                                                                      |
| EPI_ISL_1385803                                                                                                                                                                                                                                                                                                                                                                                                                                                                                                                                                                                                                                                                                                                                           | Laboratorio Microbiologia P.O. Cardarelli                                                                      | Laboratorio Microbiologia P.O. Cardarelli                                                                      | Valentina Felice, Giovanna Niro, Scutellà Massimiliano                                                                                                                                                                                                                                                                    |
| EPI_ISL_1385805                                                                                                                                                                                                                                                                                                                                                                                                                                                                                                                                                                                                                                                                                                                                           | Laboratorio Microbiologia P.O. Cardarelli                                                                      | Laboratorio Microbiologia P.O. Cardarelli                                                                      | Valentina Felice, Giovanna Niro, Massimiliano Scutellà                                                                                                                                                                                                                                                                    |
| EPI_ISL_1389392                                                                                                                                                                                                                                                                                                                                                                                                                                                                                                                                                                                                                                                                                                                                           | AZDelta                                                                                                        | AZDelta                                                                                                        | Geert Martens; Dieter De Smet                                                                                                                                                                                                                                                                                             |
| EPI_ISL_1390539, EPI_ISL_1390547, EPI_ISL_1390716                                                                                                                                                                                                                                                                                                                                                                                                                                                                                                                                                                                                                                                                                                         | IZSM                                                                                                           | TIGEM                                                                                                          | Antonio Grimaldi, Patrizia Annunziata, Francesco Panariello, Biancamaria Pierri, Claudia Tiberio, Valentina Bouche, Chiara Colantuono, Maria Concetta Cuomo, Denise Di Concilio, Lucio Di Filippo, Anna Manfredi, Marcello Salvi, Antonio Limone Luigi Altipaldi, Pellegrino Cerino, Andrea Ballabio, Davide Cacchiarelli |
| EPI_ISL_1391241, EPI_ISL_1391245, EPI_ISL_1391246, EPI_ISL_1391247                                                                                                                                                                                                                                                                                                                                                                                                                                                                                                                                                                                                                                                                                        | DIP. PREV. AVEZZANO SERVIZIO DI IGIENE EPIDEMIOLOGIA E SANITA' PUBBLICA AVEZZANO(L'AQUILA)                     | Istituto Zooprofilattico Sperimentale dell'Abruzzo e Molise *G. Caporale*                                      | Lorusso A, Marcacci M, Di Domenico M, Ancora M, Curini V, Di Lollo Valeria, Mangone I, Rinaldi A, Delli Compagni E, Scialabba S, Caporale M, Di Pasquale A, Cammà C, Puglia I, Calistri P, Savini G                                                                                                                       |
| EPI_ISL_1391403                                                                                                                                                                                                                                                                                                                                                                                                                                                                                                                                                                                                                                                                                                                                           | DIP. PREV. AVEZZANO SERVIZIO DI IGIENE EPIDEMIOLOGIA E SANITA' PUBBLICA                                        | Istituto Zooprofilattico Sperimentale dell'Abruzzo e Molise *G. Caporale*                                      | Lorusso A, Marcacci M, Di Domenico M, Ancora M, Curini V, Di Lollo Valeria, Mangone I, Rinaldi A, Scialabba S, Caporale M, Di Pasquale A, Cammà C, Puglia I, Calistri P, Savini G                                                                                                                                         |
| EPI_ISL_1392679                                                                                                                                                                                                                                                                                                                                                                                                                                                                                                                                                                                                                                                                                                                                           | DIP. PREV. AVEZZANO SERVIZIO DI IGIENE EPIDEMIOLOGIA E SANITA' PUBBLICA AVEZZANO(L'AQUILA)                     | Istituto Zooprofilattico Sperimentale dell'Abruzzo e Molise *G. Caporale*                                      | Lorusso A, Marcacci M, Di Domenico M, Ancora M, Curini V, Di Lollo Valeria, Mangone I, Rinaldi A, Delli Compagni E, Scialabba S, Caporale M, Di Pasquale A, Cammà C, Puglia I, Calistri P, Savini G                                                                                                                       |
| EPI_ISL_1394738                                                                                                                                                                                                                                                                                                                                                                                                                                                                                                                                                                                                                                                                                                                                           | Laboratorio Analisi Osp. Città di Castello - Azienda USL Umbria1                                               | Istituto Zooprofilattico Sperimentale dell'Abruzzo e Molise *G. Caporale*                                      | Malagigi V, Tacconi P, Lorusso A, Marcacci M, Di Domenico M, Ancora M, Curini V, Di Lollo Valeria, Mangone I, Rinaldi A, Scialabba S, Caporale M, Di Pasquale A, Cammà C, Puglia I, Calistri P, Savini G                                                                                                                  |
| EPI_ISL_1394743                                                                                                                                                                                                                                                                                                                                                                                                                                                                                                                                                                                                                                                                                                                                           | Azienda USL Umbria 2                                                                                           | Istituto Zooprofilattico Sperimentale dell'Abruzzo e Molise *G. Caporale*                                      | Proietti A, Pistoni E, Lorusso A, Marcacci M, Di Domenico M, Ancora M, Curini V, Di Lollo Valeria, Mangone I, Rinaldi A, Scialabba S, Caporale M, Di Pasquale A, Cammà C, Puglia I, Calistri P, Savini G                                                                                                                  |
| EPI_ISL_1394757                                                                                                                                                                                                                                                                                                                                                                                                                                                                                                                                                                                                                                                                                                                                           | Laboratorio Analisi Osp. Città di Castello - Azienda USL Umbria1                                               | Istituto Zooprofilattico Sperimentale dell'Abruzzo e Molise *G. Caporale*                                      | Malagigi V, Tacconi P, Lorusso A, Marcacci M, Di Domenico M, Ancora M, Curini V, Di Lollo Valeria, Mangone I, Rinaldi A, Scialabba S, Caporale M, Di Pasquale A, Cammà C, Puglia I, Calistri P, Savini G                                                                                                                  |
| EPI_ISL_1399624, EPI_ISL_1399625, EPI_ISL_1399626, EPI_ISL_1399627, EPI_ISL_1399628, EPI_ISL_1399629                                                                                                                                                                                                                                                                                                                                                                                                                                                                                                                                                                                                                                                      | Instituto Nacional de Saude (INSA)                                                                             | Instituto Nacional de Saude (INSA)                                                                             | Borges et al                                                                                                                                                                                                                                                                                                              |
| EPI_ISL_1399630                                                                                                                                                                                                                                                                                                                                                                                                                                                                                                                                                                                                                                                                                                                                           | Instituto Nacional de Saude (INSA) and BioSystems & Integrative Sciences Institute (BioSI) Genomics Unit, FCUL | Instituto Nacional de Saude (INSA) and BioSystems & Integrative Sciences Institute (BioSI) Genomics Unit, FCUL | Borges et al                                                                                                                                                                                                                                                                                                              |
| EPI_ISL_1399631, EPI_ISL_1399632                                                                                                                                                                                                                                                                                                                                                                                                                                                                                                                                                                                                                                                                                                                          | Instituto Nacional de Saude (INSA) and Instituto Gulbenkian de Ciencia (IGC)                                   | Instituto Nacional de Saude (INSA) and Instituto Gulbenkian de Ciencia (IGC)                                   | Borges et al                                                                                                                                                                                                                                                                                                              |
| EPI_ISL_1400374, EPI_ISL_1400375, EPI_ISL_1400376, EPI_ISL_1400377, EPI_ISL_1400378, EPI_ISL_1400380                                                                                                                                                                                                                                                                                                                                                                                                                                                                                                                                                                                                                                                      | UW Virology Lab                                                                                                | UW Virology Lab                                                                                                | Pavitra Roychoudhury, Hong Xie, Lasata Shrestha, Shah Mohamed Bakhsh, Michelle Lin, Noah R. Baker, Sean Ellis, Saraswathi Sathees, Meei-Li Huang, Keith R Jerome, Alexander Greninger                                                                                                                                     |
| EPI_ISL_1401466, EPI_ISL_1401467                                                                                                                                                                                                                                                                                                                                                                                                                                                                                                                                                                                                                                                                                                                          | Hospital General Universitario Gregorio Marañón                                                                | Hospital General Universitario Gregorio Marañón                                                                | Sergio Buenestado Serrano, Pedro Sola Campoy, Laura Pérez-Lago, Cristina Rodríguez-Grande, Pilar Catalán, Patricia Muñoz, Darío García de Viedma                                                                                                                                                                          |
| EPI_ISL_1402431                                                                                                                                                                                                                                                                                                                                                                                                                                                                                                                                                                                                                                                                                                                                           | Laboratory of Respiratory Viruses and Measles, Oswaldo Cruz Institute, FIOCRUZ                                 | Laboratory of Respiratory Viruses and Measles, Oswaldo Cruz Institute, FIOCRUZ                                 | Paola Resende, Felipe Naveca, Alex Pauvolid-Correa, Mia Ferreira Araujo, Ana Beatriz Machado Lima, Luciana Appolinario, Fernando Motta, Anna Carolina Paixao, Ana Carolina Mendonca, Alice Sampaio Rocha, Renata Serrano Lopes, Marilda Siqueira on behalf of the Fiocruz COVID-19 Genomic Surveillance Network           |
| EPI_ISL_1402560                                                                                                                                                                                                                                                                                                                                                                                                                                                                                                                                                                                                                                                                                                                                           | UMC Groningen, Clinical Virology, Department of Medical Microbiology and Infection Prevention                  | UMC Groningen, Clinical Virology, Department of Medical Microbiology and Infection Prevention                  | Hubert Niesters, Alexander Friedrich, Erley Lizarazo-Forero, Monika Flissikowska, Lilli Gard, Sigrid Rosema, Coretta Van Leer-Buter, Xuwei Zhou, Marjolein Knoester                                                                                                                                                       |
| EPI_ISL_1403584                                                                                                                                                                                                                                                                                                                                                                                                                                                                                                                                                                                                                                                                                                                                           | DIP. PREV. AVEZZANO SERVIZIO DI IGIENE EPIDEMIOLOGIA E SANITA' PUBBLICA                                        | Istituto Zooprofilattico Sperimentale dell'Abruzzo e Molise *G. Caporale*                                      | Lorusso A, Marcacci M, Di Domenico M, Ancora M, Curini V, Mangone I, Delli Compagni E, Rinaldi A, Scialabba S, Di Pasquale A, Cammà C, Puglia I, Calistri P, Savini G                                                                                                                                                     |

|                                                                                                                 |                                                                                                                                     |                                                                                                                                            |                                                                                                                                                                                                                                                                                                                                                                                                                                                                                                                                                                                                                                                                                                                                                                                                                                                                                                          |
|-----------------------------------------------------------------------------------------------------------------|-------------------------------------------------------------------------------------------------------------------------------------|--------------------------------------------------------------------------------------------------------------------------------------------|----------------------------------------------------------------------------------------------------------------------------------------------------------------------------------------------------------------------------------------------------------------------------------------------------------------------------------------------------------------------------------------------------------------------------------------------------------------------------------------------------------------------------------------------------------------------------------------------------------------------------------------------------------------------------------------------------------------------------------------------------------------------------------------------------------------------------------------------------------------------------------------------------------|
| EPI_ISL_1403611                                                                                                 | AVEZZANO(L'AQUILA)<br>Molecular Virology Unit, Microbiology and Virology Department, Fondazione IRCCS Policlinico San Matteo, Pavia | Molecular Virology Unit, Microbiology and Virology Department, Fondazione IRCCS Policlinico San Matteo, Pavia                              | Federica Giardina, Guglielmo Ferrari, Stefano Gaiarsa, Gherard Batisti Biffignandi, Stefania Paolucci, Antonio Piralla, Fausto Baldanti                                                                                                                                                                                                                                                                                                                                                                                                                                                                                                                                                                                                                                                                                                                                                                  |
| EPI_ISL_1403617, EPI_ISL_1403623                                                                                | AZ Klina                                                                                                                            | AZ Klina                                                                                                                                   | Carl Vael - Lynsey Berckmans                                                                                                                                                                                                                                                                                                                                                                                                                                                                                                                                                                                                                                                                                                                                                                                                                                                                             |
| EPI_ISL_1403867                                                                                                 | Utah Public Health Laboratory                                                                                                       | Utah Public Health Laboratory                                                                                                              | Erin L. Young, Kelly F. Oakeson, Tara Gallagher                                                                                                                                                                                                                                                                                                                                                                                                                                                                                                                                                                                                                                                                                                                                                                                                                                                          |
| EPI_ISL_1404234                                                                                                 | Lab voor klinische biologie                                                                                                         | Lab voor klinische biologie                                                                                                                | Marija Janevska, Hannelore Hamerlinck, Bruno Verhasselt                                                                                                                                                                                                                                                                                                                                                                                                                                                                                                                                                                                                                                                                                                                                                                                                                                                  |
| EPI_ISL_1404433                                                                                                 | AZDelta                                                                                                                             | AZDelta                                                                                                                                    | Geert Martens; Dieter De Smet                                                                                                                                                                                                                                                                                                                                                                                                                                                                                                                                                                                                                                                                                                                                                                                                                                                                            |
| EPI_ISL_1404536, EPI_ISL_1404538                                                                                | Hôpital Henri Mondor                                                                                                                | Department of Virology, Henri Mondor University Hospital, Assistance Publique Hôpitaux de Paris, Université Paris-Est Créteil, INSERM U955 | Christophe Rodriguez, Slim Fourati, Vanessa Demontant, Guillaume Gricourt, Melissa N'Debi, Alexandre Soulier, Elisabeth Trawinski, Jean-Michel Pawlotsky                                                                                                                                                                                                                                                                                                                                                                                                                                                                                                                                                                                                                                                                                                                                                 |
| EPI_ISL_1404617, EPI_ISL_1404618, EPI_ISL_1404620, EPI_ISL_1404621                                              | Massachusetts State Public Health Laboratory                                                                                        | Massachusetts State Public Health Laboratory                                                                                               | Andrew Lang, Timelia Fink, Glen Gallagher, Sandra Smole                                                                                                                                                                                                                                                                                                                                                                                                                                                                                                                                                                                                                                                                                                                                                                                                                                                  |
| EPI_ISL_1405128, EPI_ISL_1405162, EPI_ISL_1405283                                                               | UW Virology Lab                                                                                                                     | UW Virology Lab                                                                                                                            | Pavitra Roychoudhury, Hong Xie, Lasata Shrestha, Shah Mohamed Bakhsh, Michelle Lin, Noah R. Baker, Sean Ellis, Saraswathi Sathees, Meei-Li Huang, Keith R Jerome, Alexander Greninger                                                                                                                                                                                                                                                                                                                                                                                                                                                                                                                                                                                                                                                                                                                    |
| EPI_ISL_1406151, EPI_ISL_1406179, EPI_ISL_1406183                                                               | Biolab Diagnostic Laboratories                                                                                                      | Biolab Diagnostic Laboratories                                                                                                             | Issa Abu-Dayyeh, Ahmad Tibi, Lama Hussein, Shayma Ali, Badia Sadeddin, Eiad Atwa, Amid Abdelnour                                                                                                                                                                                                                                                                                                                                                                                                                                                                                                                                                                                                                                                                                                                                                                                                         |
| EPI_ISL_1406435                                                                                                 | Area of Virology, Serology and Virology Division (SAVID), New South Wales Health Pathology Randwick                                 | Virology Research Laboratory; Area of Virology, Serology and Virology Division (SAVID), New South Wales Health Pathology Randwick          | Foster, C.; Au, J.; Ruiz Silva, M.; Wong, M.; Deveson, I.; Bull, R.; Van Hal, S.; Rawlinson, W.                                                                                                                                                                                                                                                                                                                                                                                                                                                                                                                                                                                                                                                                                                                                                                                                          |
| EPI_ISL_1406598, EPI_ISL_1406689                                                                                | Laboratorio de Virologia HUCA                                                                                                       | Laboratorio de Virologia HUCA                                                                                                              | Sandoval M, Castelló C, Gómez de Oña J, Boga JA, Rojo S, Alvarez-Arguelles ME, Abreu F, Costales I, Perez-Martínez Z, Martín-Rodríguez G, Coto E, Melón S                                                                                                                                                                                                                                                                                                                                                                                                                                                                                                                                                                                                                                                                                                                                                |
| EPI_ISL_1406698, EPI_ISL_1406699, EPI_ISL_1406704                                                               | Massachusetts State Public Health Laboratory                                                                                        | Massachusetts State Public Health Laboratory                                                                                               | Andrew Lang, Timelia Fink, Glen Gallagher, Sandra Smole                                                                                                                                                                                                                                                                                                                                                                                                                                                                                                                                                                                                                                                                                                                                                                                                                                                  |
| EPI_ISL_1407415                                                                                                 | Rhode Island Department of Health                                                                                                   | Infectious Disease Program, Broad Institute of Harvard and MIT                                                                             | Siddle,K.J., Azevedo,K., Miller,A., Adams,G., Pearlman,L., Gladden-Young,A., Lagerborg,K., Rudy,M., DeRuff,K., Carter,A., Normandin,E., Bauer,M., Reilly,S., Tomkins-Tinch,C., Loreth,C., Chaluvadi,S., Lemieux,J.E., Birren,B.W., Sabeti,P.C., Huard,R., King,E., Park,D.J., and MacInnis,B.L.                                                                                                                                                                                                                                                                                                                                                                                                                                                                                                                                                                                                          |
| EPI_ISL_1408896                                                                                                 | IL Dept. of Public Health Springfield Laboratory                                                                                    | Genomics and Discovery, Respiratory Viruses Branch, Division of Viral Diseases, Centers for Disease Control and Prevention                 | Ying Tao, Jing Zhang, Yan Li, Brian Lynch, Anna Kelleher, Krista Queen, Anna Uehara, Peter Cook, Han Jia Justin Ng, Clinton R. Paden, Haibin Wang, Suixiang Tong                                                                                                                                                                                                                                                                                                                                                                                                                                                                                                                                                                                                                                                                                                                                         |
| EPI_ISL_1409655, EPI_ISL_1409701                                                                                | Lighthouse Lab in Cambridge                                                                                                         | Wellcome Sanger Institute for the COVID-19 Genomics UK (COG-UK) Consortium                                                                 | Rob Howes, The Lighthouse Lab in Cambridge and Alex Alderton, Roberto Amato, Jeffrey Barrett, Sonia Goncalves, Ewan Harrison, David K. Jackson, Ian Johnston, Dominic Kwiatkowski, Cordelia Langford, John Sillitoe on behalf of the Wellcome Sanger Institute COVID-19 Surveillance Team                                                                                                                                                                                                                                                                                                                                                                                                                                                                                                                                                                                                                |
| EPI_ISL_1413799, EPI_ISL_1413803, EPI_ISL_1413805, EPI_ISL_1413813, EPI_ISL_1413823, EPI_ISL_1413829, see above | Broad Institute Clinical Research Sequencing Platform                                                                               | Infectious Disease Program, Broad Institute of Harvard and MIT                                                                             | EPI_ISL_1413845, EPI_ISL_1413851, EPI_ISL_1413856, EPI_ISL_1413859, EPI_ISL_1413861, EPI_ISL_1413864                                                                                                                                                                                                                                                                                                                                                                                                                                                                                                                                                                                                                                                                                                                                                                                                     |
| EPI_ISL_1415422                                                                                                 | USCA Avezzano AVEZZANO(L'AQUILA)                                                                                                    | Istituto Zooprofilattico Sperimentale dell'Abruzzo e Molise "G. Caporale"                                                                  | Lorusso A, Marcacci M, Di Domenico M, Ancora M, Curini V, Di Lollo Valeria, Mangone I, Rinaldi A, Delli Compagni E, Scialabba S, Caporale M, Di Pasquale A, Cammà C, Puglia I, Calistri P, Savini G                                                                                                                                                                                                                                                                                                                                                                                                                                                                                                                                                                                                                                                                                                      |
| EPI_ISL_1416312, EPI_ISL_1416316, EPI_ISL_1416317, EPI_ISL_1416319                                              | UOC Microbiologia e Virologia, Azienda Ospedaliera Universitaria Senese, Siena, Italy                                               | Dipartimento di Biotecnologie Mediche                                                                                                      | Maria Grazia Cusi, David Pinzauti, Claudia Gandolfo, Gabriele Anichini, Gianni Pozzi, Gianni Gori Savellini, Francesco Santoro                                                                                                                                                                                                                                                                                                                                                                                                                                                                                                                                                                                                                                                                                                                                                                           |
| EPI_ISL_1416322                                                                                                 | PathWest Laboratory Medicine WA                                                                                                     | PathWest Laboratory Medicine WA Microbial Surveillance Unit                                                                                | PathWest Laboratory Medicine WA Microbial Surveillance Unit                                                                                                                                                                                                                                                                                                                                                                                                                                                                                                                                                                                                                                                                                                                                                                                                                                              |
| EPI_ISL_1416805                                                                                                 | Platform BIS UZA/UAntwerpen                                                                                                         | UAntwerp, Laboratory of Medical Microbiology                                                                                               | Basil Britto Xavier, Jasmine Coppens, Marie Le Mercier, Christine Lammens, Veerle Matheussen, Herman Goossens                                                                                                                                                                                                                                                                                                                                                                                                                                                                                                                                                                                                                                                                                                                                                                                            |
| EPI_ISL_1416919                                                                                                 | Hospital                                                                                                                            | National Reference Center for Viruses of Respiratory Infections, Institut Pasteur, Paris                                                   | Marion Barbet, Sylvie Behillil, Méline Bizard,Frédéric Lemoine,Corinne Maufrais,Christophe Malabat, Angela Brisebarre, Camille Capel, Louise Lefrançois, Etienne Simon-Lorière, Vincent Enouf, Maud Vanpeene, Sylvie van der Werf,Dominique Descamps                                                                                                                                                                                                                                                                                                                                                                                                                                                                                                                                                                                                                                                     |
| EPI_ISL_1417191, EPI_ISL_1417204, EPI_ISL_1417205                                                               | Labo Analyses Med                                                                                                                   | National Reference Center for Viruses of Respiratory Infections, Insitut Pasteur, Paris                                                    | Marion Barbet, Sylvie Behillil, Méline Bizard,Frédéric Lemoine,Corinne Maufrais,Christophe Malabat, Angela Brisebarre, Camille Capel, Louise Lefrançois, Etienne Simon-Lorière, Vincent Enouf, Maud Vanpeene, Sylvie van der Werf,OpheLise Said-Delattre                                                                                                                                                                                                                                                                                                                                                                                                                                                                                                                                                                                                                                                 |
| EPI_ISL_1418135                                                                                                 | Swedish national genomic surveillance program of SARS-CoV-2                                                                         | The Public Health Agency of Sweden                                                                                                         | Swedish national genomic surveillance program of SARS-CoV-2                                                                                                                                                                                                                                                                                                                                                                                                                                                                                                                                                                                                                                                                                                                                                                                                                                              |
| EPI_ISL_1418235                                                                                                 | CNR Virus des Infections Respiratoires - France SUD                                                                                 | CNR Virus des Infections Respiratoires - France SUD                                                                                        | Antonin Bal, Gregory Destras, Gwendolyne Burfin, Hadrien Regue, Quentin Semanas, Martine Valette, Bruno Lina, Laurence Josset                                                                                                                                                                                                                                                                                                                                                                                                                                                                                                                                                                                                                                                                                                                                                                            |
| EPI_ISL_1418241                                                                                                 | AX BIO OCEAN                                                                                                                        | CNR Virus des Infections Respiratoires - France SUD                                                                                        | Antonin Bal, Gregory Destras, Gwendolyne Burfin, Hadrien Regue, Quentin Semanas, Martine Valette, Bruno Lina, Laurence Josset                                                                                                                                                                                                                                                                                                                                                                                                                                                                                                                                                                                                                                                                                                                                                                            |
| EPI_ISL_1418249, EPI_ISL_1418250                                                                                | BIOMNIS LYON                                                                                                                        | CNR Virus des Infections Respiratoires - France SUD                                                                                        | Antonin Bal, Gregory Destras, Gwendolyne Burfin, Hadrien Regue, Quentin Semanas, Martine Valette, Bruno Lina, Laurence Josset                                                                                                                                                                                                                                                                                                                                                                                                                                                                                                                                                                                                                                                                                                                                                                            |
| EPI_ISL_1418716, EPI_ISL_1418718                                                                                | Swedish national genomic surveillance program of SARS-CoV-2                                                                         | The Public Health Agency of Sweden                                                                                                         | Swedish national genomic surveillance program of SARS-CoV-2                                                                                                                                                                                                                                                                                                                                                                                                                                                                                                                                                                                                                                                                                                                                                                                                                                              |
| EPI_ISL_1420855, EPI_ISL_1420865, EPI_ISL_1420952                                                               | Helix/Illumina                                                                                                                      | Centers for Disease Control and Prevention Division of Viral Diseases, Pathogen Discovery                                                  | Peter W. Cook, Dakota Howard, Dhvani Batra, Ben L. Rambo-Martin, Eileen de Feo, Jan Antico, Christine Tran, Matthew Tolentino, Shannon Wickline, Kim Gietzen, Brad Sickler, Jingtao Liu, Eric Allen, Phil Febbo, Summer Galloway, Nicole L. Washington, Simon White, Geraint Levan, Kelly Schiabor Barrett, Elizabeth Cirulli, Alexandre Bolze, Ary Ascencio, Charlotte Rivera-Garcia, Ryan Cho, Jason Nguyen, Sherry Wang, Jimmy Ramirez, Tyler Cassens, Efrén Sandoval, Magnus Isaksson, William Lee, David Becker, Marc Laurent, James Lu, Clinton R. Paden, Suixiang Tong, Duncan MacCannell                                                                                                                                                                                                                                                                                                         |
| EPI_ISL_1420978                                                                                                 | Wisconsin State Laboratory of Hygiene Communicable Disease Division                                                                 | Wisconsin State Laboratory of Hygiene Communicable Disease Division                                                                        | Kelsey R. Florek, Abigail C. Shockey                                                                                                                                                                                                                                                                                                                                                                                                                                                                                                                                                                                                                                                                                                                                                                                                                                                                     |
| EPI_ISL_1421440                                                                                                 | Helix/Illumina                                                                                                                      | Centers for Disease Control and Prevention Division of Viral Diseases, Pathogen Discovery                                                  | Peter W. Cook, Dakota Howard, Dhvani Batra, Ben L. Rambo-Martin, Eileen de Feo, Jan Antico, Christine Tran, Matthew Tolentino, Shannon Wickline, Kim Gietzen, Brad Sickler, Jingtao Liu, Eric Allen, Phil Febbo, Summer Galloway, Nicole L. Washington, Simon White, Geraint Levan, Kelly Schiabor Barrett, Elizabeth Cirulli, Alexandre Bolze, Ary Ascencio, Charlotte Rivera-Garcia, Ryan Cho, Jason Nguyen, Sherry Wang, Jimmy Ramirez, Tyler Cassens, Efrén Sandoval, Magnus Isaksson, William Lee, David Becker, Marc Laurent, James Lu, Clinton R. Paden, Suixiang Tong, Duncan MacCannell                                                                                                                                                                                                                                                                                                         |
| EPI_ISL_1421776                                                                                                 | Laboratory Corporation of America                                                                                                   | Centers for Disease Control and Prevention Division of Viral Diseases, Pathogen Discovery                                                  | Peter W. Cook, Dakota Howard, Dhvani Batra, Ben L. Rambo-Martin, Minoo Agarwal, Eyad Almasri, Debbie Boles, Ayla Burns, Nuthawin Charoensri, Oren Cohen, Susan Countryman, Mary Ann Cristobal, Bobbi Croy, Suzanne Dale, Hrushikesh Deshmukh, Amanda Douglas, Vincent Drouillon, Marcia Eisenberg, Howard Engler, Rama Ghatti, Prashant Gupta, Susan Hicks, Jake Humphrey, Lax Iyer, Manoj Jain, Mohan Kolli, Brian Krueger, Tim Kuphal, Stanley Letovsky, Michael Levandoski, Craig Lukasik, Jonathan Meltzer, Brian Norvell, Mindy Nye, Scott Parker, Christos Petropoulos, John Pruitt, Steven Ragan, Scott Ryan, Mike Sapeta, Jana Schroth, Suresh Babu Selvaraju, Goran Stevovic, Amanda Suchanek, Andrea Throop, Lyndon Tilson, Thomas Urban, Joe Voshell, Kimberly Wagner, Jonathan Williams, Mary Williamson, Qian Zeng, Tricia Zwiefelhofer, Clinton R. Paden, Suixiang Tong, Duncan MacCannell |
| EPI_ISL_1427654                                                                                                 | SARS-CoV-2 testing team, National Institute of Infectious Diseases                                                                  | Pathogen Genomics Center, National Institute of Infectious Diseases                                                                        | Tsuyoshi Sekizuka, Kentaro Itokawa, Rina Tanaka, Masanori Hashino, Daisuke Kobayashi, Kento Fukano, Hussein H. Aly, Takanobu Kato, Makoto Kuroda                                                                                                                                                                                                                                                                                                                                                                                                                                                                                                                                                                                                                                                                                                                                                         |
| EPI_ISL_1428639                                                                                                 | Pathogen Genomics Center, National Institute of Infectious                                                                          | Pathogen Genomics Center, National Institute of Infectious                                                                                 | Tsuyoshi Sekizuka, Kentaro Itokawa, Rina Tanaka, Masanori Hashino, Makoto Kuroda                                                                                                                                                                                                                                                                                                                                                                                                                                                                                                                                                                                                                                                                                                                                                                                                                         |

|                                                                                     | Diseases                                                                                         | Diseases                                                                                                                          |                                                                                                                                                                                                                                                                                                                                                                                                                                                                                                                                                                                    |
|-------------------------------------------------------------------------------------|--------------------------------------------------------------------------------------------------|-----------------------------------------------------------------------------------------------------------------------------------|------------------------------------------------------------------------------------------------------------------------------------------------------------------------------------------------------------------------------------------------------------------------------------------------------------------------------------------------------------------------------------------------------------------------------------------------------------------------------------------------------------------------------------------------------------------------------------|
| EPI_ISL_1428640                                                                     | SARS-CoV-2 testing team, National Institute of Infectious Diseases                               | Pathogen Genomics Center, National Institute of Infectious Diseases                                                               | Tsuyoshi Sekizuka, Kentaro Itokawa, Rina Tanaka, Masanori Hashino, Eri Nakayama, Motohiko Ogawa, Shigeru Tanjima, Takahiro Maeki, Chang-Kweng Lim, Makoto Kuroda                                                                                                                                                                                                                                                                                                                                                                                                                   |
| EPI_ISL_1430687, EPI_ISL_1430688, EPI_ISL_1430689, EPI_ISL_1430690                  | Saitama Prefectural Institute of Public Health                                                   | Pathogen Genomics Center, National Institute of Infectious Diseases                                                               | Tsuyoshi Sekizuka, Kentaro Itokawa, Rina Tanaka, Masanori Hashino, Daisuke Kobayashi, Kousho Wakae, Hussein H. Aly, Takanobu Kato, , Makoto Kuroda                                                                                                                                                                                                                                                                                                                                                                                                                                 |
| EPI_ISL_1430695, EPI_ISL_1430696                                                    | Saitama Prefectural Institute of Public Health                                                   | Pathogen Genomics Center, National Institute of Infectious Diseases                                                               | Tsuyoshi Sekizuka, Kentaro Itokawa, Rina Tanaka, Masanori Hashino, Minoru Nagi, Ken Miyazawa, Takashi Sakudoh, Nozomu Hanaoka, Tsuguto Fujimoto, Makoto Kuroda                                                                                                                                                                                                                                                                                                                                                                                                                     |
| EPI_ISL_1430697                                                                     | SARS-CoV-2 testing team, National Institute of Infectious Diseases                               | Pathogen Genomics Center, National Institute of Infectious Diseases                                                               | Tsuyoshi Sekizuka, Kentaro Itokawa, Rina Tanaka, Masanori Hashino, Yoshihiro Kaku, Yasutaka Hoshino, Chikako Shimokawa, Eunsil Park, Tsuguto Fujimoto, Makoto Kuroda                                                                                                                                                                                                                                                                                                                                                                                                               |
| EPI_ISL_1430698                                                                     | Saitama Prefectural Institute of Public Health                                                   | Pathogen Genomics Center, National Institute of Infectious Diseases                                                               | Tsuyoshi Sekizuka, Kentaro Itokawa, Rina Tanaka, Masanori Hashino, Eri Nakayama, Motohiko Ogawa, Takahiro Maeki, Shigeru Tanjima, Chang-Kweng Lim, Makoto Kuroda                                                                                                                                                                                                                                                                                                                                                                                                                   |
| EPI_ISL_1432466                                                                     | SYNLAB MVZ Ettlingen                                                                             | Robert Koch Institute                                                                                                             | unknown                                                                                                                                                                                                                                                                                                                                                                                                                                                                                                                                                                            |
| EPI_ISL_1433067                                                                     | Bioscientia MVZ Labor Karlsruhe GmbH                                                             | Robert Koch Institute                                                                                                             | unknown                                                                                                                                                                                                                                                                                                                                                                                                                                                                                                                                                                            |
| EPI_ISL_1436165                                                                     | Sonic - Dr. Staber & Kollegen GmbH München                                                       | Robert Koch Institute                                                                                                             | unknown                                                                                                                                                                                                                                                                                                                                                                                                                                                                                                                                                                            |
| EPI_ISL_1438462, EPI_ISL_1438464                                                    | Plateforme de testing Namuroise                                                                  | Plateforme de testing Namuroise                                                                                                   | ; Otto Gaetan ; Denis Olivier ; Degosserie Jonathan ; Mullier François                                                                                                                                                                                                                                                                                                                                                                                                                                                                                                             |
| EPI_ISL_1438791, EPI_ISL_1439298                                                    | LabKom - Labor Augsburg MVZ GmbH                                                                 | Robert Koch Institute                                                                                                             | unknown                                                                                                                                                                                                                                                                                                                                                                                                                                                                                                                                                                            |
| EPI_ISL_1442147, EPI_ISL_1442187                                                    | Azienda Ospedaliero - Universitaria di Modena Policlinico - Virologia e Microbiologia Molecolare | Istituto Zooprofilattico Sperimentale della Lombardia e dell'Emilia Romagna (IZSLER), Risk Analysis and Genomic Epidemiology Unit | Monica Pecorari, William Gennari, Giulia Fregni Serpini, Marina Morganti, Ilaria Menozzi, Erika Scaltriti, Stefano Pongolini                                                                                                                                                                                                                                                                                                                                                                                                                                                       |
| EPI_ISL_1443006, EPI_ISL_1443008, EPI_ISL_1443012, EPI_ISL_1443013, EPI_ISL_1443019 | Arcispedale Santa Maria Nuova, Autoimmunità, Allergologia e Biotecnologie Innovative             | Istituto Zooprofilattico Sperimentale della Lombardia e dell'Emilia Romagna (IZSLER), Risk Analysis and Genomic Epidemiology Unit | Alessandro Zerbinì, Lucia Belloni, Stefania Croci, Marina Morganti, Ilaria Menozzi, Erika Scaltriti, Stefano Pongolini                                                                                                                                                                                                                                                                                                                                                                                                                                                             |
| EPI_ISL_1443196, EPI_ISL_1443197, EPI_ISL_1443198                                   | Hospital Aliança                                                                                 | Hospital São Rafael - IDOR                                                                                                        | Isadora Cristina de Siqueira, Aquiles Assunção Camelier, Elves A.P. Maciel, Margarida Celia L. C. Neves, Carolina Kymie Vasques Nonaka, Karoline Almeida Félix de Sousa, Victor Costa Araujo, Yasmin Santos Freitas Macêdo, Aurea Angelica Paste, Bruno Solano de Freitas Souza, Tiago Gráf                                                                                                                                                                                                                                                                                        |
| EPI_ISL_1443424                                                                     | Lab voor klinische biologie                                                                      | Lab voor klinische biologie                                                                                                       | Marija Janevska, Hannelore Hamerlinck, Bruno Verhasselt                                                                                                                                                                                                                                                                                                                                                                                                                                                                                                                            |
| EPI_ISL_1443701, EPI_ISL_1443720                                                    | Platform BIS UZA/UAntwerpen                                                                      | Labo Klinische Biologie, UZA                                                                                                      | Marie Le Mercier, Jasmine Coppens, Basil Britto Xavier, Christine Lammens, Veerle Matheeußen, Herman Goossens                                                                                                                                                                                                                                                                                                                                                                                                                                                                      |
| EPI_ISL_1445071                                                                     | USF TRES PONTES                                                                                  | Instituto Butantan / Mendelics                                                                                                    | Dimas Tadeu Covas, Sandra Coccuzzo Sampaio, Maria Carolina Elias, José Salvatore Leister Patané, Vincent Louis Viala, Antonio Jorge Martins, Ricardo Haddad, Claudia Renata dos Santos Barros, Elaine Cristina Marqueze, Raul Machado Neto, Debora Botequiu Moretti, Bibiana Santos, João Paulo Kitajima, Erika Freitas, David Schlesinger, Simone Kashima, Evandra Strazza Rodrigues, Svetoslav Nanev Slavov, Elaine Vieira dos Santos, Rafael dos Santos Bezerra, Luiz Carlos Junior de Alcantara, Marta Giovanetti, Vagner Fonseca, Flavia Aburjaile, Rodrigo Tocantins Calado. |
| EPI_ISL_1445072                                                                     | USF JARDIM SAO DIMAS                                                                             | Instituto Butantan / Mendelics                                                                                                    | Dimas Tadeu Covas, Sandra Coccuzzo Sampaio, Maria Carolina Elias, José Salvatore Leister Patané, Vincent Louis Viala, Antonio Jorge Martins, Ricardo Haddad, Claudia Renata dos Santos Barros, Elaine Cristina Marqueze, Raul Machado Neto, Debora Botequiu Moretti, Bibiana Santos, João Paulo Kitajima, Erika Freitas, David Schlesinger, Simone Kashima, Evandra Strazza Rodrigues, Svetoslav Nanev Slavov, Elaine Vieira dos Santos, Rafael dos Santos Bezerra, Luiz Carlos Junior de Alcantara, Marta Giovanetti, Vagner Fonseca, Flavia Aburjaile, Rodrigo Tocantins Calado. |
| EPI_ISL_1445078                                                                     | CENTRO DE SAUDE II DR GABRIEL MESQUITA VARGEM GDE DO SUL                                         | Instituto Butantan / Mendelics                                                                                                    | Dimas Tadeu Covas, Sandra Coccuzzo Sampaio, Maria Carolina Elias, José Salvatore Leister Patané, Vincent Louis Viala, Antonio Jorge Martins, Ricardo Haddad, Claudia Renata dos Santos Barros, Elaine Cristina Marqueze, Raul Machado Neto, Debora Botequiu Moretti, Bibiana Santos, João Paulo Kitajima, Erika Freitas, David Schlesinger, Simone Kashima, Evandra Strazza Rodrigues, Svetoslav Nanev Slavov, Elaine Vieira dos Santos, Rafael dos Santos Bezerra, Luiz Carlos Junior de Alcantara, Marta Giovanetti, Vagner Fonseca, Flavia Aburjaile, Rodrigo Tocantins Calado. |
| EPI_ISL_1445082                                                                     | SECRETARIA MUNICIPAL DE SAUDE SOROCABA                                                           | Instituto Butantan / Mendelics                                                                                                    | Dimas Tadeu Covas, Sandra Coccuzzo Sampaio, Maria Carolina Elias, José Salvatore Leister Patané, Vincent Louis Viala, Antonio Jorge Martins, Ricardo Haddad, Claudia Renata dos Santos Barros, Elaine Cristina Marqueze, Raul Machado Neto, Debora Botequiu Moretti, Bibiana Santos, João Paulo Kitajima, Erika Freitas, David Schlesinger, Simone Kashima, Evandra Strazza Rodrigues, Svetoslav Nanev Slavov, Elaine Vieira dos Santos, Rafael dos Santos Bezerra, Luiz Carlos Junior de Alcantara, Marta Giovanetti, Vagner Fonseca, Flavia Aburjaile, Rodrigo Tocantins Calado. |
| EPI_ISL_1445084                                                                     | SMS SECRETARIA MUNICIPAL DE SAUDE DE BOITUVA                                                     | Instituto Butantan / Mendelics                                                                                                    | Dimas Tadeu Covas, Sandra Coccuzzo Sampaio, Maria Carolina Elias, José Salvatore Leister Patané, Vincent Louis Viala, Antonio Jorge Martins, Ricardo Haddad, Claudia Renata dos Santos Barros, Elaine Cristina Marqueze, Raul Machado Neto, Debora Botequiu Moretti, Bibiana Santos, João Paulo Kitajima, Erika Freitas, David Schlesinger, Simone Kashima, Evandra Strazza Rodrigues, Svetoslav Nanev Slavov, Elaine Vieira dos Santos, Rafael dos Santos Bezerra, Luiz Carlos Junior de Alcantara, Marta Giovanetti, Vagner Fonseca, Flavia Aburjaile, Rodrigo Tocantins Calado. |
| EPI_ISL_1445088                                                                     | SECRETARIA MUNICIPAL DE SAUDE SOROCABA                                                           | Instituto Butantan / Mendelics                                                                                                    | Dimas Tadeu Covas, Sandra Coccuzzo Sampaio, Maria Carolina Elias, José Salvatore Leister Patané, Vincent Louis Viala, Antonio Jorge Martins, Ricardo Haddad, Claudia Renata dos Santos Barros, Elaine Cristina Marqueze, Raul Machado Neto, Debora Botequiu Moretti, Bibiana Santos, João Paulo Kitajima, Erika Freitas, David Schlesinger, Simone Kashima, Evandra Strazza Rodrigues, Svetoslav Nanev Slavov, Elaine Vieira dos Santos, Rafael dos Santos Bezerra, Luiz Carlos Junior de Alcantara, Marta Giovanetti, Vagner Fonseca, Flavia Aburjaile, Rodrigo Tocantins Calado. |
| EPI_ISL_1445091, EPI_ISL_1445092, EPI_ISL_1445093, EPI_ISL_1445094, EPI_ISL_1445095 | SECRETARIA MUNICIPAL DE SAUDE DE PIRACAIA                                                        | Instituto Butantan / Mendelics                                                                                                    | Dimas Tadeu Covas, Sandra Coccuzzo Sampaio, Maria Carolina Elias, José Salvatore Leister Patané, Vincent Louis Viala, Antonio Jorge Martins, Ricardo Haddad, Claudia Renata dos Santos Barros, Elaine Cristina Marqueze, Raul Machado Neto, Debora Botequiu Moretti, Bibiana Santos, João Paulo Kitajima, Erika Freitas, David Schlesinger, Simone Kashima, Evandra Strazza Rodrigues, Svetoslav Nanev Slavov, Elaine Vieira dos Santos, Rafael dos Santos Bezerra, Luiz Carlos Junior de Alcantara, Marta Giovanetti, Vagner Fonseca, Flavia Aburjaile, Rodrigo Tocantins Calado. |
| EPI_ISL_1445096, EPI_ISL_1445097, EPI_ISL_1445098, EPI_ISL_1445100                  | PRONTO ATENDIMENTO VILA PADRE ANCHIETA                                                           | Instituto Butantan / Mendelics                                                                                                    | Dimas Tadeu Covas, Sandra Coccuzzo Sampaio, Maria Carolina Elias, José Salvatore Leister Patané, Vincent Louis Viala, Antonio Jorge Martins, Ricardo Haddad, Claudia Renata dos Santos Barros, Elaine Cristina Marqueze, Raul Machado Neto, Debora Botequiu Moretti, Bibiana Santos, João Paulo Kitajima, Erika Freitas, David Schlesinger, Simone Kashima, Evandra Strazza Rodrigues, Svetoslav Nanev Slavov, Elaine Vieira dos Santos, Rafael dos Santos Bezerra, Luiz Carlos Junior de Alcantara, Marta Giovanetti, Vagner Fonseca, Flavia Aburjaile, Rodrigo Tocantins Calado. |
| EPI_ISL_1445101                                                                     | SECRETARIA MUNICIPAL DE SAUDE DE PIRACAIA                                                        | Instituto Butantan / Mendelics                                                                                                    | Dimas Tadeu Covas, Sandra Coccuzzo Sampaio, Maria Carolina Elias, José Salvatore Leister Patané, Vincent Louis Viala, Antonio Jorge Martins, Ricardo Haddad, Claudia Renata dos Santos Barros, Elaine Cristina Marqueze, Raul Machado Neto, Debora Botequiu Moretti, Bibiana Santos, João Paulo Kitajima, Erika Freitas, David Schlesinger, Simone Kashima, Evandra Strazza Rodrigues, Svetoslav Nanev Slavov, Elaine Vieira dos Santos, Rafael dos Santos Bezerra, Luiz Carlos Junior de Alcantara, Marta Giovanetti, Vagner Fonseca, Flavia Aburjaile, Rodrigo Tocantins Calado. |
| EPI_ISL_1445102, EPI_ISL_1445103, EPI_ISL_1445104, EPI_ISL_1445106                  | PRONTO ATENDIMENTO VILA PADRE ANCHIETA                                                           | Instituto Butantan / Mendelics                                                                                                    | Dimas Tadeu Covas, Sandra Coccuzzo Sampaio, Maria Carolina Elias, José Salvatore Leister Patané, Vincent Louis Viala, Antonio Jorge Martins, Ricardo Haddad, Claudia Renata dos Santos Barros, Elaine Cristina Marqueze, Raul Machado Neto, Debora Botequiu Moretti, Bibiana Santos, João Paulo Kitajima, Erika Freitas, David Schlesinger, Simone Kashima, Evandra Strazza Rodrigues, Svetoslav Nanev Slavov, Elaine Vieira dos Santos, Rafael dos Santos Bezerra, Luiz Carlos Junior de Alcantara, Marta Giovanetti, Vagner Fonseca, Flavia Aburjaile, Rodrigo Tocantins Calado. |
| EPI_ISL_1445109, EPI_ISL_1445110                                                    | COMPLEXO HOSPITALAR OURO VERDE DE CAMPINAS                                                       | Instituto Butantan / Mendelics                                                                                                    | Dimas Tadeu Covas, Sandra Coccuzzo Sampaio, Maria Carolina Elias, José Salvatore Leister Patané, Vincent Louis Viala, Antonio Jorge Martins, Ricardo Haddad, Claudia Renata dos Santos Barros, Elaine Cristina Marqueze, Raul Machado Neto, Debora Botequiu Moretti, Bibiana Santos, João Paulo Kitajima, Erika Freitas, David Schlesinger, Simone Kashima, Evandra Strazza Rodrigues, Svetoslav Nanev Slavov, Elaine Vieira dos Santos, Rafael dos Santos Bezerra, Luiz Carlos Junior de Alcantara, Marta Giovanetti, Vagner Fonseca, Flavia Aburjaile, Rodrigo Tocantins Calado. |
| EPI_ISL_1445111, EPI_ISL_1445112                                                    | PRONTO ATENDIMENTO VILA PADRE ANCHIETA                                                           | Instituto Butantan / Mendelics                                                                                                    | Dimas Tadeu Covas, Sandra Coccuzzo Sampaio, Maria Carolina Elias, José Salvatore Leister Patané, Vincent Louis Viala, Antonio Jorge Martins, Ricardo Haddad, Claudia Renata dos Santos Barros, Elaine Cristina Marqueze, Raul Machado Neto, Debora Botequiu Moretti, Bibiana Santos, João Paulo Kitajima, Erika Freitas, David Schlesinger, Simone Kashima, Evandra Strazza Rodrigues, Svetoslav Nanev Slavov, Elaine Vieira dos Santos, Rafael dos Santos Bezerra, Luiz Carlos Junior de Alcantara, Marta Giovanetti, Vagner Fonseca, Flavia Aburjaile, Rodrigo Tocantins Calado. |





|                                                                                                                                                                                                                                                                                                                                                                     |                                                            |                                                                                           |                                                                                                                                                                                                                                                                                                                                                                                                                                                                                                                                                                                    |
|---------------------------------------------------------------------------------------------------------------------------------------------------------------------------------------------------------------------------------------------------------------------------------------------------------------------------------------------------------------------|------------------------------------------------------------|-------------------------------------------------------------------------------------------|------------------------------------------------------------------------------------------------------------------------------------------------------------------------------------------------------------------------------------------------------------------------------------------------------------------------------------------------------------------------------------------------------------------------------------------------------------------------------------------------------------------------------------------------------------------------------------|
| EPI_ISL_1445221, EPI_ISL_1445223                                                                                                                                                                                                                                                                                                                                    | UBS HELENA MARREY                                          | Instituto Butantan / Mendelics                                                            | Dimas Tadeu Covas, Sandra Coccuzzo Sampaio, Maria Carolina Elias, José Salvatore Leister Patané, Vincent Louis Viala, Antonio Jorge Martins, Ricardo Haddad, Claudia Renata dos Santos Barros, Elaine Cristina Marqueze, Raul Machado Neto, Debora Botequiu Moretti, Bibiana Santos, João Paulo Kitajima, Erika Freitas, David Schlesinger, Simone Kashima, Evandra Strazza Rodrigues, Svetoslav Nanev Slavov, Elaine Vieira dos Santos, Rafael dos Santos Bezerra, Luiz Carlos Junior de Alcantara, Marta Giovanetti, Vagner Fonseca, Flavia Aburjaile, Rodrigo Tocantins Calado. |
| EPI_ISL_1445224                                                                                                                                                                                                                                                                                                                                                     | PPA FENELON GUEDES PEREIRA                                 | Instituto Butantan / Mendelics                                                            | Dimas Tadeu Covas, Sandra Coccuzzo Sampaio, Maria Carolina Elias, José Salvatore Leister Patané, Vincent Louis Viala, Antonio Jorge Martins, Ricardo Haddad, Claudia Renata dos Santos Barros, Elaine Cristina Marqueze, Raul Machado Neto, Debora Botequiu Moretti, Bibiana Santos, João Paulo Kitajima, Erika Freitas, David Schlesinger, Simone Kashima, Evandra Strazza Rodrigues, Svetoslav Nanev Slavov, Elaine Vieira dos Santos, Rafael dos Santos Bezerra, Luiz Carlos Junior de Alcantara, Marta Giovanetti, Vagner Fonseca, Flavia Aburjaile, Rodrigo Tocantins Calado. |
| EPI_ISL_1445225                                                                                                                                                                                                                                                                                                                                                     | PRONTO SOCORRO DR ANTONIO FLAVIO FRANCA                    | Instituto Butantan / Mendelics                                                            | Dimas Tadeu Covas, Sandra Coccuzzo Sampaio, Maria Carolina Elias, José Salvatore Leister Patané, Vincent Louis Viala, Antonio Jorge Martins, Ricardo Haddad, Claudia Renata dos Santos Barros, Elaine Cristina Marqueze, Raul Machado Neto, Debora Botequiu Moretti, Bibiana Santos, João Paulo Kitajima, Erika Freitas, David Schlesinger, Simone Kashima, Evandra Strazza Rodrigues, Svetoslav Nanev Slavov, Elaine Vieira dos Santos, Rafael dos Santos Bezerra, Luiz Carlos Junior de Alcantara, Marta Giovanetti, Vagner Fonseca, Flavia Aburjaile, Rodrigo Tocantins Calado. |
| EPI_ISL_1445226                                                                                                                                                                                                                                                                                                                                                     | UBS SYLVIO JOAO L DE LUCIA                                 | Instituto Butantan / Mendelics                                                            | Dimas Tadeu Covas, Sandra Coccuzzo Sampaio, Maria Carolina Elias, José Salvatore Leister Patané, Vincent Louis Viala, Antonio Jorge Martins, Ricardo Haddad, Claudia Renata dos Santos Barros, Elaine Cristina Marqueze, Raul Machado Neto, Debora Botequiu Moretti, Bibiana Santos, João Paulo Kitajima, Erika Freitas, David Schlesinger, Simone Kashima, Evandra Strazza Rodrigues, Svetoslav Nanev Slavov, Elaine Vieira dos Santos, Rafael dos Santos Bezerra, Luiz Carlos Junior de Alcantara, Marta Giovanetti, Vagner Fonseca, Flavia Aburjaile, Rodrigo Tocantins Calado. |
| EPI_ISL_1445227                                                                                                                                                                                                                                                                                                                                                     | UBS EMILIA COSME CERQUEIRA                                 | Instituto Butantan / Mendelics                                                            | Dimas Tadeu Covas, Sandra Coccuzzo Sampaio, Maria Carolina Elias, José Salvatore Leister Patané, Vincent Louis Viala, Antonio Jorge Martins, Ricardo Haddad, Claudia Renata dos Santos Barros, Elaine Cristina Marqueze, Raul Machado Neto, Debora Botequiu Moretti, Bibiana Santos, João Paulo Kitajima, Erika Freitas, David Schlesinger, Simone Kashima, Evandra Strazza Rodrigues, Svetoslav Nanev Slavov, Elaine Vieira dos Santos, Rafael dos Santos Bezerra, Luiz Carlos Junior de Alcantara, Marta Giovanetti, Vagner Fonseca, Flavia Aburjaile, Rodrigo Tocantins Calado. |
| EPI_ISL_1445228                                                                                                                                                                                                                                                                                                                                                     | UBS IRMA AGUEDA MARIA JAIME                                | Instituto Butantan / Mendelics                                                            | Dimas Tadeu Covas, Sandra Coccuzzo Sampaio, Maria Carolina Elias, José Salvatore Leister Patané, Vincent Louis Viala, Antonio Jorge Martins, Ricardo Haddad, Claudia Renata dos Santos Barros, Elaine Cristina Marqueze, Raul Machado Neto, Debora Botequiu Moretti, Bibiana Santos, João Paulo Kitajima, Erika Freitas, David Schlesinger, Simone Kashima, Evandra Strazza Rodrigues, Svetoslav Nanev Slavov, Elaine Vieira dos Santos, Rafael dos Santos Bezerra, Luiz Carlos Junior de Alcantara, Marta Giovanetti, Vagner Fonseca, Flavia Aburjaile, Rodrigo Tocantins Calado. |
| EPI_ISL_1445230, EPI_ISL_1445231, EPI_ISL_1445233, EPI_ISL_1445234, EPI_ISL_1445236, EPI_ISL_1445237                                                                                                                                                                                                                                                                | VIGILANCIA EPIDEMIOLOGICA                                  | Instituto Butantan / Mendelics                                                            | Dimas Tadeu Covas, Sandra Coccuzzo Sampaio, Maria Carolina Elias, José Salvatore Leister Patané, Vincent Louis Viala, Antonio Jorge Martins, Ricardo Haddad, Claudia Renata dos Santos Barros, Elaine Cristina Marqueze, Raul Machado Neto, Debora Botequiu Moretti, Bibiana Santos, João Paulo Kitajima, Erika Freitas, David Schlesinger, Simone Kashima, Evandra Strazza Rodrigues, Svetoslav Nanev Slavov, Elaine Vieira dos Santos, Rafael dos Santos Bezerra, Luiz Carlos Junior de Alcantara, Marta Giovanetti, Vagner Fonseca, Flavia Aburjaile, Rodrigo Tocantins Calado. |
| EPI_ISL_1445238, EPI_ISL_1445239, EPI_ISL_1445240, EPI_ISL_1445246, EPI_ISL_1445247                                                                                                                                                                                                                                                                                 | SECAO CENTRO DE DIAGNOSTICO SECEDI                         | Instituto Butantan / Mendelics                                                            | Dimas Tadeu Covas, Sandra Coccuzzo Sampaio, Maria Carolina Elias, José Salvatore Leister Patané, Vincent Louis Viala, Antonio Jorge Martins, Ricardo Haddad, Claudia Renata dos Santos Barros, Elaine Cristina Marqueze, Raul Machado Neto, Debora Botequiu Moretti, Bibiana Santos, João Paulo Kitajima, Erika Freitas, David Schlesinger, Simone Kashima, Evandra Strazza Rodrigues, Svetoslav Nanev Slavov, Elaine Vieira dos Santos, Rafael dos Santos Bezerra, Luiz Carlos Junior de Alcantara, Marta Giovanetti, Vagner Fonseca, Flavia Aburjaile, Rodrigo Tocantins Calado. |
| EPI_ISL_1445250, EPI_ISL_1445254, EPI_ISL_1445255, EPI_ISL_1445257, EPI_ISL_1445258, EPI_ISL_1445259, EPI_ISL_1445260, EPI_ISL_1445261, EPI_ISL_1445263                                                                                                                                                                                                             | VIGILANCIA EPIDEMIOLOGICA                                  | Instituto Butantan / Mendelics                                                            | Dimas Tadeu Covas, Sandra Coccuzzo Sampaio, Maria Carolina Elias, José Salvatore Leister Patané, Vincent Louis Viala, Antonio Jorge Martins, Ricardo Haddad, Claudia Renata dos Santos Barros, Elaine Cristina Marqueze, Raul Machado Neto, Debora Botequiu Moretti, Bibiana Santos, João Paulo Kitajima, Erika Freitas, David Schlesinger, Simone Kashima, Evandra Strazza Rodrigues, Svetoslav Nanev Slavov, Elaine Vieira dos Santos, Rafael dos Santos Bezerra, Luiz Carlos Junior de Alcantara, Marta Giovanetti, Vagner Fonseca, Flavia Aburjaile, Rodrigo Tocantins Calado. |
| EPI_ISL_1445264                                                                                                                                                                                                                                                                                                                                                     | AMBULATORIO MEDICO DE ESPECIALIDADES DE PERUIBE            | Instituto Butantan / Mendelics                                                            | Dimas Tadeu Covas, Sandra Coccuzzo Sampaio, Maria Carolina Elias, José Salvatore Leister Patané, Vincent Louis Viala, Antonio Jorge Martins, Ricardo Haddad, Claudia Renata dos Santos Barros, Elaine Cristina Marqueze, Raul Machado Neto, Debora Botequiu Moretti, Bibiana Santos, João Paulo Kitajima, Erika Freitas, David Schlesinger, Simone Kashima, Evandra Strazza Rodrigues, Svetoslav Nanev Slavov, Elaine Vieira dos Santos, Rafael dos Santos Bezerra, Luiz Carlos Junior de Alcantara, Marta Giovanetti, Vagner Fonseca, Flavia Aburjaile, Rodrigo Tocantins Calado. |
| EPI_ISL_1445265                                                                                                                                                                                                                                                                                                                                                     | VIGILANCIA EPIDEMIOLOGICA                                  | Instituto Butantan / Mendelics                                                            | Dimas Tadeu Covas, Sandra Coccuzzo Sampaio, Maria Carolina Elias, José Salvatore Leister Patané, Vincent Louis Viala, Antonio Jorge Martins, Ricardo Haddad, Claudia Renata dos Santos Barros, Elaine Cristina Marqueze, Raul Machado Neto, Debora Botequiu Moretti, Bibiana Santos, João Paulo Kitajima, Erika Freitas, David Schlesinger, Simone Kashima, Evandra Strazza Rodrigues, Svetoslav Nanev Slavov, Elaine Vieira dos Santos, Rafael dos Santos Bezerra, Luiz Carlos Junior de Alcantara, Marta Giovanetti, Vagner Fonseca, Flavia Aburjaile, Rodrigo Tocantins Calado. |
| EPI_ISL_1445266, EPI_ISL_1445267                                                                                                                                                                                                                                                                                                                                    | AMBULATORIO MEDICO DE ESPECIALIDADES DE PERUIBE            | Instituto Butantan / Mendelics                                                            | Dimas Tadeu Covas, Sandra Coccuzzo Sampaio, Maria Carolina Elias, José Salvatore Leister Patané, Vincent Louis Viala, Antonio Jorge Martins, Ricardo Haddad, Claudia Renata dos Santos Barros, Elaine Cristina Marqueze, Raul Machado Neto, Debora Botequiu Moretti, Bibiana Santos, João Paulo Kitajima, Erika Freitas, David Schlesinger, Simone Kashima, Evandra Strazza Rodrigues, Svetoslav Nanev Slavov, Elaine Vieira dos Santos, Rafael dos Santos Bezerra, Luiz Carlos Junior de Alcantara, Marta Giovanetti, Vagner Fonseca, Flavia Aburjaile, Rodrigo Tocantins Calado. |
| EPI_ISL_1445268                                                                                                                                                                                                                                                                                                                                                     | VIGILANCIA EPIDEMIOLOGICA                                  | Instituto Butantan / Mendelics                                                            | Dimas Tadeu Covas, Sandra Coccuzzo Sampaio, Maria Carolina Elias, José Salvatore Leister Patané, Vincent Louis Viala, Antonio Jorge Martins, Ricardo Haddad, Claudia Renata dos Santos Barros, Elaine Cristina Marqueze, Raul Machado Neto, Debora Botequiu Moretti, Bibiana Santos, João Paulo Kitajima, Erika Freitas, David Schlesinger, Simone Kashima, Evandra Strazza Rodrigues, Svetoslav Nanev Slavov, Elaine Vieira dos Santos, Rafael dos Santos Bezerra, Luiz Carlos Junior de Alcantara, Marta Giovanetti, Vagner Fonseca, Flavia Aburjaile, Rodrigo Tocantins Calado. |
| EPI_ISL_1445269                                                                                                                                                                                                                                                                                                                                                     | SERV DE VIG SANITARIA EPIDEMIO E CTRL DE ZOONOSZES GUARUJA | Instituto Butantan / Mendelics                                                            | Dimas Tadeu Covas, Sandra Coccuzzo Sampaio, Maria Carolina Elias, José Salvatore Leister Patané, Vincent Louis Viala, Antonio Jorge Martins, Ricardo Haddad, Claudia Renata dos Santos Barros, Elaine Cristina Marqueze, Raul Machado Neto, Debora Botequiu Moretti, Bibiana Santos, João Paulo Kitajima, Erika Freitas, David Schlesinger, Simone Kashima, Evandra Strazza Rodrigues, Svetoslav Nanev Slavov, Elaine Vieira dos Santos, Rafael dos Santos Bezerra, Luiz Carlos Junior de Alcantara, Marta Giovanetti, Vagner Fonseca, Flavia Aburjaile, Rodrigo Tocantins Calado. |
| EPI_ISL_1445271                                                                                                                                                                                                                                                                                                                                                     | VIGILANCIA EPIDEMIOLOGICA                                  | Instituto Butantan / Mendelics                                                            | Dimas Tadeu Covas, Sandra Coccuzzo Sampaio, Maria Carolina Elias, José Salvatore Leister Patané, Vincent Louis Viala, Antonio Jorge Martins, Ricardo Haddad, Claudia Renata dos Santos Barros, Elaine Cristina Marqueze, Raul Machado Neto, Debora Botequiu Moretti, Bibiana Santos, João Paulo Kitajima, Erika Freitas, David Schlesinger, Simone Kashima, Evandra Strazza Rodrigues, Svetoslav Nanev Slavov, Elaine Vieira dos Santos, Rafael dos Santos Bezerra, Luiz Carlos Junior de Alcantara, Marta Giovanetti, Vagner Fonseca, Flavia Aburjaile, Rodrigo Tocantins Calado. |
| EPI_ISL_1445274                                                                                                                                                                                                                                                                                                                                                     | AMBULATORIO MEDICO DE ESPECIALIDADES DE PERUIBE            | Instituto Butantan / Mendelics                                                            | Dimas Tadeu Covas, Sandra Coccuzzo Sampaio, Maria Carolina Elias, José Salvatore Leister Patané, Vincent Louis Viala, Antonio Jorge Martins, Ricardo Haddad, Claudia Renata dos Santos Barros, Elaine Cristina Marqueze, Raul Machado Neto, Debora Botequiu Moretti, Bibiana Santos, João Paulo Kitajima, Erika Freitas, David Schlesinger, Simone Kashima, Evandra Strazza Rodrigues, Svetoslav Nanev Slavov, Elaine Vieira dos Santos, Rafael dos Santos Bezerra, Luiz Carlos Junior de Alcantara, Marta Giovanetti, Vagner Fonseca, Flavia Aburjaile, Rodrigo Tocantins Calado. |
| EPI_ISL_1446979                                                                                                                                                                                                                                                                                                                                                     | IL Department of Public Health Chicago Laboratory          | Centers for Disease Control and Prevention Division of Viral Diseases, Pathogen Discovery | Mili Sheth, Sarah Nobles, Jasmine Padilla, Mark Burroughs, Shoshona Le, Katie Dillon, Peter Cook, Clinton R. Paden, Dhvani Batra, Krista Queen, Kristen Knipe, Dakota Howard, Yvette Inoarumhi, Darlene Wagner, Matthew Schmeier, Ben L. Rambo-Martin, Kristine Lacey, Sam Shepard, Alison Laufer Halpin, Dave Wentworth, Vivien Dugan, Suxiang Tong, Justin Lee                                                                                                                                                                                                                   |
| EPI_ISL_1447144                                                                                                                                                                                                                                                                                                                                                     | DOHMH Corona                                               | New York City Public Health Laboratory                                                    | Jade Wang, et al.                                                                                                                                                                                                                                                                                                                                                                                                                                                                                                                                                                  |
| EPI_ISL_1447557, EPI_ISL_1447603, EPI_ISL_1447620                                                                                                                                                                                                                                                                                                                   | Yale Clinical Virology Lab                                 | Grubaugh Lab - Yale School of Public Health                                               | Joseph Fauver, Mallery Breban, Isabel Ott, Tara Alpert, Mary Petrone, Anderson Brito, Chantal Vogels, Annie Watkins, Chaney Kalinich, Jessica Rothman, Marie L. Landry, Nathan Grubaugh                                                                                                                                                                                                                                                                                                                                                                                            |
| EPI_ISL_1447712, EPI_ISL_1447713, EPI_ISL_1447714, EPI_ISL_1447715, EPI_ISL_1447716, EPI_ISL_1447717, EPI_ISL_1447718, EPI_ISL_1447719, EPI_ISL_1447720, EPI_ISL_1447721, EPI_ISL_1447722, EPI_ISL_1447723, EPI_ISL_1447724, EPI_ISL_1447725, EPI_ISL_1447726, EPI_ISL_1447727, EPI_ISL_1447728, EPI_ISL_1447729, EPI_ISL_1447730, EPI_ISL_1447731, EPI_ISL_1447876 | IZSM                                                       | TIGEM                                                                                     | Antonio Grimaldi Patrizia Annunziata Francesco Panariello Biancamaria Pierri Claudia Tiberio Valentina Bouche Chiara Colantuono Maria Concetta Cuomo Denise Di Concilio Lucio Di Filippo Anna Manfredi Marcello Salvi Antonio Limone Luigi Atripaldi Pellegrino Cerino Andrea Ballabio Davide Cacchiarelli                                                                                                                                                                                                                                                                         |
| EPI_ISL_1447987                                                                                                                                                                                                                                                                                                                                                     | 20210300728                                                | TIGEM                                                                                     | Antonio Grimaldi Patrizia Annunziata Francesco Panariello Biancamaria Pierri Claudia Tiberio Valentina Bouche Chiara Colantuono Maria Concetta                                                                                                                                                                                                                                                                                                                                                                                                                                     |



|                                                                                                                                                                                                                                                                                                                                                                                                                                                                                                                                                                                                                                                                                                                                                                                             |                                                                       |                                                                                  |                                                                                                                                                                                                                                                                                                                                                                                                                                                 |
|---------------------------------------------------------------------------------------------------------------------------------------------------------------------------------------------------------------------------------------------------------------------------------------------------------------------------------------------------------------------------------------------------------------------------------------------------------------------------------------------------------------------------------------------------------------------------------------------------------------------------------------------------------------------------------------------------------------------------------------------------------------------------------------------|-----------------------------------------------------------------------|----------------------------------------------------------------------------------|-------------------------------------------------------------------------------------------------------------------------------------------------------------------------------------------------------------------------------------------------------------------------------------------------------------------------------------------------------------------------------------------------------------------------------------------------|
|                                                                                                                                                                                                                                                                                                                                                                                                                                                                                                                                                                                                                                                                                                                                                                                             |                                                                       |                                                                                  | Cuomo Denise Di Concilio Lucio Di Filippo Anna Manfredi Marcello Salvi Antonio Limone Luigi Atripaldi Pellegrino Cerino Andrea Ballabio Davide Cacchiarelli                                                                                                                                                                                                                                                                                     |
| EPI_ISL_1448155, EPI_ISL_1448184                                                                                                                                                                                                                                                                                                                                                                                                                                                                                                                                                                                                                                                                                                                                                            | UW Virology Lab                                                       | UW Virology Lab                                                                  | Pavitra Roychoudhury, Hong Xie, Lasata Shrestha, Shah Mohamed Bakhsh, Michelle Lin, Noah R. Baker, Sean Ellis, Saraswathi Sathees, Meei-Li Huang, Keith R Jerome, Alexander Greninger                                                                                                                                                                                                                                                           |
| EPI_ISL_1448560, EPI_ISL_1448613                                                                                                                                                                                                                                                                                                                                                                                                                                                                                                                                                                                                                                                                                                                                                            | University Hospitals of Geneva, Laboratory of Virology                | HUG, Laboratory of Virology and the Health2030 Genome Center                     | Samuel Cordey, Ana Rita Goncalves, Laurent Kaiser, Lorenzo Cerutti, Henri Pegeot, Melyssa Elies, Deborah Penet, Keith Harshman, Ioannis Xenarios, Emmanouil Dermatzakis                                                                                                                                                                                                                                                                         |
| EPI_ISL_1454248, EPI_ISL_1455639                                                                                                                                                                                                                                                                                                                                                                                                                                                                                                                                                                                                                                                                                                                                                            | Lighthouse Lab in Cambridge                                           | Wellcome Sanger Institute for the COVID-19 Genomics UK (COG-UK) Consortium       | Rob Howes, The Lighthouse Lab in Cambridge and Alex Alderton, Roberto Amato, Jeffrey Barrett, Sonia Goncalves, Ewan Harrison, David K. Jackson, Ian Johnston, Dominic Kwiatkowski, Cordelia Langford, John Sillitoe on behalf of the Wellcome Sanger Institute COVID-19 Surveillance Team                                                                                                                                                       |
| EPI_ISL_1455682                                                                                                                                                                                                                                                                                                                                                                                                                                                                                                                                                                                                                                                                                                                                                                             | Dutch COVID-19 response team                                          | National Institute for Public Health and the Environment (RIVM)                  | Adam Meijer, Harry Vennema, Dirk Eggink, Jeroen Cremer, Sharon van den Brink, Bas van der Veer, AnneMarie van den Brandt, Lisa Wijsman, Kim Frenkis, Ryanne Jaarsma, Eunice Then, Jolienke Hardeman, Lynn Aarts, Sanne Bos, Melissa van Tuil, Robert Kohl, Linda van de Nes, Sjoerd Kuiling, James Groot, Florian Zwagemaker, Dennis Schmitz, Annelies Kroneman, Karim Hajji, Chantal Reusken, on behalf of the national COVID-19 response team |
| EPI_ISL_1456450                                                                                                                                                                                                                                                                                                                                                                                                                                                                                                                                                                                                                                                                                                                                                                             | AZ Klina                                                              | AZ Klina                                                                         | Carl Vael - Lynsey Berckmans                                                                                                                                                                                                                                                                                                                                                                                                                    |
| EPI_ISL_1456631, EPI_ISL_1456632, EPI_ISL_1456633, EPI_ISL_1456634, EPI_ISL_1456635, EPI_ISL_1456636, EPI_ISL_1456637, EPI_ISL_1456638, EPI_ISL_1456639, EPI_ISL_1456640, EPI_ISL_1456641, EPI_ISL_1456642, EPI_ISL_1456643, EPI_ISL_1456644, EPI_ISL_1456645, EPI_ISL_1456646, EPI_ISL_1456647, EPI_ISL_1456648, EPI_ISL_1456649, EPI_ISL_1456650, EPI_ISL_1456651, EPI_ISL_1456652, EPI_ISL_1456653, EPI_ISL_1456654, EPI_ISL_1456655, EPI_ISL_1456656, EPI_ISL_1456657, EPI_ISL_1456658, EPI_ISL_1456659, EPI_ISL_1456660, EPI_ISL_1456661                                                                                                                                                                                                                                               |                                                                       |                                                                                  |                                                                                                                                                                                                                                                                                                                                                                                                                                                 |
| see above                                                                                                                                                                                                                                                                                                                                                                                                                                                                                                                                                                                                                                                                                                                                                                                   | Dutch COVID-19 response team                                          | National Institute for Public Health and the Environment (RIVM)                  | Adam Meijer, Harry Vennema, Dirk Eggink, Jeroen Cremer, Sharon van den Brink, Bas van der Veer, AnneMarie van den Brandt, Lisa Wijsman, Kim Frenkis, Ryanne Jaarsma, Eunice Then, Jolienke Hardeman, Lynn Aarts, Sanne Bos, Melissa van Tuil, Robert Kohl, Linda van de Nes, Sjoerd Kuiling, James Groot, Florian Zwagemaker, Dennis Schmitz, Annelies Kroneman, Karim Hajji, Chantal Reusken, on behalf of the national COVID-19 response team |
| EPI_ISL_1457196, EPI_ISL_1457409, EPI_ISL_1457775, EPI_ISL_1457782                                                                                                                                                                                                                                                                                                                                                                                                                                                                                                                                                                                                                                                                                                                          | AZ Klina                                                              | AZ Klina                                                                         | Carl Vael - Lynsey Berckmans                                                                                                                                                                                                                                                                                                                                                                                                                    |
| EPI_ISL_1464621                                                                                                                                                                                                                                                                                                                                                                                                                                                                                                                                                                                                                                                                                                                                                                             | Ospedale Cristo Re                                                    | INMI Lazzaro Spallanzani IRCCS                                                   | E Giombini, F Messina, M Rueca, G Bonfiglio, O Butera, CEM Gruber, F Santini, B Bartolini, MR Capobianchi, A Di Caro                                                                                                                                                                                                                                                                                                                            |
| EPI_ISL_1464625                                                                                                                                                                                                                                                                                                                                                                                                                                                                                                                                                                                                                                                                                                                                                                             | Ospedale di Genzano - ASL RM 6                                        | INMI Lazzaro Spallanzani IRCCS                                                   | F Santini, B Bartolini, E Giombini, F Messina, M Rueca, G Bonfiglio, O Butera, CEM Gruber, G Tramini, E Conti, MR Capobianchi, A Di Caro                                                                                                                                                                                                                                                                                                        |
| EPI_ISL_1464627, EPI_ISL_1464628, EPI_ISL_1464630, EPI_ISL_1464631, EPI_ISL_1464632, EPI_ISL_1464633, EPI_ISL_1464634, EPI_ISL_1464635, EPI_ISL_1464636, EPI_ISL_1464637, EPI_ISL_1464638, EPI_ISL_1464639, EPI_ISL_1464640, EPI_ISL_1464641, EPI_ISL_1464642, EPI_ISL_1464643, EPI_ISL_1464644, EPI_ISL_1464645, EPI_ISL_1464646, EPI_ISL_1464647, EPI_ISL_1464648, EPI_ISL_1464649, EPI_ISL_1464650, EPI_ISL_1464651, EPI_ISL_1464652, EPI_ISL_1464653, EPI_ISL_1464654, EPI_ISL_1464655, EPI_ISL_1464656, EPI_ISL_1464657, EPI_ISL_1464658, EPI_ISL_1464659, EPI_ISL_1464660, EPI_ISL_1464661, EPI_ISL_1464662, EPI_ISL_1464663, EPI_ISL_1464664, EPI_ISL_1464665, EPI_ISL_1464666, EPI_ISL_1464667, EPI_ISL_1464668, EPI_ISL_1464669, EPI_ISL_1464670, EPI_ISL_1464671, EPI_ISL_1464672 |                                                                       |                                                                                  |                                                                                                                                                                                                                                                                                                                                                                                                                                                 |
| see above                                                                                                                                                                                                                                                                                                                                                                                                                                                                                                                                                                                                                                                                                                                                                                                   | Laboratório de Virologia - UNIFESP                                    | Laboratory of Respiratory Viruses and Measles, Oswaldo Cruz Institute, FIOCRUZ   | Paola Resende, Nancy Beleí, Luciana Appolinario, Fernando Motta, Anna Carolina Paixao, Ana Carolina Mendonca, Alice Sampaio Rocha, Renata Serrano Lopes, Marilda Siqueira on behalf of the Fiocruz COVID-19 Genomic Surveillance Network                                                                                                                                                                                                        |
| EPI_ISL_1465188, EPI_ISL_1465189, EPI_ISL_1465191, EPI_ISL_1465192, EPI_ISL_1465194, EPI_ISL_1465195, EPI_ISL_1465196, EPI_ISL_1465197, EPI_ISL_1465198, EPI_ISL_1465199, EPI_ISL_1465201, EPI_ISL_1465202, EPI_ISL_1465203, EPI_ISL_1465205, EPI_ISL_1465206, EPI_ISL_1465208, EPI_ISL_1465209, EPI_ISL_1465210, EPI_ISL_1465212, EPI_ISL_1465213, EPI_ISL_1465215, EPI_ISL_1465216, EPI_ISL_1465217, EPI_ISL_1465219, EPI_ISL_1465220, EPI_ISL_1465221, EPI_ISL_1465222                                                                                                                                                                                                                                                                                                                   |                                                                       |                                                                                  |                                                                                                                                                                                                                                                                                                                                                                                                                                                 |
| see above                                                                                                                                                                                                                                                                                                                                                                                                                                                                                                                                                                                                                                                                                                                                                                                   | Laboratorio Central de Saude Publica do Estado do Maranhao (LACEN-MA) | Laboratory of Respiratory Viruses and Measles, Oswaldo Cruz Institute, FIOCRUZ   | Paola Resende, Luciana Appolinario, Fernando Motta, Anna Carolina Paixao, Ana Carolina Mendonca, Alice Sampaio Rocha, Renata Serrano Lopes, Lidio Gonçalves Lima Neto, Marilda Siqueira on behalf of the Fiocruz COVID-19 Genomic Surveillance Network                                                                                                                                                                                          |
| EPI_ISL_1465755, EPI_ISL_1465756                                                                                                                                                                                                                                                                                                                                                                                                                                                                                                                                                                                                                                                                                                                                                            | NORTHWELL HEALTH LABORATORIES                                         | Wadsworth Center, New York State Department of Health                            | Kirsten St. George, Daryl M. Lamson, Alexis Russell, Matthew Shudt, Melissa A Leisner, Jonathan Plitnick, Catharine Prussing, Navjot Singh, John Kelly, Erasmus Schneider, Erica Lasek-Nesselquist                                                                                                                                                                                                                                              |
| EPI_ISL_1468413, EPI_ISL_1468414, EPI_ISL_1468415                                                                                                                                                                                                                                                                                                                                                                                                                                                                                                                                                                                                                                                                                                                                           | LACEN do Estado de Goias                                              | Instituto Adolfo Lutz, Interdisciplinary Procedures Center, Strategic Laboratory | Claudio Tavares Sacchi, Claudia Regina Gonçalves, Erica Valessa Ramos Gomes, Karoline Rodrigues Campos, Caio Vinicius Dias Lopes                                                                                                                                                                                                                                                                                                                |
| EPI_ISL_1468416                                                                                                                                                                                                                                                                                                                                                                                                                                                                                                                                                                                                                                                                                                                                                                             | Secretaria Municipal de Saude de Andradina                            | Instituto Adolfo Lutz, Interdisciplinary Procedures Center, Strategic Laboratory | Claudio Tavares Sacchi, Claudia Regina Gonçalves, Erica Valessa Ramos Gomes, Karoline Rodrigues Campos, Caio Vinicius Dias Lopes                                                                                                                                                                                                                                                                                                                |
| EPI_ISL_1468417                                                                                                                                                                                                                                                                                                                                                                                                                                                                                                                                                                                                                                                                                                                                                                             | Santa Casa de Aracatuba Hospital Sagrado Coracao de Jesus             | Instituto Adolfo Lutz, Interdisciplinary Procedures Center, Strategic Laboratory | Claudio Tavares Sacchi, Claudia Regina Gonçalves, Erica Valessa Ramos Gomes, Karoline Rodrigues Campos, Caio Vinicius Dias Lopes                                                                                                                                                                                                                                                                                                                |
| EPI_ISL_1468418                                                                                                                                                                                                                                                                                                                                                                                                                                                                                                                                                                                                                                                                                                                                                                             | Secretaria Municipal de Saude de Birigui                              | Instituto Adolfo Lutz, Interdisciplinary Procedures Center, Strategic Laboratory | Claudio Tavares Sacchi, Claudia Regina Gonçalves, Erica Valessa Ramos Gomes, Karoline Rodrigues Campos, Caio Vinicius Dias Lopes                                                                                                                                                                                                                                                                                                                |
| EPI_ISL_1468419                                                                                                                                                                                                                                                                                                                                                                                                                                                                                                                                                                                                                                                                                                                                                                             | Santa Casa de Aracatuba Hospital Sagrado Coracao de Jesus             | Instituto Adolfo Lutz, Interdisciplinary Procedures Center, Strategic Laboratory | Claudio Tavares Sacchi, Claudia Regina Gonçalves, Erica Valessa Ramos Gomes, Karoline Rodrigues Campos, Caio Vinicius Dias Lopes                                                                                                                                                                                                                                                                                                                |
| EPI_ISL_1468420, EPI_ISL_1468421                                                                                                                                                                                                                                                                                                                                                                                                                                                                                                                                                                                                                                                                                                                                                            | Santa Casa de Birigui                                                 | Instituto Adolfo Lutz, Interdisciplinary Procedures Center, Strategic Laboratory | Claudio Tavares Sacchi, Claudia Regina Gonçalves, Erica Valessa Ramos Gomes, Karoline Rodrigues Campos, Caio Vinicius Dias Lopes                                                                                                                                                                                                                                                                                                                |
| EPI_ISL_1468422, EPI_ISL_1468423                                                                                                                                                                                                                                                                                                                                                                                                                                                                                                                                                                                                                                                                                                                                                            | Penitenciaría Compacta de Avanhandava                                 | Instituto Adolfo Lutz, Interdisciplinary Procedures Center, Strategic Laboratory | Claudio Tavares Sacchi, Claudia Regina Gonçalves, Erica Valessa Ramos Gomes, Karoline Rodrigues Campos, Caio Vinicius Dias Lopes                                                                                                                                                                                                                                                                                                                |
| EPI_ISL_1468424                                                                                                                                                                                                                                                                                                                                                                                                                                                                                                                                                                                                                                                                                                                                                                             | Santa Casa de Aracatuba Hospital Sagrado Coracao de Jesus             | Instituto Adolfo Lutz, Interdisciplinary Procedures Center, Strategic Laboratory | Claudio Tavares Sacchi, Claudia Regina Gonçalves, Erica Valessa Ramos Gomes, Karoline Rodrigues Campos, Caio Vinicius Dias Lopes                                                                                                                                                                                                                                                                                                                |
| EPI_ISL_1468425                                                                                                                                                                                                                                                                                                                                                                                                                                                                                                                                                                                                                                                                                                                                                                             | Santa Casa de Birigui                                                 | Instituto Adolfo Lutz, Interdisciplinary Procedures Center, Strategic Laboratory | Claudio Tavares Sacchi, Claudia Regina Gonçalves, Erica Valessa Ramos Gomes, Karoline Rodrigues Campos, Caio Vinicius Dias Lopes                                                                                                                                                                                                                                                                                                                |
| EPI_ISL_1468426, EPI_ISL_1468427                                                                                                                                                                                                                                                                                                                                                                                                                                                                                                                                                                                                                                                                                                                                                            | Centro de Saude II Matao                                              | Instituto Adolfo Lutz, Interdisciplinary Procedures Center, Strategic Laboratory | Claudio Tavares Sacchi, Claudia Regina Gonçalves, Erica Valessa Ramos Gomes, Karoline Rodrigues Campos, Caio Vinicius Dias Lopes                                                                                                                                                                                                                                                                                                                |
| EPI_ISL_1468428                                                                                                                                                                                                                                                                                                                                                                                                                                                                                                                                                                                                                                                                                                                                                                             | SAE Servico de Atendimento Especializado                              | Instituto Adolfo Lutz, Interdisciplinary Procedures Center, Strategic Laboratory | Claudio Tavares Sacchi, Claudia Regina Gonçalves, Erica Valessa Ramos Gomes, Karoline Rodrigues Campos, Caio Vinicius Dias Lopes                                                                                                                                                                                                                                                                                                                |
| EPI_ISL_1468429, EPI_ISL_1468430                                                                                                                                                                                                                                                                                                                                                                                                                                                                                                                                                                                                                                                                                                                                                            | Centro de Saude II Matao                                              | Instituto Adolfo Lutz, Interdisciplinary Procedures Center, Strategic Laboratory | Claudio Tavares Sacchi, Claudia Regina Gonçalves, Erica Valessa Ramos Gomes, Karoline Rodrigues Campos, Caio Vinicius Dias Lopes                                                                                                                                                                                                                                                                                                                |
| EPI_ISL_1468923, EPI_ISL_1468924, EPI_ISL_1468925, EPI_ISL_1468926, EPI_ISL_1468927, EPI_ISL_1468928, EPI_ISL_1468929, EPI_ISL_1468930, EPI_ISL_1468931, EPI_ISL_1468932, EPI_ISL_1468933, EPI_ISL_1468934, EPI_ISL_1468935, EPI_ISL_1468936, EPI_ISL_1468937, EPI_ISL_1468938, EPI_ISL_1468939, EPI_ISL_1468940, EPI_ISL_1468941, EPI_ISL_1468942, EPI_ISL_1468943, EPI_ISL_1468944, EPI_ISL_1468945, EPI_ISL_1468946, EPI_ISL_1468947                                                                                                                                                                                                                                                                                                                                                     |                                                                       |                                                                                  |                                                                                                                                                                                                                                                                                                                                                                                                                                                 |
| see above                                                                                                                                                                                                                                                                                                                                                                                                                                                                                                                                                                                                                                                                                                                                                                                   | San Diego County Public Health Laboratory                             | Andersen lab at Scripps Research                                                 | SEARCH Alliance San Diego with Tracy Basler, Jovan Shephard, Brett Austin                                                                                                                                                                                                                                                                                                                                                                       |
| EPI_ISL_1469127                                                                                                                                                                                                                                                                                                                                                                                                                                                                                                                                                                                                                                                                                                                                                                             | AZDelta                                                               | AZDelta                                                                          | Geert Martens; Dieter De Smet                                                                                                                                                                                                                                                                                                                                                                                                                   |
| EPI_ISL_1469941                                                                                                                                                                                                                                                                                                                                                                                                                                                                                                                                                                                                                                                                                                                                                                             | LESP Ciudad de Mexico                                                 | Instituto de Diagnostico y Referencia Epidemiologicos (INDRE)                    | Claudia Wong-Arambula, Abril Rodriguez-Maldonado, Vanessa Rivero-Arredondo, Ariadna Medina-Benitez, Joaquin Quiroz-Mercado, Sergio Rangel-Guerrero, Natividad Cruz-Ortiz, Tatiana Nunez-Garcia, Gisela Barrera-Badillo, Lucia Hernandez-Rivas, Irma Lopez-Martinez, Ernesto Ramirez-Gonzalez.                                                                                                                                                   |
| EPI_ISL_1470421, EPI_ISL_1470429, EPI_ISL_1470430, EPI_ISL_1470436, EPI_ISL_1470437, EPI_ISL_1470439, EPI_ISL_1470440, EPI_ISL_1470442, EPI_ISL_1470451, EPI_ISL_1470452, EPI_ISL_1470454, EPI_ISL_1470456, EPI_ISL_1470457, EPI_ISL_1470463, EPI_ISL_1470465, EPI_ISL_1470477, EPI_ISL_1470478, EPI_ISL_1470491, EPI_ISL_1470497, EPI_ISL_1470501, EPI_ISL_1470506, EPI_ISL_1470508, EPI_ISL_1470517, EPI_ISL_1470522, EPI_ISL_1470523, EPI_ISL_1470531, EPI_ISL_1470534, EPI_ISL_1470542, EPI_ISL_1470548, EPI_ISL_1470549, EPI_ISL_1470550, EPI_ISL_1470551, EPI_ISL_1470552, EPI_ISL_1470554, EPI_ISL_1470558                                                                                                                                                                           |                                                                       |                                                                                  |                                                                                                                                                                                                                                                                                                                                                                                                                                                 |
| see above                                                                                                                                                                                                                                                                                                                                                                                                                                                                                                                                                                                                                                                                                                                                                                                   | Genetica Molecular and Subdepartamento de Virologia ISP Chile         | Instituto de Salud Publica de Chile                                              | Javier Tognarelli, Karen Orostica, Barbara Parra, Loredana Arata, Jaime Lagos, Gisselle Barra, Patricia Bustos, Rodrigo Fasce, Andres Castillo, Jorge Fernandez                                                                                                                                                                                                                                                                                 |
| EPI_ISL_1470859, EPI_ISL_1470879,                                                                                                                                                                                                                                                                                                                                                                                                                                                                                                                                                                                                                                                                                                                                                           | Pandemic Response Lab - NYC                                           | Pandemic Response Lab, R&D                                                       | Henry Lee, Michael Hammerling, Melissa Hopkins, Cybill del Castillo, Shinyoung Clair Kang, William Ward, Pradeep Bugga, Sol Rey, Dylan Law, Haiping                                                                                                                                                                                                                                                                                             |

|                                                                                                                                                                                                                                                                                                                                                                                      |                                                                            |                                                                                           |                                                                                                                                                                                                                                                                                                                                                                                                                                                                                                                                                                                                                                                                                                                       |
|--------------------------------------------------------------------------------------------------------------------------------------------------------------------------------------------------------------------------------------------------------------------------------------------------------------------------------------------------------------------------------------|----------------------------------------------------------------------------|-------------------------------------------------------------------------------------------|-----------------------------------------------------------------------------------------------------------------------------------------------------------------------------------------------------------------------------------------------------------------------------------------------------------------------------------------------------------------------------------------------------------------------------------------------------------------------------------------------------------------------------------------------------------------------------------------------------------------------------------------------------------------------------------------------------------------------|
| EPI_ISL_1470898, EPI_ISL_1471160, EPI_ISL_1471230, EPI_ISL_1471500, EPI_ISL_1471828                                                                                                                                                                                                                                                                                                  |                                                                            |                                                                                           | Hao, Jon Laurent                                                                                                                                                                                                                                                                                                                                                                                                                                                                                                                                                                                                                                                                                                      |
| EPI_ISL_1472387, EPI_ISL_1472400                                                                                                                                                                                                                                                                                                                                                     | University Hospitals Translational Laboratory (UHTL), University Hospitals | University Hospitals Translational Laboratory (UHTL), University Hospitals                | Sadri,N., Alouani,D., Song,X.                                                                                                                                                                                                                                                                                                                                                                                                                                                                                                                                                                                                                                                                                         |
| EPI_ISL_1476981, EPI_ISL_1477052, EPI_ISL_1477053, EPI_ISL_1477061                                                                                                                                                                                                                                                                                                                   | Hospital General Universitario Gregorio Marañón                            | Hospital General Universitario Gregorio Marañón                                           | Sergio Buenestado Serrano, Pedro Sola Campoy, Laura Pérez-Lago, Cristina Rodríguez-Grande, Pilar Catalán, Patricia Muñoz, Darío García de Viedma                                                                                                                                                                                                                                                                                                                                                                                                                                                                                                                                                                      |
| EPI_ISL_1478843                                                                                                                                                                                                                                                                                                                                                                      | Microbiology Department. Complexo Hospitalario Universitario de Vigo       | Microbiology Department. Complexo Hospitalario Universitario de Vigo                      | Alfaia N, Alonso I, Alvarez M, Cabrera JJ, Carballo R, Cores O, Cortizo S, del-Campo V, Martinez L, Mediero G, Perez S, Potel C, Regueiro B, Rey S, Vasallo FJ                                                                                                                                                                                                                                                                                                                                                                                                                                                                                                                                                        |
| EPI_ISL_1478879, EPI_ISL_1478906, EPI_ISL_1478920                                                                                                                                                                                                                                                                                                                                    | Illinois Department of Public Health - Springfield Lab                     | Illinois Department of Public Health - Springfield Lab                                    | Bryan Sim, Gordon McCall                                                                                                                                                                                                                                                                                                                                                                                                                                                                                                                                                                                                                                                                                              |
| EPI_ISL_1479113                                                                                                                                                                                                                                                                                                                                                                      | Houston Health Dept.                                                       | Houston Health Dept.                                                                      | Ryker Penn, Pamela Brown, Adolpho Lara, Yanlai Lai                                                                                                                                                                                                                                                                                                                                                                                                                                                                                                                                                                                                                                                                    |
| EPI_ISL_1480020, EPI_ISL_1480124, EPI_ISL_1480193, EPI_ISL_1480204, EPI_ISL_1480211, EPI_ISL_1480288, EPI_ISL_1480289, EPI_ISL_1480420, EPI_ISL_1480437, EPI_ISL_1480453, EPI_ISL_1480464                                                                                                                                                                                            | see above                                                                  | Helix/Illumina                                                                            | Centers for Disease Control and Prevention Division of Viral Diseases, Pathogen Discovery                                                                                                                                                                                                                                                                                                                                                                                                                                                                                                                                                                                                                             |
| EPI_ISL_1481062, EPI_ISL_1481292                                                                                                                                                                                                                                                                                                                                                     | Laboratory Corporation of America                                          | Centers for Disease Control and Prevention Division of Viral Diseases, Pathogen Discovery | Dakota Howard, Dhvani Batra, Peter W. Cook, Kara Moser, Adrian Paskey, Jason Caravas, Benjamin Rambo-Martin, Shatavia Morrison, Christopher Gulvick, Scott Sammons, Yvette Unoarumhi, Darlene Wagner, Matthew Schmeer, Eileen de Feo, Jan Antico, Christine Tran, Matthew Tolentino, Shannon Wickline, Kim Gietzen, Brad Sickler, Jingtao Liu, Eric Allen, Phil Febbo, Nicole L. Washington, Simon White, Geraint Levan, Kelly Schiabor Barrett, Elizabeth Cirulli, Alexandre Bolze, Ary Ascencio, Charlotte Rivera-Garcia, Ryan Cho, Jason Nguyen, Sherry Wang, Jimmy Ramirez, Tyler Cassens, Efen Sandoval, Magnus Isaksson, William Lee, David Becker, Marc Laurent, James Lu, Clinton R. Paden, Duncan MacCannell |
| EPI_ISL_1482647                                                                                                                                                                                                                                                                                                                                                                      | Oregon State Public Health Laboratory                                      | Oregon State Public Health Laboratory                                                     | Rafia Razaque, Eugene Yeboah, Vanda Makris, Laura Tsaknaridis, John Fontana and Shane Sevey                                                                                                                                                                                                                                                                                                                                                                                                                                                                                                                                                                                                                           |
| EPI_ISL_1482931                                                                                                                                                                                                                                                                                                                                                                      | MUSC Molecular Pathology Laboratory                                        | MUSC Molecular Pathology Laboratory                                                       | Julie W. Hirschhorn, W. Bailey Glen Jr, Dariusz Pytel, Jaclyn Dunne, Kristen Maurer, Frederick S. Nolte                                                                                                                                                                                                                                                                                                                                                                                                                                                                                                                                                                                                               |
| EPI_ISL_1483098, EPI_ISL_1483099                                                                                                                                                                                                                                                                                                                                                     | Utah Public Health Laboratory                                              | Utah Public Health Laboratory                                                             | Erin L. Young, Kelly F. Oakeson, Tara Gallagher                                                                                                                                                                                                                                                                                                                                                                                                                                                                                                                                                                                                                                                                       |
| EPI_ISL_1483589                                                                                                                                                                                                                                                                                                                                                                      | Alaska State Virology Laboratory                                           | Alaska State Virology Laboratory                                                          | Stephanie DeRonde, Elva House, Lisa Smith, Ph.D., Jack Chen, Ph.D.                                                                                                                                                                                                                                                                                                                                                                                                                                                                                                                                                                                                                                                    |
| EPI_ISL_1483773                                                                                                                                                                                                                                                                                                                                                                      | Centre Hospitalier Universitaire Clermont-Ferrand                          | CHU Clermont-Ferrand, service de virologie                                                | Bisseux Maxime, Mirand Audrey, Combes Patricia, Henquell Cécile                                                                                                                                                                                                                                                                                                                                                                                                                                                                                                                                                                                                                                                       |
| EPI_ISL_1490863, EPI_ISL_1490895                                                                                                                                                                                                                                                                                                                                                     | UW Virology Lab                                                            | UW Virology Lab                                                                           | Pavitra Roychoudhury, Hong Xie, Lasata Shrestha, Shah Mohamed Bakhsh, Michelle Lin, Noah R. Baker, Sean Ellis, Saraswathi Sathees, Meei-Li Huang, Keith R Jerome, Alexander Greninger                                                                                                                                                                                                                                                                                                                                                                                                                                                                                                                                 |
| EPI_ISL_1491429, EPI_ISL_1491508                                                                                                                                                                                                                                                                                                                                                     | University of Michigan Clinical Microbiology Laboratory                    | Lauring Lab, University of Michigan, Department of Microbiology and Immunology            | Valesano                                                                                                                                                                                                                                                                                                                                                                                                                                                                                                                                                                                                                                                                                                              |
| EPI_ISL_1492564                                                                                                                                                                                                                                                                                                                                                                      | Ospedale F.Spaziani                                                        | INMI Lazzaro Spallanzani IRCCS                                                            | G Bonfiglio, O Butera, CEM Gruber, F Santini, B Bartolini, E Giombini, F Messina, M Rueca, R Pulselli, G Brocco, C Gargiulo, A Di Caro, MR Capobianchi                                                                                                                                                                                                                                                                                                                                                                                                                                                                                                                                                                |
| EPI_ISL_1492571                                                                                                                                                                                                                                                                                                                                                                      | Ospedale San Filippo Neri                                                  | INMI Lazzaro Spallanzani IRCCS                                                            | G Bonfiglio, O Butera, CEM Gruber, F Santini, B Bartolini, E Giombini, F Messina, M Rueca, M Meledandri, ML Schiavone, A Tamburro, A Di Caro, MR Capobianchi                                                                                                                                                                                                                                                                                                                                                                                                                                                                                                                                                          |
| EPI_ISL_1492573                                                                                                                                                                                                                                                                                                                                                                      | Azienda Ospedaliera San Giovanni Addolorata                                | INMI Lazzaro Spallanzani IRCCS                                                            | G Bonfiglio, O Butera, CEM Gruber, F Santini, B Bartolini, E Giombini, F Messina, M Rueca, M Gaudio, PM Placanica, A Di Caro, MR Capobianchi                                                                                                                                                                                                                                                                                                                                                                                                                                                                                                                                                                          |
| EPI_ISL_1492716, EPI_ISL_1492774, EPI_ISL_1492827                                                                                                                                                                                                                                                                                                                                    | SYNLAB                                                                     | GIGA Medical Genomics                                                                     | Keith Durkin, Maria Artesi, Sébastien Bontems, Raphaël Boreux, Bouchra Boujemla, Nathalie Renotte, Cécile Meex, Pierrette Melin, Marie-Pierre Hayette, Vincent Bours                                                                                                                                                                                                                                                                                                                                                                                                                                                                                                                                                  |
| EPI_ISL_1492839                                                                                                                                                                                                                                                                                                                                                                      | Department of Clinical Microbiology                                        | GIGA Medical Genomics                                                                     | Keith Durkin, Maria Artesi, Sébastien Bontems, Raphaël Boreux, Bouchra Boujemla, Nathalie Renotte, Cécile Meex, Pierrette Melin, Marie-Pierre Hayette, Vincent Bours                                                                                                                                                                                                                                                                                                                                                                                                                                                                                                                                                  |
| EPI_ISL_1492989                                                                                                                                                                                                                                                                                                                                                                      | University of Liège COVID-19 testing center                                | GIGA Medical Genomics                                                                     | Keith Durkin, Maria Artesi, Sébastien Bontems, Raphaël Boreux, Bouchra Boujemla, Nathalie Renotte, Cécile Meex, Pierrette Melin, Marie-Pierre Hayette, Vincent Bours                                                                                                                                                                                                                                                                                                                                                                                                                                                                                                                                                  |
| EPI_ISL_1493499, EPI_ISL_1493500, EPI_ISL_1493501, EPI_ISL_1493553                                                                                                                                                                                                                                                                                                                   | Aegis Sciences Corporation                                                 | Centers for Disease Control and Prevention Division of Viral Diseases, Pathogen Discovery | Dakota Howard, Dhvani Batra, Peter W. Cook, Kara Moser, Adrian Paskey, Jason Caravas, Benjamin Rambo-Martin, Shatavia Morrison, Christopher Gulvick, Scott Sammons, Yvette Unoarumhi, Darlene Wagner, Matthew Schmeer, Cyndi Clark, Patrick Campbell, Rob Case, Vikramsinha Ghorpade, Holly Houdeshell, Ola Kvalvaag, Dillon Nall, Ethan Sanders, Alec Vest, Shaun Westlund, Matthew Hardison, Clinton R. Paden, Duncan MacCannell                                                                                                                                                                                                                                                                                    |
| EPI_ISL_1493573, EPI_ISL_1493574, EPI_ISL_1493575, EPI_ISL_1493576, EPI_ISL_1493577                                                                                                                                                                                                                                                                                                  | LACEN do Estado de Goias                                                   | Instituto Adolfo Lutz, Interdisciplinary Procedures Center, Strategic Laboratory          | Claudio Tavares Sacchi, Claudia Regina Gonçalves, Erica Valessa Ramos Gomes, Karoline Rodrigues Campos, Caio Vinicius Dias Lopes                                                                                                                                                                                                                                                                                                                                                                                                                                                                                                                                                                                      |
| EPI_ISL_1493578, EPI_ISL_1493579                                                                                                                                                                                                                                                                                                                                                     | LACEN do Estado de Rondonia                                                | Instituto Adolfo Lutz, Interdisciplinary Procedures Center, Strategic Laboratory          | Claudio Tavares Sacchi, Claudia Regina Gonçalves, Erica Valessa Ramos Gomes, Karoline Rodrigues Campos, Caio Vinicius Dias Lopes                                                                                                                                                                                                                                                                                                                                                                                                                                                                                                                                                                                      |
| EPI_ISL_1493580                                                                                                                                                                                                                                                                                                                                                                      | CS II Dr Miguel Vitaliano Orlandia                                         | Instituto Adolfo Lutz, Interdisciplinary Procedures Center, Strategic Laboratory          | Claudio Tavares Sacchi, Claudia Regina Gonçalves, Erica Valessa Ramos Gomes, Karoline Rodrigues Campos, Caio Vinicius Dias Lopes                                                                                                                                                                                                                                                                                                                                                                                                                                                                                                                                                                                      |
| EPI_ISL_1493581                                                                                                                                                                                                                                                                                                                                                                      | Sae servico de Atendimento Especializado                                   | Instituto Adolfo Lutz, Interdisciplinary Procedures Center, Strategic Laboratory          | Claudio Tavares Sacchi, Claudia Regina Gonçalves, Erica Valessa Ramos Gomes, Karoline Rodrigues Campos, Caio Vinicius Dias Lopes                                                                                                                                                                                                                                                                                                                                                                                                                                                                                                                                                                                      |
| EPI_ISL_1493582                                                                                                                                                                                                                                                                                                                                                                      | CS II Dr Miguel Vitaliano Orlandia                                         | Instituto Adolfo Lutz, Interdisciplinary Procedures Center, Strategic Laboratory          | Claudio Tavares Sacchi, Claudia Regina Gonçalves, Erica Valessa Ramos Gomes, Karoline Rodrigues Campos, Caio Vinicius Dias Lopes                                                                                                                                                                                                                                                                                                                                                                                                                                                                                                                                                                                      |
| EPI_ISL_1493791, EPI_ISL_1493886                                                                                                                                                                                                                                                                                                                                                     | Helix/Illumina                                                             | Centers for Disease Control and Prevention Division of Viral Diseases, Pathogen Discovery | Dakota Howard, Dhvani Batra, Peter W. Cook, Kara Moser, Adrian Paskey, Jason Caravas, Benjamin Rambo-Martin, Shatavia Morrison, Christopher Gulvick, Scott Sammons, Yvette Unoarumhi, Darlene Wagner, Matthew Schmeer, Eileen de Feo, Jan Antico, Christine Tran, Matthew Tolentino, Shannon Wickline, Kim Gietzen, Brad Sickler, Jingtao Liu, Eric Allen, Phil Febbo, Nicole L. Washington, Simon White, Geraint Levan, Kelly Schiabor Barrett, Elizabeth Cirulli, Alexandre Bolze, Ary Ascencio, Charlotte Rivera-Garcia, Ryan Cho, Jason Nguyen, Sherry Wang, Jimmy Ramirez, Tyler Cassens, Efen Sandoval, Magnus Isaksson, William Lee, David Becker, Marc Laurent, James Lu, Clinton R. Paden, Duncan MacCannell |
| EPI_ISL_1494923                                                                                                                                                                                                                                                                                                                                                                      | CS II Dr Jose Ferreira Telles                                              | Instituto Adolfo Lutz, Interdisciplinary Procedures Center, Strategic Laboratory          | Claudio Tavares Sacchi, Claudia Regina Gonçalves, Erica Valessa Ramos Gomes, Karoline Rodrigues Campos, Caio Vinicius Dias Lopes                                                                                                                                                                                                                                                                                                                                                                                                                                                                                                                                                                                      |
| EPI_ISL_1494924                                                                                                                                                                                                                                                                                                                                                                      | LACEN do Estado de Rondonia                                                | Instituto Adolfo Lutz, Interdisciplinary Procedures Center, Strategic Laboratory          | Claudio Tavares Sacchi, Claudia Regina Gonçalves, Erica Valessa Ramos Gomes, Karoline Rodrigues Campos, Caio Vinicius Dias Lopes                                                                                                                                                                                                                                                                                                                                                                                                                                                                                                                                                                                      |
| EPI_ISL_1494977, EPI_ISL_1494986, EPI_ISL_1494989, EPI_ISL_1494994, EPI_ISL_1494998, EPI_ISL_1495005, EPI_ISL_1495010, EPI_ISL_1495011, EPI_ISL_1495014, EPI_ISL_1495015, EPI_ISL_1495016, EPI_ISL_1495019, EPI_ISL_1495020, EPI_ISL_1495021, EPI_ISL_1495022, EPI_ISL_1495023, EPI_ISL_1495024, EPI_ISL_1495025, EPI_ISL_1495026, EPI_ISL_1495031, EPI_ISL_1495035, EPI_ISL_1495038 | see above                                                                  | Laboratório de Biologia Integrativa                                                       | Filipe Romero Rebello Moreira, Diego Menezes Bonfim, Victor Emmanuel Viana Geddes, Danielle Alves Gomes Zauli, Joice do Prado Silva, Aline Brito de Lima, Frederico Scott Varella Malta, Alessandro Clayton de Souza Ferreira, Victor Cavalcanti Pardini, Daniel Costa Queiroz, Rafael Marques de Souza,                                                                                                                                                                                                                                                                                                                                                                                                              |

|                                                                                                                                                                                                                                                               |                                                                                                                    |                                                                                                                    |                                                                                                                                                                                                                                                                                     |
|---------------------------------------------------------------------------------------------------------------------------------------------------------------------------------------------------------------------------------------------------------------|--------------------------------------------------------------------------------------------------------------------|--------------------------------------------------------------------------------------------------------------------|-------------------------------------------------------------------------------------------------------------------------------------------------------------------------------------------------------------------------------------------------------------------------------------|
| EPI_ISL_1497853, EPI_ISL_1497872, EPI_ISL_1497879, EPI_ISL_1497884, EPI_ISL_1497886, EPI_ISL_1497945, EPI_ISL_1497947, EPI_ISL_1498029, EPI_ISL_1498033                                                                                                       | UW Virology Lab                                                                                                    | UW Virology Lab                                                                                                    | Lucyene Miguita Luiz, Paula Luize Camargos Fonseca, Rennan Garcias Moreira, Nuno Rodrigues Faria, Carolina Moreira Voloch, Renan Pedra de Souza, Renato Santana Aguiar                                                                                                              |
| EPI_ISL_1498298, EPI_ISL_1498299                                                                                                                                                                                                                              | Platform BIS UZA/UAntwerpen                                                                                        | UAntwerp, Laboratory of Medical Microbiology                                                                       | Basil Britto Xavier, Jasmine Coppens, Marie Le Mercier, Christine Lammens, Veerle Matheussen, Herman Goossens                                                                                                                                                                       |
| EPI_ISL_1498358, EPI_ISL_1498359, EPI_ISL_1498360, EPI_ISL_1498361, EPI_ISL_1498362, EPI_ISL_1498363, EPI_ISL_1498364, EPI_ISL_1498365, EPI_ISL_1498366, EPI_ISL_1498367, EPI_ISL_1498368, EPI_ISL_1498369, EPI_ISL_1498370, EPI_ISL_1498371, EPI_ISL_1498372 | Platform BIS UZA/UAntwerpen                                                                                        | Labo Klinische Biologie, UZA                                                                                       | Jasmine Coppens, Marie Le Mercier, Basil Britto Xavier, Christine Lammens, Veerle Matheussen, Herman Goossens                                                                                                                                                                       |
| see above                                                                                                                                                                                                                                                     | University Hospital Antwerp (UZA), Drie Eikenstraat 655, 2650 Edegem, Belgium                                      | Labo Klinische Biologie, UZA                                                                                       | Jasmine Coppens, Marie Le Mercier, Basil Britto Xavier, Christine Lammens, Veerle Matheussen, Herman Goossens                                                                                                                                                                       |
| EPI_ISL_1498380                                                                                                                                                                                                                                               | Associação Fundo de Incentivo à Pesquisa (AFIP).                                                                   | Associação Fundo de Incentivo à Pesquisa (AFIP).                                                                   | Priscila Farias Tempaku, Juliana Nogueira Martins Rodrigues, Erika Rodrigues de Oliveira, Debora R. Ramadan, Soraya Sgambatti de Andrade, Sergio Tufik.                                                                                                                             |
| EPI_ISL_1498916                                                                                                                                                                                                                                               | Associação Fundo de Incentivo à Pesquisa (AFIP)                                                                    | Associação Fundo de Incentivo à Pesquisa (AFIP)                                                                    | Priscila Farias Tempaku, Juliana Nogueira Martins Rodrigues, Erika Rodrigues de Oliveira, Debora R. Ramadan, Soraya Sgambatti de Andrade, Sergio Tufik.                                                                                                                             |
| EPI_ISL_1498917                                                                                                                                                                                                                                               | Hospital Estadual de Mirandópolis                                                                                  | Instituto Adolfo Lutz, Interdisciplinary Procedures Center, Strategic Laboratory                                   | Claudio Tavares Sacchi, Claudia Regina Gonçalves, Erica Valessa Ramos Gomes, Karoline Rodrigues Campos, Caio Vinicius Dias Lopes                                                                                                                                                    |
| EPI_ISL_1499105                                                                                                                                                                                                                                               | Associação Fundo de Incentivo à Pesquisa (AFIP)                                                                    | Associação Fundo de Incentivo à Pesquisa (AFIP)                                                                    | Priscila Farias Tempaku, Juliana Nogueira Martins Rodrigues, Erika Rodrigues de Oliveira, Debora R. Ramadan, Soraya Sgambatti de Andrade, Sergio Tufik.                                                                                                                             |
| EPI_ISL_1499475, EPI_ISL_1499476, EPI_ISL_1499483, EPI_ISL_1499488, EPI_ISL_1499489, EPI_ISL_1499490, EPI_ISL_1499492, EPI_ISL_1499500                                                                                                                        | Azienda Ospedaliera Terni                                                                                          | Istituto Zooprofilattico Sperimentale dell'Abruzzo e Molise *G. Caporale*                                          | Palumbo M, Scaccetti A, Lorusso A, Marcacci M, Di Domenico M, Ancora M, Curini V, Di Lollo V, Delli Compagni E, Mangone I, Rinaldi A, Scialabba S, Caporale M, Di Pasquale A, Cammà C, Puglia I, Calistri P, Savini G                                                               |
| EPI_ISL_1499576, EPI_ISL_1499577, EPI_ISL_1499585, EPI_ISL_1499588                                                                                                                                                                                            | unknown                                                                                                            | Instituto Nacional de Saude (INSA)                                                                                 | Borges et al                                                                                                                                                                                                                                                                        |
| EPI_ISL_1499628, EPI_ISL_1499629, EPI_ISL_1499632, EPI_ISL_1499635, EPI_ISL_1499639, EPI_ISL_1499640                                                                                                                                                          | Università degli Studi di Perugia                                                                                  | Istituto Zooprofilattico Sperimentale dell'Abruzzo e Molise *G. Caporale*                                          | Mencacci A, Camilioni B, Lorusso A, Marcacci M, Di Domenico M, Ancora M, Curini V, Di Lollo Valeria, Mangone I, Rinaldi A, Delli Compagni E, Scialabba S, Caporale M, Di Pasquale A, Cammà C, Puglia I, Calistri P, Savini G                                                        |
| EPI_ISL_1499645, EPI_ISL_1499646, EPI_ISL_1499647, EPI_ISL_1499648, EPI_ISL_1499649, EPI_ISL_1499650, EPI_ISL_1499651                                                                                                                                         | Laboratorio Analisi Osp. Città di Castello - Azienda USL Umbria1                                                   | Istituto Zooprofilattico Sperimentale dell'Abruzzo e Molise *G. Caporale*                                          | Malagigi V, Tacconi P, Lorusso A, Marcacci M, Di Domenico M, Ancora M, Curini V, Di Lollo Valeria, Mangone I, Rinaldi A, Delli Compagni E, Scialabba S, Caporale M, Di Pasquale A, Cammà C, Puglia I, Calistri P, Savini G                                                          |
| EPI_ISL_1499762, EPI_ISL_1499806, EPI_ISL_1499807, EPI_ISL_1499863, EPI_ISL_1499895, EPI_ISL_1499924                                                                                                                                                          | National Virus Reference Laboratory                                                                                | National Virus Reference Laboratory                                                                                | Zoe Yandle, Charlene Bennet, Gabriel Gonzalez, Michael Carr, Jonathan Dean, Cillian F De Gascun                                                                                                                                                                                     |
| EPI_ISL_1500158, EPI_ISL_1500175, EPI_ISL_1500177, EPI_ISL_1500184, EPI_ISL_1500221, EPI_ISL_1500223, EPI_ISL_1500224, EPI_ISL_1500225, EPI_ISL_1500233, EPI_ISL_1500243                                                                                      | Illinois Department of Public Health - Springfield Lab                                                             | Illinois Department of Public Health - Springfield Lab                                                             | Bryan Sim, Gordon McCall                                                                                                                                                                                                                                                            |
| EPI_ISL_1500427, EPI_ISL_1500428, EPI_ISL_1500429                                                                                                                                                                                                             | UOC Microbiologia e Virologia, Azienda Ospedaliera Universitaria Senese, Siena, Italy                              | Dipartimento di Biotecnologie Mediche                                                                              | Maria Grazia Cusi, David Pinzauti, Claudia Gandolfo, Gabriele Anichini, Gianni Pozzi, Gianni Gori Savellini, Francesco Santoro                                                                                                                                                      |
| EPI_ISL_1501135, EPI_ISL_1501265                                                                                                                                                                                                                              | Broussais                                                                                                          | HEGP - Laboratoire de Virologie                                                                                    | David Veyer                                                                                                                                                                                                                                                                         |
| EPI_ISL_1502021, EPI_ISL_1502027, EPI_ISL_1502040                                                                                                                                                                                                             | Lurie Children's Hospital of Chicago                                                                               | Northwestern University - Ozer Lab                                                                                 | Ramon Lorenzo-Redondo, Lacy M. Simons, Taylor J. Dean, Michael G. Ison, Xiaotian, Zheng, William J. Muller, Larry K. Kocielek, Judd F. Hultquist, Egon A. Ozer                                                                                                                      |
| EPI_ISL_1502062                                                                                                                                                                                                                                               | Northwestern Memorial Hospital                                                                                     | Northwestern University - Ozer Lab                                                                                 | Ramon Lorenzo-Redondo, Lacy M. Simons, Taylor J. Dean, Chad J. Achenbach, Lawrence J. Jennings, Chao Qi, Michael G. Ison, Judd F. Hultquist, Egon A. Ozer                                                                                                                           |
| EPI_ISL_1502478                                                                                                                                                                                                                                               | DIP. PREV. AVEZZANO SERVIZIO DI IGIENE EPIDEMIOLOGIA E SANITA' PUBBLICA AVEZZANO(L'AQUILA)                         | Istituto Zooprofilattico Sperimentale dell'Abruzzo e Molise *G. Caporale*                                          | Lorusso A, Marcacci M, Di Domenico M, Ancora M, Curini V, Di Lollo Valeria, Mangone I, Rinaldi A, Delli Compagni E, Scialabba S, Caporale M, Di Pasquale A, Cammà C, Puglia I, Calistri P, Savini G                                                                                 |
| EPI_ISL_792680, EPI_ISL_792681, EPI_ISL_792682, EPI_ISL_792683                                                                                                                                                                                                | Pathogen Genomics Center, National Institute of Infectious Diseases                                                | Pathogen Genomics Center, National Institute of Infectious Diseases                                                | Tsuyoshi Sekizuka, Kentaro Itokawa, Rina Tanaka, Masanori Hashino, Makoto Kuroda                                                                                                                                                                                                    |
| EPI_ISL_811149                                                                                                                                                                                                                                                | Laboratorio de Ecologia de Doencas Transmissíveis na Amazonia, Instituto Leonidas e Maria Deane - Fiocruz Amazonia | Laboratorio de Ecologia de Doencas Transmissíveis na Amazonia, Instituto Leonidas e Maria Deane - Fiocruz Amazonia | Valdinete Nascimento, Victor Souza, André Corado, Fernanda Nascimento, George Silva, Ágatha Costa, Debora Duarte, Luciana Gonçalves, Matilde Mejia, Karina Pessoa, Maria Júlia Brandão, Michele Jesus, Felipe Naveca on behalf of the Fiocruz COVID-19 Genomic Surveillance Network |
| EPI_ISL_833136, EPI_ISL_833137, EPI_ISL_833138, EPI_ISL_833139, EPI_ISL_833140                                                                                                                                                                                | Laboratorio de Ecologia de Doencas Transmissíveis na Amazonia, Instituto Leonidas e Maria Deane - Fiocruz Amazonia | Laboratorio de Ecologia de Doencas Transmissíveis na Amazonia, Instituto Leonidas e Maria Deane - Fiocruz Amazonia | Valdinete Nascimento, Victor Souza, André Corado, Fernanda Nascimento, George Silva, Ágatha Costa, Debora Duarte, Karina Pessoa, Matilde Mejia, Luciana Gonçalves, Maria Júlia Brandão, Michele Jesus, Felipe Naveca on behalf of the Fiocruz COVID-19 Genomic Surveillance Network |
| EPI_ISL_833167, EPI_ISL_833169, EPI_ISL_833170, EPI_ISL_833171, EPI_ISL_833172, EPI_ISL_833173, EPI_ISL_833174                                                                                                                                                | DB Diagnosticos do Brasil                                                                                          | Instituto Adolfo Lutz, Interdisciplinary Procedures Center, Strategic Laboratory                                   | Claudio Tavares Sacchi, Claudia Regina Gonçalves, Erica Valessa Ramos Gomes, Karoline Rodrigues Campos                                                                                                                                                                              |
| EPI_ISL_854594                                                                                                                                                                                                                                                | Faroese National Reference Laboratory for Fish and Animal Diseases                                                 | Faroese National Reference Laboratory for Fish and Animal Diseases                                                 | Maria Marjunardóttir Dahl, Petra Elisabeth Petersen, Arnfinnur Kallsberg Junior, Debes Hammershaimb Christiansen                                                                                                                                                                    |
| EPI_ISL_872191, EPI_ISL_872192                                                                                                                                                                                                                                | Conjunto Hospitalar do Mandaqui de Sao Paulo                                                                       | Instituto Adolfo Lutz, Interdisciplinary Procedures Center, Strategic Laboratory                                   | Claudio Tavares Sacchi, Claudia Regina Gonçalves, Erica Valessa Ramos Gomes, Karoline Rodrigues Campos, Katia Correa de Oliveira Santos, Ana Lucia de Carvalho Avelino, Fabiana Cristina Pereira dos Santos                                                                         |
| EPI_ISL_873257                                                                                                                                                                                                                                                | M Health Fairview                                                                                                  | Minnesota Department of Health, Public Health Laboratory                                                           | Alexandra Lorentz, Jacob Garfin, Matt Plumb, and Xiong Wang                                                                                                                                                                                                                         |
| EPI_ISL_875566, EPI_ISL_875567, EPI_ISL_875568                                                                                                                                                                                                                | SIESP L'AQUILA                                                                                                     | Istituto Zooprofilattico Sperimentale dell'Abruzzo e Molise *G. Caporale*                                          | Lorusso A, Marcacci M, Di Domenico M, Ancora M, Curini V, Mangone I, Rinaldi A, Scialabba S, Di Pasquale A, Cammà C, Puglia I, Calistri P, Savini G                                                                                                                                 |
| EPI_ISL_875688                                                                                                                                                                                                                                                | National Influenza Center - Instituto Adolfo Lutz                                                                  | Instituto Adolfo Lutz, Interdisciplinary Procedures Center, Strategic Laboratory                                   | Claudio Tavares Sacchi, Claudia Regina Gonçalves, Erica Valessa Ramos Gomes, Karoline Rodrigues Campos, Katia Correa de Oliveira Santos, Ana Lucia de Carvalho Avelino, Clovis Roberto Abe Constantino                                                                              |
| EPI_ISL_875689                                                                                                                                                                                                                                                | Hospital do Servidor Publico                                                                                       | Instituto Adolfo Lutz, Interdisciplinary Procedures Center,                                                        | Claudio Tavares Sacchi, Claudia Regina Gonçalves, Erica Valessa Ramos Gomes, Karoline Rodrigues Campos                                                                                                                                                                              |

|                                                                                                                                                                                                                                                |                                                                                                      | Strategic Laboratory                                                                                             |                                                                                                                                                                                                                                                                                                                                            |
|------------------------------------------------------------------------------------------------------------------------------------------------------------------------------------------------------------------------------------------------|------------------------------------------------------------------------------------------------------|------------------------------------------------------------------------------------------------------------------|--------------------------------------------------------------------------------------------------------------------------------------------------------------------------------------------------------------------------------------------------------------------------------------------------------------------------------------------|
| EPI_ISL_904120, EPI_ISL_904121<br>EPI_ISL_906068, EPI_ISL_906069                                                                                                                                                                               | LACEN - Laboratório Central de Saúde Pública do Pará<br>Instituto Adolfo Lutz - Regional de Campinas | Evandro Chagas Institute<br>Instituto Adolfo Lutz, Interdisciplinary Procedures Center,<br>Strategic Laboratory  | Santos, M.C.; Silva, A.M.; Junior, W.D.C.; Barbagelata, L.S.; Ferreira, J.A.; Sousa, E.M.A.; da Silva, P.S.; Pinheiro, K.C.; L.C.; Sousa Junior, E.C.<br>Claudio Tavares Sacchi, Claudia Regina Gonçalves, Erica Valessa Ramos Gomes, Karoline Rodrigues Campos                                                                            |
| EPI_ISL_906071                                                                                                                                                                                                                                 | LACEN-PI DR. Costa Alvarenga                                                                         | Instituto Adolfo Lutz, Interdisciplinary Procedures Center,<br>Strategic Laboratory                              | Claudio Tavares Sacchi, Claudia Regina Gonçalves, Erica Valessa Ramos Gomes, Karoline Rodrigues Campos                                                                                                                                                                                                                                     |
| EPI_ISL_906075                                                                                                                                                                                                                                 | Hospital Geral de Vila Penteadou Dr Jose Pangella Sao Paulo                                          | Instituto Adolfo Lutz, Interdisciplinary Procedures Center,<br>Strategic Laboratory                              | Claudio Tavares Sacchi, Claudia Regina Gonçalves, Erica Valessa Ramos Gomes, Karoline Rodrigues Campos                                                                                                                                                                                                                                     |
| EPI_ISL_906076, EPI_ISL_906077                                                                                                                                                                                                                 | Hospital Sao Luiz Sao Caetano                                                                        | Instituto Adolfo Lutz, Interdisciplinary Procedures Center,<br>Strategic Laboratory                              | Claudio Tavares Sacchi, Claudia Regina Gonçalves, Erica Valessa Ramos Gomes, Karoline Rodrigues Campos                                                                                                                                                                                                                                     |
| EPI_ISL_906080, EPI_ISL_906081                                                                                                                                                                                                                 | Hospital Beneficiencia Portuguesa                                                                    | Instituto Adolfo Lutz, Interdisciplinary Procedures Center,<br>Strategic Laboratory                              | Claudio Tavares Sacchi, Claudia Regina Gonçalves, Erica Valessa Ramos Gomes, Karoline Rodrigues Campos                                                                                                                                                                                                                                     |
| EPI_ISL_913587                                                                                                                                                                                                                                 | Vault Health                                                                                         | Minnesota Department of Health, Public Health Laboratory                                                         | Alexandra Lorentz, Jacob Garfin, Matt Plumb, and Xiong Wang                                                                                                                                                                                                                                                                                |
| EPI_ISL_918499, EPI_ISL_918500, EPI_ISL_918501, EPI_ISL_918502, EPI_ISL_918503, EPI_ISL_918504, EPI_ISL_918505, EPI_ISL_918506, EPI_ISL_918507, EPI_ISL_918508, EPI_ISL_918509, EPI_ISL_918510, EPI_ISL_918511                                 | LACEN - Laboratório Central de Saúde Pública do Amazonas<br>see above                                | Evandro Chagas Institute                                                                                         | Santos, M.C.; Silva, A.M.; Junior, W.D.C.; Barbagelata, L.S.; Ferreira, J.A.; Sousa, E.M.A.; da Silva, P.S.; Pinheiro, K.C.; L.C.; Sousa Junior, E.C.                                                                                                                                                                                      |
| EPI_ISL_925031, EPI_ISL_925032                                                                                                                                                                                                                 | Mirialis                                                                                             | CNR Virus des Infections Respiratoires - France SUD                                                              | Antonin Bal, Gregory Destras, Gwendolynne Burfin, Hadrien Règue, Quentin Semanas, Martine Valette, Bruno Lina, Laurence Josset                                                                                                                                                                                                             |
| EPI_ISL_940614, EPI_ISL_940615,<br>EPI_ISL_940616, EPI_ISL_940617,<br>EPI_ISL_940618                                                                                                                                                           | LACEN-PI DR. Costa Alvarenga                                                                         | Instituto Adolfo Lutz, Interdisciplinary Procedures Center,<br>Strategic Laboratory                              | Claudio Tavares Sacchi, Claudia Regina Gonçalves, Erica Valessa Ramos Gomes, Karoline Rodrigues Campos                                                                                                                                                                                                                                     |
| EPI_ISL_940619, EPI_ISL_940620,<br>EPI_ISL_940621, EPI_ISL_940622,<br>EPI_ISL_940623, EPI_ISL_940624,<br>EPI_ISL_940625                                                                                                                        | Hospital Sao Joaquim - Beneficiencia Portuguesa                                                      | Instituto Adolfo Lutz, Interdisciplinary Procedures Center,<br>Strategic Laboratory                              | Claudio Tavares Sacchi, Claudia Regina Gonçalves, Erica Valessa Ramos Gomes, Karoline Rodrigues Campos                                                                                                                                                                                                                                     |
| EPI_ISL_940626, EPI_ISL_940627                                                                                                                                                                                                                 | Hospital Central Sao Caetano do Sul                                                                  | Instituto Adolfo Lutz, Interdisciplinary Procedures Center,<br>Strategic Laboratory                              | Claudio Tavares Sacchi, Claudia Regina Gonçalves, Erica Valessa Ramos Gomes, Karoline Rodrigues Campos                                                                                                                                                                                                                                     |
| EPI_ISL_940630                                                                                                                                                                                                                                 | Hospital Geral de Sao Paulo                                                                          | Instituto Adolfo Lutz, Interdisciplinary Procedures Center,<br>Strategic Laboratory                              | Claudio Tavares Sacchi, Claudia Regina Gonçalves, Erica Valessa Ramos Gomes, Karoline Rodrigues Campos                                                                                                                                                                                                                                     |
| EPI_ISL_943045, EPI_ISL_943046                                                                                                                                                                                                                 | Dutch COVID-19 response team                                                                         | National Institute for Public Health and the Environment (RIVM)                                                  | Adam Meijer, Harry Vennema, Dirk Eggink, Jeroen Cremer, Sharon van den Brink, Bas van der Veer, AnneMarie van den Brandt, Florian Zwagemaker, Dennis Schmitz, Chantal Reusken, on behalf of the national COVID-19 response team                                                                                                            |
| EPI_ISL_943570                                                                                                                                                                                                                                 | Laboratorio de Referencia Nacional de Virus Respiratorio.<br>Instituto Nacional de Salud Perú        | Laboratorio de Referencia Nacional de Biotecnología y<br>Biología Molecular. Instituto Nacional de Salud Perú    | Carlos Padilla Rojas, Karolyn Vega Chozo, Luis Barcena, Priscila Lope Pari, Omar Caceres Rey, Marco Galarza Perez, Maribel Huaranga Nuñez, Johanna Balbuena Torrez, Henri Bailon Calderon, Nancy Rojas Serrano                                                                                                                             |
| EPI_ISL_943967, EPI_ISL_943968,<br>EPI_ISL_943969, EPI_ISL_943970,<br>EPI_ISL_943971                                                                                                                                                           | Hospital Geral de Sao Paulo                                                                          | Instituto Adolfo Lutz, Interdisciplinary Procedures Center,<br>Strategic Laboratory                              | Claudio Tavares Sacchi, Claudia Regina Gonçalves, Erica Valessa Ramos Gomes, Karoline Rodrigues Campos                                                                                                                                                                                                                                     |
| EPI_ISL_943987                                                                                                                                                                                                                                 | LACEN do Estado de Tocantins                                                                         | Instituto Adolfo Lutz, Interdisciplinary Procedures Center,<br>Strategic Laboratory                              | Claudio Tavares Sacchi, Claudia Regina Gonçalves, Erica Valessa Ramos Gomes, Karoline Rodrigues Campos                                                                                                                                                                                                                                     |
| EPI_ISL_943990                                                                                                                                                                                                                                 | LACEN do Estado de Goias                                                                             | Instituto Adolfo Lutz, Interdisciplinary Procedures Center,<br>Strategic Laboratory                              | Claudio Tavares Sacchi, Claudia Regina Gonçalves, Erica Valessa Ramos Gomes, Karoline Rodrigues Campos                                                                                                                                                                                                                                     |
| EPI_ISL_956287, EPI_ISL_956289,<br>EPI_ISL_956297                                                                                                                                                                                              | Instituto Nacional de Salud- Dirección de Redes de<br>Laboratorios de Salud Pública                  | Instituto Nacional de Salud- Dirección de Investigación en<br>Salud Pública                                      | Katherine Laiton-Donato, Diego A. Álvarez-Díaz, Carlos Franco-Muñoz, Mauricio Pacheco-Montealegre, Hector Alejandro Ruiz-Moreno, Maria T. Herrera-Sepúlveda, Diego Andrés Prada, Jhonnatan Reales-González, Sheryll Corchuelo, Julian Naizaque, Gerardo Santamaría, Magdalena Wiesner, Martha Lucia Ospina Martinez, Marcela Mercado-Reyes |
| EPI_ISL_981383, EPI_ISL_981385,<br>EPI_ISL_981387                                                                                                                                                                                              | IAL Regional de Bauru                                                                                | Instituto Adolfo Lutz, Interdisciplinary Procedures Center,<br>Strategic Laboratory                              | Claudio Tavares Sacchi, Claudia Regina Gonçalves, Erica Valessa Ramos Gomes, Karoline Rodrigues Campos                                                                                                                                                                                                                                     |
| EPI_ISL_981706, EPI_ISL_981707,<br>EPI_ISL_981708, EPI_ISL_981709,<br>EPI_ISL_981710, EPI_ISL_981711,<br>EPI_ISL_981712, EPI_ISL_981713,<br>EPI_ISL_981714                                                                                     | University Hospitals of Geneva, Laboratory of Virology                                               | HUG, Laboratory of Virology and the Health2030 Genome<br>Center                                                  | Samuel Cordey, Ana Rita Goncalves, Laurent Kaiser, Lorenzo Cerutti, Henri Pegeot, Melyssa Elies, Deborah Penet, Keith Harshman, Ioannis Xenarios, Emmanouil Dermitzakis                                                                                                                                                                    |
| EPI_ISL_983865, EPI_ISL_984619,<br>EPI_ISL_984620, EPI_ISL_984621                                                                                                                                                                              | Central Laboratory of Public Health of Rio Grande do Sul<br>(Lacen-RS)                               | State Center for Health Surveillance of the Health Department<br>of the State of Rio Grande do Sul (CEVS/SES-RS) | Aline Campos, Cynthia Molina, Lara Crescente, Leticia Garay, Ludmila Fiorenzano Baethgen, Richard Salvato, Tatiana Gregianini                                                                                                                                                                                                              |
| EPI_ISL_984622                                                                                                                                                                                                                                 | Department of Clinical Microbiology                                                                  | GIGA Medical Genomics                                                                                            | Keith Durkin, Maria Artesi, Sébastien Bontems, Raphaël Boreux, Bouchra Boujemla, Cécile Meex, Pierrette Melin, Marie-Pierre Hayette, Vincent Bours                                                                                                                                                                                         |
| EPI_ISL_985303, EPI_ISL_985304, EPI_ISL_985305, EPI_ISL_985306, EPI_ISL_985307, EPI_ISL_985308, EPI_ISL_985309, EPI_ISL_985310, EPI_ISL_985311, EPI_ISL_985312, EPI_ISL_985313, EPI_ISL_985314, EPI_ISL_985315, EPI_ISL_985316, EPI_ISL_985317 | see above                                                                                            | LACEN do Estado de Goias                                                                                         | Instituto Adolfo Lutz, Interdisciplinary Procedures Center,<br>Strategic Laboratory                                                                                                                                                                                                                                                        |
| EPI_ISL_985318, EPI_ISL_985319                                                                                                                                                                                                                 | LACEN de Santa Catarina                                                                              | Instituto Adolfo Lutz, Interdisciplinary Procedures Center,<br>Strategic Laboratory                              | Claudio Tavares Sacchi, Claudia Regina Gonçalves, Erica Valessa Ramos Gomes, Karoline Rodrigues Campos                                                                                                                                                                                                                                     |
| EPI_ISL_985404                                                                                                                                                                                                                                 | Hospital General Universitario Gregorio Marañón                                                      | Hospital General Universitario Gregorio Marañón                                                                  | Sergio Buenestado Serrano, Pedro Sola Campoy, Laura Pérez-Lago, Cristina Rodriguez-Grande, Pilar Catalán, Patricia Muñoz, Darío García de Viedma.                                                                                                                                                                                          |
